# Supplementary material for: How does Mo-dependent perchlorate reductase work in the decomposition of oxyanions?
Source: Royal Society of Chemistry journal article supplement (doi:10.1039/c9dt00863b), 2019-01-01
Supplement: c9dt00863b1.pdf [file c9dt00863b1.pdf]

**Electronic Supplementary Information to:**

**How does Mo-dependent perchlorate reductase work in the decomposition of oxyanions?**

Shuo-Qi Sun and Shi-Lu Chen\*

*Key Laboratory of Cluster Science of Ministry of Education, School of Chemistry and Chemical Engineering, Beijing Institute of Technology, Beijing 100081, China*

*E-mail: shlchen@bit.edu.cn*

**Contents:**

1. Supplementary figures and scheme.
2. Cartesian coordinates of optimized structures

## 1. Supplementary figures and scheme

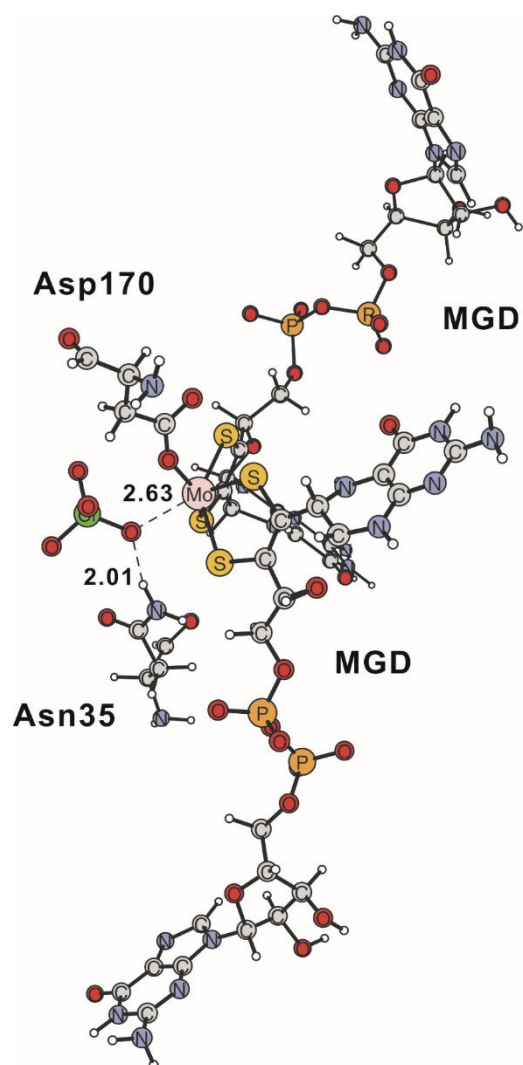

**Fig. S1** The binding of perchlorate in the PcrAB active site predicted by the docking simulation. Some important distances are tagged in angstrom (Å).

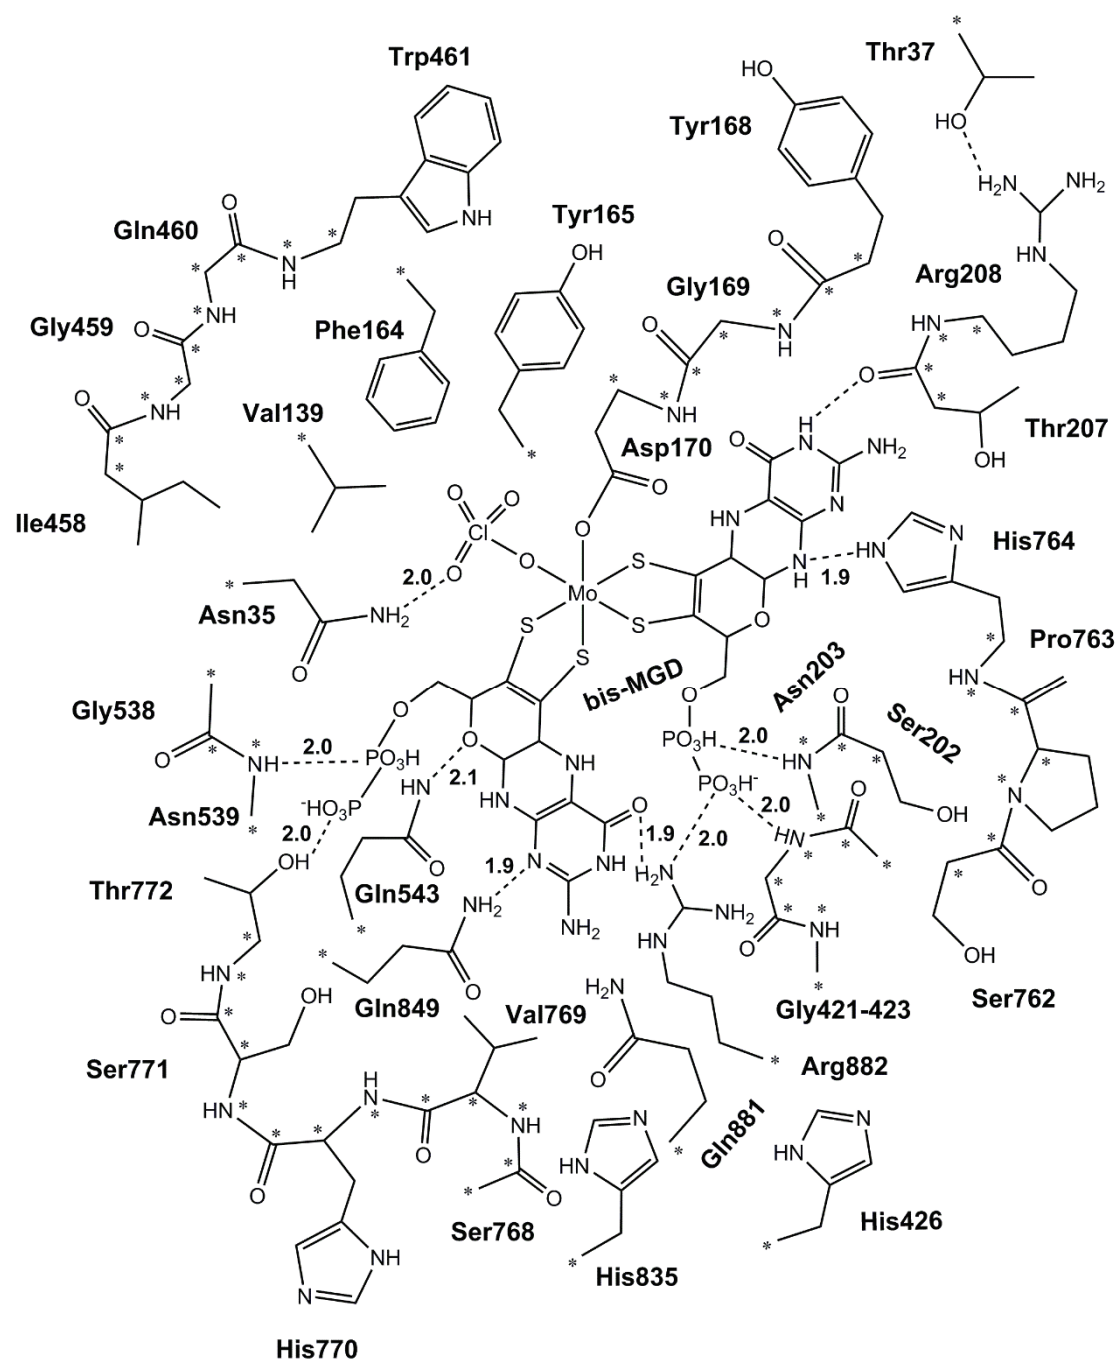

**Fig. S2** A bigger model (537 atoms) of the PcrAB active site used in this work. For clarity, 2-D schematic structure is shown. Asterisks indicate the atoms which are fixed to their X-ray positions. The distances optimized are in angstroms (Å).

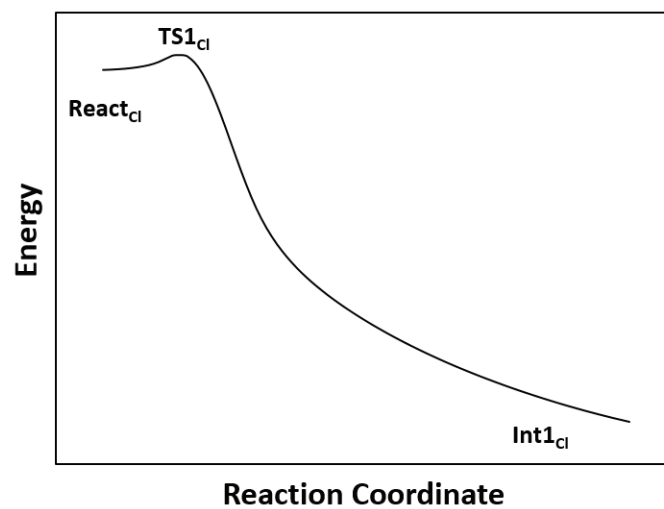

**Fig. S3** Schematic potential energy surface obtained by the IRC (intrinsic reaction coordinate) calculations with the **TS1<sub>cl</sub>** structure as the starting point.

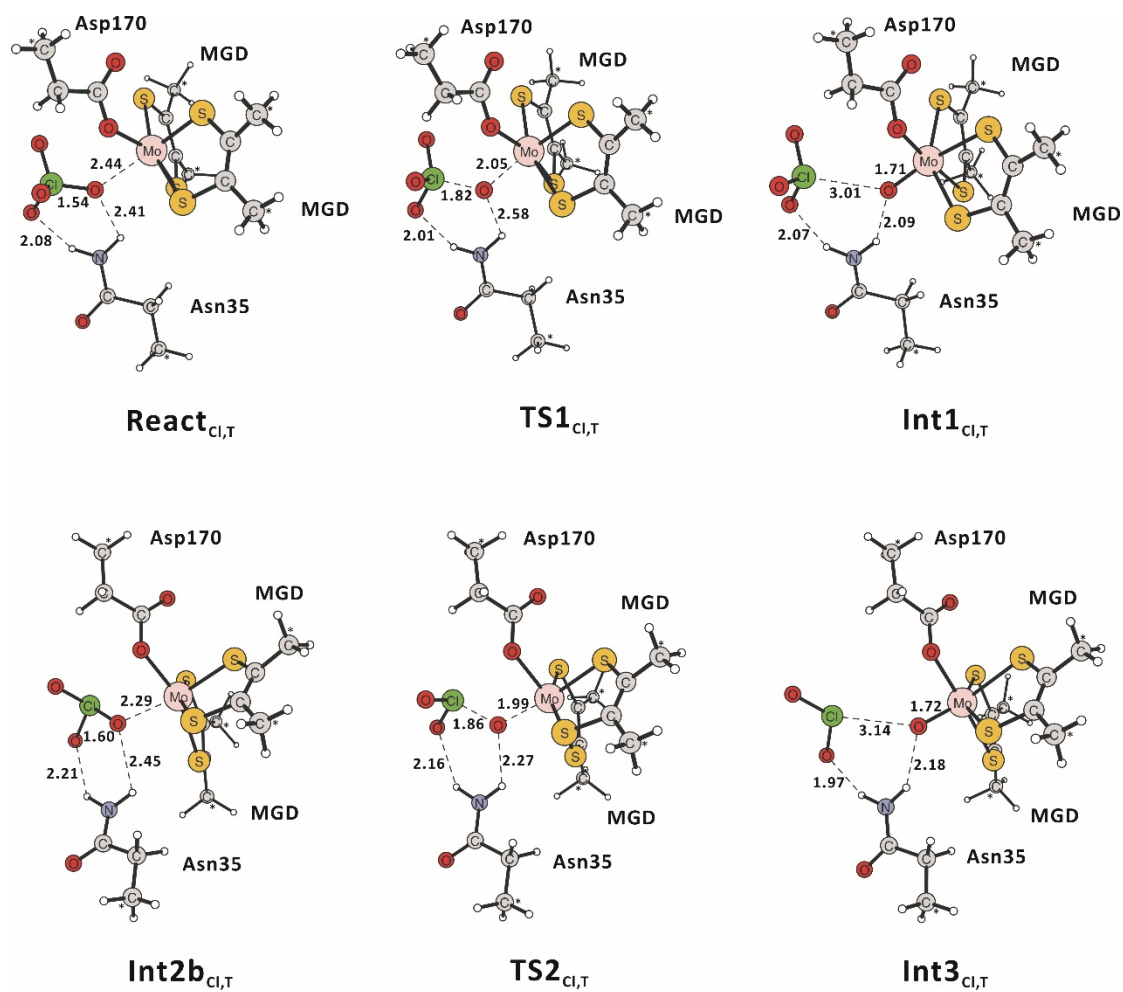

**Fig. S4** Optimized structures of stationary points for the PcrAB-catalyzed decomposition of perchlorate in the triplet state. Some important distances are tagged in angstrom (Å). Asterisks indicate the atoms that are fixed at their crystal positions.

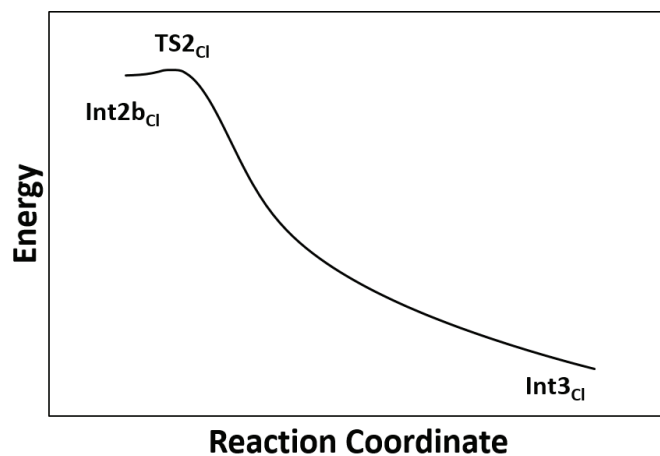

**Fig. S5** Schematic potential energy surface obtained by the IRC (intrinsic reaction coordinate) calculations with the **TS2<sub>Cl</sub>** structure as the starting point.

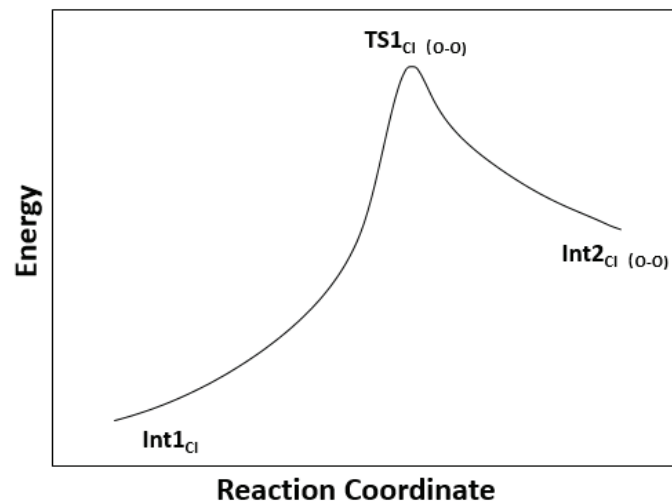

**Fig. S6** Schematic potential energy surface obtained by the IRC (intrinsic reaction coordinate) calculations with the **TS1<sub>Cl(0-0)</sub>** structure as the starting point.

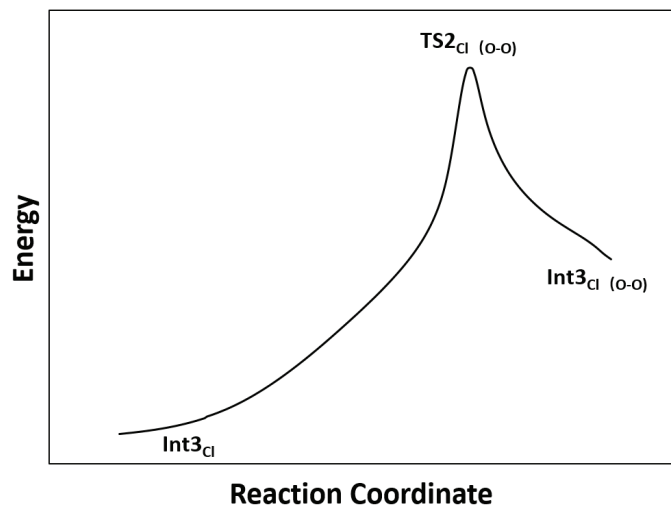

**Fig. S7** Schematic potential energy surface obtained by the IRC (intrinsic reaction coordinate) calculations with the **TS2<sub>Cl(0-0)</sub>** structure as the starting point.



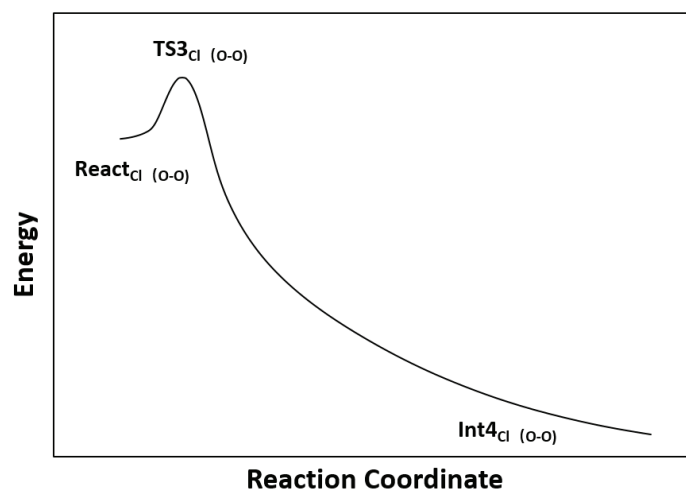

**Fig. S8** Schematic potential energy surface obtained by the IRC (intrinsic reaction coordinate) calculations with the **TS3<sub>Cl(0-0)</sub>** structure as the starting point.

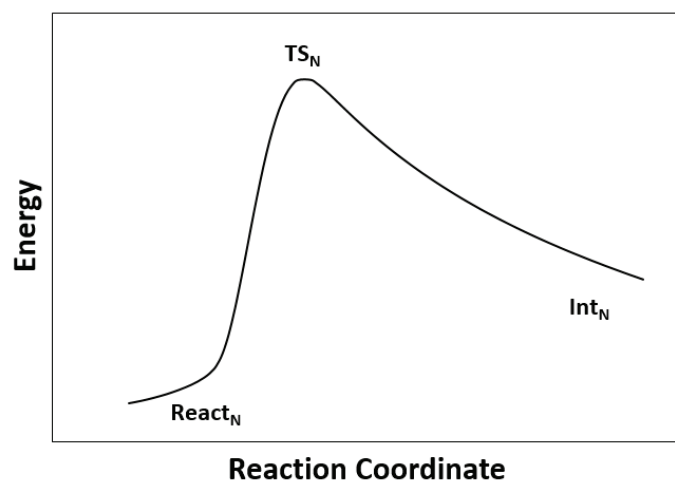

**Fig. S9** Schematic potential energy surface obtained by the IRC (intrinsic reaction coordinate) calculations with the **TS<sub>N</sub>** structure as the starting point.

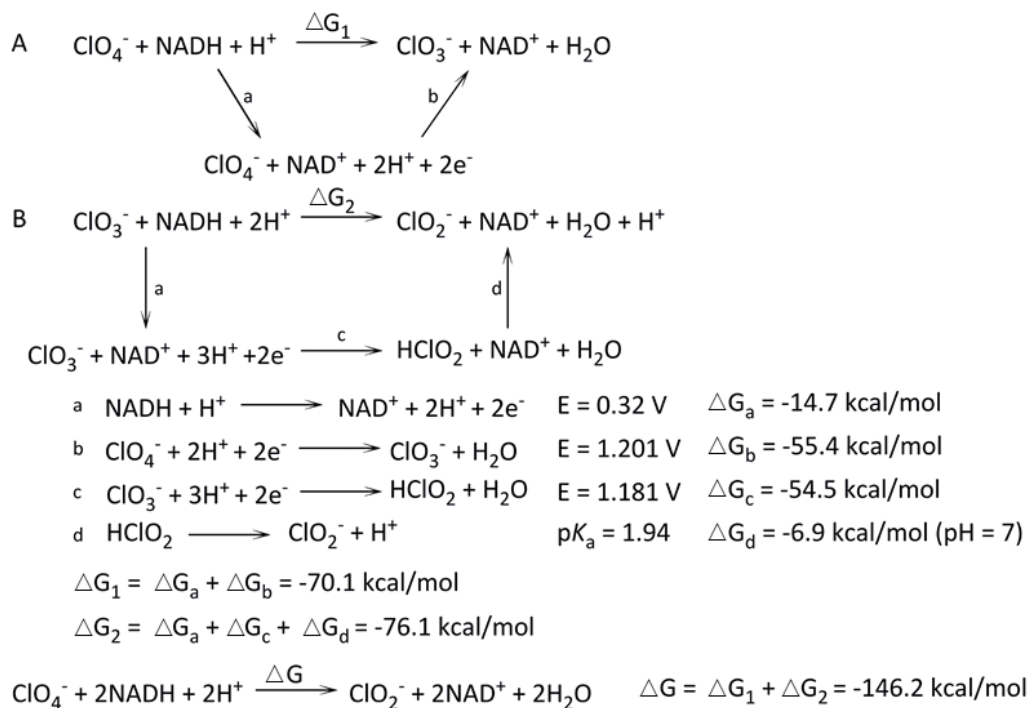

**Scheme S1** The thermochemical cycle for the uncatalyzed reduction of  $\text{ClO}_4^-$  to  $\text{ClO}_2^-$  via  $\text{ClO}_3^-$  by NADH. The reduction potentials for the reactions of a, b, and c are obtained from Refs. 72, 73, and 74 (given in the text), respectively. The  $\text{p}K_a$  of reaction d is taken from Refs. 75 and 76.

## 2. Cartesian coordinates of optimized structures

The abbreviations used here are consistent with those in the text.

### React1

|    |                |                |                |
|----|----------------|----------------|----------------|
| C  | 257.8290000000 | 191.8650000000 | 391.3050000000 |
| C  | 258.0021737897 | 190.7011002278 | 392.2837700954 |
| C  | 257.3431771609 | 189.4362235749 | 391.7178649005 |
| O  | 257.4402230429 | 189.1612146440 | 390.5163086866 |
| N  | 256.6845763816 | 188.6815486942 | 392.6122901510 |
| C  | 251.9230000000 | 184.0210000000 | 398.3810000000 |
| C  | 252.6231875939 | 184.8670207252 | 397.3250814532 |
| C  | 253.4465894810 | 186.0013227554 | 397.9394804719 |
| O  | 253.4433560237 | 186.2290336052 | 399.1448530840 |
| O  | 254.1061739460 | 186.6463863492 | 397.0143959225 |
| Mo | 255.5042595714 | 188.1382225588 | 397.0608762780 |
| C  | 253.4590000000 | 191.9940000000 | 399.2530000000 |
| C  | 254.1526237920 | 191.0325439174 | 398.3000855722 |
| S  | 254.1258631582 | 189.3119883251 | 398.6621391622 |
| C  | 254.8566251975 | 191.4753695164 | 397.2297247584 |
| S  | 255.6831635179 | 190.3523281362 | 396.1611746652 |
| C  | 255.0790000000 | 192.9360000000 | 396.9760000000 |
| C  | 260.3070000000 | 187.3170000000 | 397.1300000000 |
| C  | 258.8366646394 | 187.3641910715 | 397.5552448156 |
| S  | 257.7673640234 | 187.9242253805 | 396.2532621969 |
| C  | 258.2733785254 | 187.0851260130 | 398.7635744637 |
| S  | 256.5209718051 | 187.2684494790 | 398.9935083598 |
| C  | 258.9150000000 | 186.6290000000 | 400.0610000000 |
| O  | 254.5790542204 | 186.6229373865 | 392.6101528668 |
| O  | 255.1054947163 | 187.5993403174 | 394.7777986846 |
| O  | 254.7044059805 | 185.1369721831 | 394.5525632645 |
| H  | 257.6024064416 | 190.9454696828 | 393.2740381867 |
| H  | 259.0699545026 | 190.4805290538 | 392.4158805877 |
| H  | 256.5679551383 | 188.9416909348 | 393.5814244139 |
| H  | 256.1541358848 | 187.8674308124 | 392.3213621372 |
| H  | 258.1523728221 | 191.5527189802 | 390.3081295280 |
| H  | 251.2758048783 | 184.6431540739 | 399.0070569102 |
| H  | 251.9125249541 | 185.3246322216 | 396.6265416021 |
| H  | 253.2958519899 | 184.2755137702 | 396.6947188951 |
| H  | 254.1736116018 | 192.6838034015 | 399.7252862077 |
| H  | 260.4322957533 | 186.6606352607 | 396.2611866521 |
| H  | 258.4836970611 | 185.6771476618 | 400.3937095523 |
| H  | 258.7382837531 | 187.3602168902 | 400.8593673932 |

|    |                |                |                |
|----|----------------|----------------|----------------|
| H  | 260.0004073642 | 186.4895406002 | 399.9628781045 |
| H  | 255.8200591885 | 193.3554733037 | 397.6743070485 |
| H  | 254.1598952288 | 193.5259110984 | 397.0993017379 |
| H  | 252.9453597256 | 191.4492584965 | 400.0507539674 |
| H  | 256.7755442390 | 192.1598635307 | 391.2356907593 |
| H  | 258.4064183498 | 192.7441249630 | 391.6158377457 |
| H  | 260.6539415296 | 188.3152920237 | 396.8382511713 |
| H  | 260.9544381938 | 186.9484863017 | 397.9357211106 |
| H  | 251.3147361381 | 183.2286849047 | 397.9245763109 |
| H  | 252.6527155820 | 183.5541357883 | 399.0507705638 |
| Cl | 254.2767728401 | 186.4867926648 | 394.0852779775 |
| O  | 252.8180852469 | 186.7028002184 | 394.3115035156 |
| H  | 252.7133321642 | 192.6110524059 | 398.7320286770 |
| H  | 255.4532887563 | 193.1151134139 | 395.9629850870 |

## TS1Cl

|    |                |                |                |
|----|----------------|----------------|----------------|
| C  | 257.8290000000 | 191.8650000000 | 391.3050000000 |
| C  | 257.8831640000 | 190.7577700000 | 392.3591800000 |
| C  | 257.3604780000 | 189.4384910000 | 391.7764070000 |
| O  | 257.5854380000 | 189.1345050000 | 390.5987670000 |
| N  | 256.6740790000 | 188.6667280000 | 392.6340060000 |
| C  | 251.9230000000 | 184.0210000000 | 398.3810000000 |
| C  | 252.6765490000 | 184.8319310000 | 397.3427290000 |
| C  | 253.4486130000 | 185.9941980000 | 397.9666580000 |
| O  | 253.4249160000 | 186.2263430000 | 399.1706420000 |
| O  | 254.0927420000 | 186.6503100000 | 397.0426650000 |
| Mo | 255.4965650000 | 188.1403620000 | 397.0063570000 |
| C  | 253.4590000000 | 191.9940000000 | 399.2530000000 |
| C  | 254.1345830000 | 191.0324360000 | 398.2831160000 |
| S  | 254.0681850000 | 189.3066100000 | 398.6129410000 |
| C  | 254.8433180000 | 191.4801660000 | 397.2197920000 |
| S  | 255.6529810000 | 190.3754040000 | 396.1232830000 |
| C  | 255.0790000000 | 192.9360000000 | 396.9760000000 |
| C  | 260.3070000000 | 187.3170000000 | 397.1300000000 |
| C  | 258.8408200000 | 187.3789580000 | 397.5566190000 |
| S  | 257.7907970000 | 187.9288930000 | 396.2427380000 |
| C  | 258.2725760000 | 187.0951820000 | 398.7627930000 |
| S  | 256.5232770000 | 187.2843940000 | 398.9737120000 |
| C  | 258.9150000000 | 186.6290000000 | 400.0610000000 |
| O  | 254.6710710000 | 186.5573610000 | 392.7829930000 |
| O  | 255.2227160000 | 187.6769190000 | 394.9608860000 |
| O  | 254.7780550000 | 185.0728310000 | 394.7276320000 |
| H  | 257.3304740000 | 191.0318000000 | 393.2645410000 |

|    |                |                |                |
|----|----------------|----------------|----------------|
| H  | 258.9228410000 | 190.5852770000 | 392.6681510000 |
| H  | 256.4619090000 | 188.9272910000 | 393.5876040000 |
| H  | 256.2511730000 | 187.7966790000 | 392.3355900000 |
| H  | 258.3107270000 | 191.5182440000 | 390.3869030000 |
| H  | 251.2153370000 | 184.6524320000 | 398.9280110000 |
| H  | 252.0121050000 | 185.2537120000 | 396.5802680000 |
| H  | 253.3967490000 | 184.2251090000 | 396.7832570000 |
| H  | 254.1919020000 | 192.6220760000 | 399.7790380000 |
| H  | 260.4285870000 | 186.6441580000 | 396.2731710000 |
| H  | 258.4815060000 | 185.6762870000 | 400.3875710000 |
| H  | 258.7403980000 | 187.3561200000 | 400.8631620000 |
| H  | 259.9994260000 | 186.4888170000 | 399.9591330000 |
| H  | 255.9641140000 | 193.2969340000 | 397.5231100000 |
| H  | 254.2321560000 | 193.5580840000 | 397.2920020000 |
| H  | 252.8923490000 | 191.4433590000 | 400.0097370000 |
| H  | 256.7912040000 | 192.1163180000 | 391.0583300000 |
| H  | 258.3244880000 | 192.7788540000 | 391.6537770000 |
| H  | 260.6594030000 | 188.3074280000 | 396.8192740000 |
| H  | 260.9561610000 | 186.9600360000 | 397.9398410000 |
| H  | 251.3677300000 | 183.1914510000 | 397.9228990000 |
| H  | 252.6113620000 | 183.6073920000 | 399.1252920000 |
| Cl | 254.3222020000 | 186.4119650000 | 394.2440280000 |
| O  | 252.8474170000 | 186.6015890000 | 394.4148940000 |
| H  | 252.7622660000 | 192.6689680000 | 398.7374740000 |
| H  | 255.2604810000 | 193.1414910000 | 395.9150190000 |

## Int1Cl

|    |                |                |                |
|----|----------------|----------------|----------------|
| C  | 257.8290000000 | 191.8650000000 | 391.3050000000 |
| C  | 257.3803895090 | 190.7835872479 | 392.2986331714 |
| C  | 256.6885792045 | 189.5940583140 | 391.6017062707 |
| O  | 256.7953096399 | 189.4319030459 | 390.3822649273 |
| N  | 256.0036787254 | 188.7703009134 | 392.4211206340 |
| C  | 251.9230000000 | 184.0210000000 | 398.3810000000 |
| C  | 252.7375498919 | 184.8627274890 | 397.3957796084 |
| C  | 253.5418454177 | 185.9643892532 | 398.0775936461 |
| O  | 253.6112949242 | 186.1131140472 | 399.2877300488 |
| O  | 254.1498298902 | 186.7261673953 | 397.1803165978 |
| Mo | 255.4902342329 | 188.1884251377 | 396.8946003075 |
| C  | 253.4590000000 | 191.9940000000 | 399.2530000000 |
| C  | 254.2329768059 | 191.0620409322 | 398.3532492972 |
| S  | 253.8879247650 | 189.3333420112 | 398.4360303833 |
| C  | 255.1468928158 | 191.5345606597 | 397.4858151574 |
| S  | 256.3783915455 | 190.5056291839 | 396.7675390910 |

|    |                |                |                |
|----|----------------|----------------|----------------|
| C  | 255.0790000000 | 192.9360000000 | 396.9760000000 |
| C  | 260.3070000000 | 187.3170000000 | 397.1300000000 |
| C  | 258.8224464465 | 187.3244318932 | 397.5309854490 |
| S  | 257.7594264155 | 187.6372510101 | 396.1757097671 |
| C  | 258.2551871315 | 187.1066850331 | 398.7732109669 |
| S  | 256.5610359635 | 187.3603812909 | 399.0356232025 |
| C  | 258.9150000000 | 186.6290000000 | 400.0610000000 |
| O  | 254.5166947050 | 186.0332810538 | 392.6008446578 |
| O  | 255.1949258415 | 188.2013533765 | 395.1957145456 |
| O  | 254.5148929381 | 184.3375464474 | 394.4527167693 |
| H  | 256.7209877264 | 191.1975358474 | 393.0710653254 |
| H  | 258.2480482620 | 190.3846857385 | 392.8410824684 |
| H  | 255.9429056561 | 188.8999885087 | 393.4243009827 |
| H  | 255.5716011056 | 187.9105477489 | 392.0891046709 |
| H  | 258.4302710425 | 191.4143372907 | 390.5113415780 |
| H  | 251.1988242400 | 184.6398696087 | 398.9218891771 |
| H  | 252.1080414453 | 185.3298028897 | 396.6299395486 |
| H  | 253.4412549266 | 184.2560417518 | 396.8120544159 |
| H  | 253.9901550358 | 192.9349102617 | 399.4160101825 |
| H  | 260.4882028398 | 186.6217923018 | 396.3032796827 |
| H  | 258.4434129836 | 185.6970400020 | 400.3887510798 |
| H  | 258.7859920011 | 187.3645564848 | 400.8615609643 |
| H  | 259.9901910986 | 186.4426469279 | 399.9397843046 |
| H  | 256.0492068276 | 193.4555940163 | 396.9954352227 |
| H  | 254.3580861399 | 193.5530547207 | 397.5175212752 |
| H  | 253.3201455837 | 191.5230808944 | 400.2337199433 |
| H  | 256.9648601185 | 192.3356882283 | 390.8247871421 |
| H  | 258.4132096950 | 192.6440680684 | 391.8082413971 |
| H  | 260.6105811257 | 188.3162603969 | 396.7992208285 |
| H  | 260.9468467747 | 187.0247081874 | 397.9705746455 |
| H  | 251.3791836245 | 183.2297797083 | 397.8522973002 |
| H  | 252.5732379535 | 183.5589713067 | 399.1310473374 |
| Cl | 253.9808016389 | 185.7267776082 | 394.0283104991 |
| O  | 252.4371934251 | 185.6364934763 | 393.9556229814 |
| H  | 252.4509468395 | 192.2279740765 | 398.8772250361 |
| H  | 254.7647170721 | 192.9162817066 | 395.9233431923 |

## Int1bc1

|   |                |                |                |
|---|----------------|----------------|----------------|
| C | 257.8290000000 | 191.8650000000 | 391.3050000000 |
| C | 257.6573505351 | 190.8590354752 | 392.4472235415 |
| C | 257.3248935363 | 189.4615750869 | 391.9154342596 |
| O | 257.7271226373 | 189.0733408723 | 390.8181653611 |
| N | 256.5758080676 | 188.6905812398 | 392.7389479046 |

|    |                |                |                |
|----|----------------|----------------|----------------|
| C  | 251.9230000000 | 184.0210000000 | 398.3810000000 |
| C  | 252.8233820465 | 184.7890169296 | 397.4262697280 |
| C  | 253.5862666888 | 185.9240829145 | 398.1146423985 |
| O  | 253.6263294047 | 186.0714362632 | 399.3236181364 |
| O  | 254.1748238001 | 186.6738972687 | 397.2090821226 |
| Mo | 255.4867280935 | 188.1689160461 | 396.8679567311 |
| C  | 253.4590000000 | 191.9940000000 | 399.2530000000 |
| C  | 254.2016512467 | 191.0498930606 | 398.3235443441 |
| S  | 253.8617645436 | 189.3156980294 | 398.3799334466 |
| C  | 255.0958178064 | 191.5173094193 | 397.4323130541 |
| S  | 256.2916264017 | 190.4821485312 | 396.6635214848 |
| C  | 255.0790000000 | 192.9360000000 | 396.9760000000 |
| C  | 260.3070000000 | 187.3170000000 | 397.1300000000 |
| C  | 258.8239832742 | 187.3195540329 | 397.5277372072 |
| S  | 257.7587961703 | 187.6014737758 | 396.1680068622 |
| C  | 258.2561097233 | 187.1198388689 | 398.7739799213 |
| S  | 256.5681962058 | 187.4214747962 | 399.0316979656 |
| C  | 258.9150000000 | 186.6290000000 | 400.0610000000 |
| O  | 255.1583971498 | 188.0407086744 | 395.1672376012 |
| H  | 256.9008687041 | 191.1868626406 | 393.1696249623 |
| H  | 258.5943349940 | 190.7675335362 | 393.0134447521 |
| H  | 256.2643928317 | 188.9560311177 | 393.6650480805 |
| H  | 256.4059031991 | 187.7330861140 | 392.4709434763 |
| H  | 258.5348179361 | 191.4710160818 | 390.5693595066 |
| H  | 251.1574784210 | 184.6773865749 | 398.8057925209 |
| H  | 252.2593422695 | 185.2246092506 | 396.5946052011 |
| H  | 253.5723849744 | 184.1315721495 | 396.9662393741 |
| H  | 254.0644892843 | 192.8712588967 | 399.4917023724 |
| H  | 260.4971447686 | 186.6200188497 | 396.3070734173 |
| H  | 258.4274166204 | 185.7054858694 | 400.3884144594 |
| H  | 258.8026934607 | 187.3659333274 | 400.8620009525 |
| H  | 259.9843335299 | 186.4247558520 | 399.9305211067 |
| H  | 256.0497120598 | 193.4414329859 | 397.0871637316 |
| H  | 254.3285413847 | 193.5353593354 | 397.4954104007 |
| H  | 253.2321522987 | 191.4827242514 | 400.1946284599 |
| H  | 256.8780866914 | 192.0370947956 | 390.7886430750 |
| H  | 258.1943358146 | 192.8278890949 | 391.6777374655 |
| H  | 260.6040416009 | 188.3170512990 | 396.7969580575 |
| H  | 260.9453175574 | 187.0340143244 | 397.9737658656 |
| H  | 251.4214583899 | 183.1890408097 | 397.8732962180 |
| H  | 252.5021379055 | 183.6230224565 | 399.2187137423 |
| H  | 252.4992922373 | 192.3364940820 | 398.8402292853 |
| H  | 254.8376948131 | 192.9692044518 | 395.9050369594 |

**Int2Cl**



|    |                |                |                |
|----|----------------|----------------|----------------|
| C  | 257.8290000000 | 191.8650000000 | 391.3050000000 |
| C  | 257.6818675337 | 191.0859686863 | 392.6150841305 |
| C  | 256.7746564875 | 189.8629494585 | 392.4549994947 |
| O  | 255.7984072584 | 189.8745743041 | 391.7069387435 |
| N  | 257.1373971624 | 188.7749503854 | 393.1872624072 |
| C  | 251.9230000000 | 184.0210000000 | 398.3810000000 |
| C  | 252.6188209834 | 184.8147573803 | 397.2775564822 |
| C  | 253.4429417837 | 185.9789675404 | 397.8350089300 |
| O  | 253.4605328588 | 186.2359666811 | 399.0271468637 |
| O  | 254.0987215539 | 186.6307216494 | 396.8930198755 |
| Mo | 255.5366193719 | 188.1743160144 | 397.0714186660 |
| C  | 253.4590000000 | 191.9940000000 | 399.2530000000 |
| C  | 254.1589245821 | 191.0334737289 | 398.3057780493 |
| S  | 254.1514178681 | 189.3115223700 | 398.6586623000 |
| C  | 254.8620612240 | 191.4813582706 | 397.2373535729 |
| S  | 255.7084276916 | 190.3706369282 | 396.1797128220 |
| C  | 255.0790000000 | 192.9360000000 | 396.9760000000 |
| C  | 260.3070000000 | 187.3170000000 | 397.1300000000 |
| C  | 258.8420189877 | 187.3497769914 | 397.5604544534 |
| S  | 257.7689116745 | 187.9369549058 | 396.2791661302 |
| C  | 258.2691525986 | 187.0627489651 | 398.7615249397 |
| S  | 256.5133948327 | 187.2231454974 | 398.9805854813 |
| C  | 258.9150000000 | 186.6290000000 | 400.0610000000 |
| O  | 254.8672079058 | 187.6548716480 | 394.7950890678 |
| H  | 257.2121559380 | 191.7112606249 | 393.3860775171 |
| H  | 258.6596435744 | 190.7895473848 | 393.0122750692 |
| H  | 257.7674770764 | 188.8732965630 | 393.9752926913 |
| H  | 256.4405700486 | 188.0509509677 | 393.3152057842 |
| H  | 258.3824711829 | 191.2813814874 | 390.5607170137 |
| H  | 251.2664173465 | 184.6720528201 | 398.9645132848 |
| H  | 251.8936039310 | 185.2279302418 | 396.5637078250 |
| H  | 253.2911693851 | 184.1798481594 | 396.6869115477 |
| H  | 254.1734464307 | 192.6848134249 | 399.7205394952 |
| H  | 260.4359725716 | 186.6670299701 | 396.2569264117 |
| H  | 258.4815842990 | 185.6871330060 | 400.4158672466 |
| H  | 258.7462705946 | 187.3789460379 | 400.8422875538 |
| H  | 259.9976447064 | 186.4837603249 | 399.9577509282 |
| H  | 255.8248659643 | 193.3549935297 | 397.6675842282 |
| H  | 254.1607740071 | 193.5233248775 | 397.1064089431 |
| H  | 252.9451499157 | 191.4527874717 | 400.0524106152 |
| H  | 256.8393682074 | 192.0743028329 | 390.8905267442 |
| H  | 258.3598816610 | 192.8100175889 | 391.4620592856 |
| H  | 260.6474474791 | 188.3197838017 | 396.8481440219 |

|   |                |                |                |
|---|----------------|----------------|----------------|
| H | 260.9578474039 | 186.9461994241 | 397.9302435678 |
| H | 251.3279564279 | 183.1987835614 | 397.9658141536 |
| H | 252.6584454990 | 183.6054842223 | 399.0755655418 |
| H | 252.7144759381 | 192.6043745536 | 398.7250450092 |
| H | 255.4446471485 | 193.1150057032 | 395.9601817887 |
| H | 254.2300239878 | 187.0210307058 | 395.1992064335 |
| H | 254.3837801215 | 188.4538516329 | 394.5382019025 |

## Int2bCl

|    |                |                |                |
|----|----------------|----------------|----------------|
| C  | 257.8290000000 | 191.8650000000 | 391.3050000000 |
| C  | 257.5184926313 | 190.6714357155 | 392.2110648773 |
| C  | 256.4629990906 | 189.7556170378 | 391.5737893819 |
| O  | 256.3073896077 | 189.7217776001 | 390.3466084340 |
| N  | 255.7628812838 | 189.0045397686 | 392.4398203745 |
| C  | 251.9230000000 | 184.0210000000 | 398.3810000000 |
| C  | 252.4218789234 | 185.0335802207 | 397.3651357534 |
| C  | 253.3829826903 | 186.0499656590 | 397.9933155646 |
| O  | 253.4587904366 | 186.2055417693 | 399.2072329917 |
| O  | 254.0432399821 | 186.6827624460 | 397.0661057627 |
| Mo | 255.5163314696 | 188.1503228862 | 397.0489961659 |
| C  | 253.4590000000 | 191.9940000000 | 399.2530000000 |
| C  | 254.1704007048 | 191.0374053008 | 398.3114510056 |
| S  | 254.1456430039 | 189.3175720261 | 398.6672519975 |
| C  | 254.8887441606 | 191.4811411877 | 397.2528277557 |
| S  | 255.7563680953 | 190.3778406236 | 396.2044858801 |
| C  | 255.0790000000 | 192.9360000000 | 396.9760000000 |
| C  | 260.3070000000 | 187.3170000000 | 397.1300000000 |
| C  | 258.8355876815 | 187.3485539641 | 397.5486024926 |
| S  | 257.7715429965 | 187.8971124563 | 396.2365028806 |
| C  | 258.2695790100 | 187.0551323620 | 398.7532949385 |
| S  | 256.5143286323 | 187.1930153933 | 398.9722177262 |
| C  | 258.9150000000 | 186.6290000000 | 400.0610000000 |
| O  | 253.3076292824 | 187.5896731726 | 393.1564714927 |
| O  | 255.0497735383 | 187.6981523425 | 394.9437040856 |
| O  | 253.9674734108 | 185.4605356695 | 394.2825231023 |
| H  | 257.1900704919 | 190.9916059033 | 393.2066474842 |
| H  | 258.4242176055 | 190.0704242912 | 392.3701981074 |
| H  | 255.8612779950 | 189.0375153418 | 393.4481110879 |
| H  | 255.0205486010 | 188.3909610799 | 392.1254734301 |
| H  | 258.0770631375 | 191.5127271160 | 390.3002168062 |
| H  | 251.4709351444 | 184.5305293613 | 399.2371429092 |
| H  | 251.5852036463 | 185.6029607886 | 396.9356043318 |
| H  | 252.9289103490 | 184.5643624253 | 396.5162382615 |

|    |                |                |                |
|----|----------------|----------------|----------------|
| H  | 254.1635507803 | 192.6788246237 | 399.7476012886 |
| H  | 260.4465740386 | 186.6520644948 | 396.2691182855 |
| H  | 258.4930061493 | 185.6791277620 | 400.4107912295 |
| H  | 258.7272300495 | 187.3736650751 | 400.8441506121 |
| H  | 260.0026482453 | 186.5007784718 | 399.9688614769 |
| H  | 255.8512149841 | 193.3750721673 | 397.6280529957 |
| H  | 254.1609305718 | 193.5170811119 | 397.1404264359 |
| H  | 252.9255634546 | 191.4453845367 | 400.0352959832 |
| H  | 256.9555892032 | 192.5201684351 | 391.2118764421 |
| H  | 258.6613122898 | 192.4600650645 | 391.6991251106 |
| H  | 260.6431435418 | 188.3160762889 | 396.8280247360 |
| H  | 260.9577628604 | 186.9658503408 | 397.9415080111 |
| H  | 251.1853027407 | 183.3344604464 | 397.9444688243 |
| H  | 252.7539421914 | 183.4238478460 | 398.7723240134 |
| Cl | 253.6603532563 | 186.9362329817 | 394.5048332648 |
| H  | 252.7256987414 | 192.6173705698 | 398.7213796320 |
| H  | 255.3974166465 | 193.1102375811 | 395.9428832086 |

## TS<sub>2Cl</sub>

|    |                |                |                |
|----|----------------|----------------|----------------|
| C  | 257.8281960000 | 191.8641050000 | 391.3057130000 |
| C  | 257.3880820000 | 190.7625400000 | 392.2692790000 |
| C  | 256.4351920000 | 189.7679330000 | 391.5921360000 |
| O  | 256.2157080000 | 189.8171040000 | 390.3753270000 |
| N  | 255.8980230000 | 188.8524460000 | 392.4167460000 |
| C  | 251.9235630000 | 184.0217280000 | 398.3807150000 |
| C  | 252.5088160000 | 184.9468930000 | 397.3300940000 |
| C  | 253.4019220000 | 186.0244810000 | 397.9541290000 |
| O  | 253.4386950000 | 186.2103910000 | 399.1647720000 |
| O  | 254.0529770000 | 186.6631080000 | 397.0255020000 |
| Mo | 255.5092740000 | 188.1501720000 | 396.9881910000 |
| C  | 253.4589030000 | 191.9933110000 | 399.2523550000 |
| C  | 254.1397680000 | 191.0343980000 | 398.2838110000 |
| S  | 254.0746230000 | 189.3062580000 | 398.6048750000 |
| C  | 254.8588470000 | 191.4834840000 | 397.2293580000 |
| S  | 255.6959680000 | 190.3923340000 | 396.1416710000 |
| C  | 255.0794330000 | 192.9368540000 | 396.9763790000 |
| C  | 260.3074000000 | 187.3173200000 | 397.1302730000 |
| C  | 258.8412010000 | 187.3746060000 | 397.5533450000 |
| S  | 257.7978560000 | 187.9316430000 | 396.2356520000 |
| C  | 258.2692590000 | 187.0757140000 | 398.7547250000 |
| S  | 256.5146230000 | 187.2293530000 | 398.9514100000 |
| C  | 258.9145050000 | 186.6286820000 | 400.0605640000 |
| O  | 253.7446400000 | 187.0012510000 | 392.9924320000 |

|    |                |                |                |
|----|----------------|----------------|----------------|
| O  | 255.1906850000 | 187.7020780000 | 394.9851400000 |
| O  | 254.6620490000 | 185.1568430000 | 394.4300710000 |
| H  | 256.9016040000 | 191.1742930000 | 393.1623570000 |
| H  | 258.2546960000 | 190.2025910000 | 392.6446060000 |
| H  | 256.0015280000 | 188.8501230000 | 393.4266830000 |
| H  | 255.2013370000 | 188.1945340000 | 392.0879950000 |
| H  | 258.2789600000 | 191.4292880000 | 390.4093370000 |
| H  | 251.3813120000 | 184.5968710000 | 399.1368310000 |
| H  | 251.7159720000 | 185.4628520000 | 396.7711030000 |
| H  | 253.1023050000 | 184.4082620000 | 396.5834850000 |
| H  | 254.1888760000 | 192.6175520000 | 399.7868340000 |
| H  | 260.4323420000 | 186.6468430000 | 396.2717890000 |
| H  | 258.4880080000 | 185.6765030000 | 400.3979000000 |
| H  | 258.7306880000 | 187.3645040000 | 400.8526310000 |
| H  | 260.0006370000 | 186.4975330000 | 399.9633340000 |
| H  | 255.9814810000 | 193.3043460000 | 397.4911980000 |
| H  | 254.2416730000 | 193.5571320000 | 397.3185480000 |
| H  | 252.8861140000 | 191.4402050000 | 400.0028490000 |
| H  | 256.9684000000 | 192.4540880000 | 390.9725240000 |
| H  | 258.5503360000 | 192.5390920000 | 391.7801940000 |
| H  | 260.6608830000 | 188.3087200000 | 396.8232250000 |
| H  | 260.9559850000 | 186.9579560000 | 397.9399270000 |
| H  | 251.2420070000 | 183.2819810000 | 397.9399620000 |
| H  | 252.7190930000 | 183.4836640000 | 398.9067200000 |
| Cl | 253.9981610000 | 186.5278740000 | 394.4342060000 |
| H  | 252.7660560000 | 192.6724000000 | 398.7366090000 |
| H  | 255.2248040000 | 193.1415540000 | 395.9093410000 |

### **Int3Cl**

|    |                |                |                |
|----|----------------|----------------|----------------|
| C  | 257.8281960000 | 191.8641050000 | 391.3057130000 |
| C  | 257.0916077694 | 191.1217958862 | 392.4293925195 |
| C  | 255.5900395726 | 190.9275973861 | 392.1230219546 |
| O  | 255.0772096861 | 191.4755215112 | 391.1408526502 |
| N  | 254.9295802011 | 190.1439680593 | 392.9962209536 |
| C  | 251.9235630000 | 184.0217280000 | 398.3807150000 |
| C  | 252.5934278979 | 184.9619178892 | 397.3800659374 |
| C  | 253.4803135386 | 186.0055566542 | 398.0585249452 |
| O  | 253.5533493128 | 186.1390740697 | 399.2710697446 |
| O  | 254.1278315396 | 186.7126908416 | 397.1557932333 |
| Mo | 255.5044568817 | 188.1749816046 | 396.8875649522 |
| C  | 253.4589030000 | 191.9933110000 | 399.2523550000 |
| C  | 254.2447589295 | 191.0572256926 | 398.3586462958 |
| S  | 253.9262230245 | 189.3278587437 | 398.4531374548 |

|    |                |                |                |
|----|----------------|----------------|----------------|
| C  | 255.1420736741 | 191.5308150095 | 397.4738344823 |
| S  | 256.3406425446 | 190.4886902752 | 396.7148717891 |
| C  | 255.0794330000 | 192.9368540000 | 396.9763790000 |
| C  | 260.3074000000 | 187.3173200000 | 397.1302730000 |
| C  | 258.8279630701 | 187.3109068184 | 397.5301991715 |
| S  | 257.7752598064 | 187.6319718857 | 396.1625895448 |
| C  | 258.2545646976 | 187.0694339128 | 398.7596018563 |
| S  | 256.5421711904 | 187.2560569363 | 399.0067592636 |
| C  | 258.9145050000 | 186.6286820000 | 400.0605640000 |
| O  | 252.1604185206 | 189.3234741325 | 393.5125573502 |
| O  | 255.1876632465 | 188.0962756583 | 395.1897611859 |
| O  | 251.1608123518 | 187.0357323045 | 394.6115914136 |
| H  | 257.1758535807 | 191.6681377354 | 393.3783709643 |
| H  | 257.5486525345 | 190.1417907218 | 392.6174821668 |
| H  | 255.3866642559 | 189.7262313662 | 393.7977426102 |
| H  | 253.9215612916 | 189.9495064332 | 392.9330361111 |
| H  | 257.8017802409 | 191.2857909785 | 390.3766030023 |
| H  | 251.3153146301 | 184.5883431692 | 399.0921865346 |
| H  | 251.8688744056 | 185.5067025017 | 396.7594181964 |
| H  | 253.2180119944 | 184.4109605564 | 396.6668482127 |
| H  | 254.0260200357 | 192.9001646033 | 399.4792935095 |
| H  | 260.4954856463 | 186.6249592564 | 396.3015444148 |
| H  | 258.4557953558 | 185.6977229855 | 400.4097995504 |
| H  | 258.7690617832 | 187.3807932196 | 400.8427940048 |
| H  | 259.9936596123 | 186.4579509029 | 399.9493612165 |
| H  | 256.0626683645 | 193.4299366545 | 396.9442316639 |
| H  | 254.4091177049 | 193.5655584341 | 397.5670729549 |
| H  | 253.2358997053 | 191.4967481221 | 400.2037589633 |
| H  | 257.3361378495 | 192.8184545865 | 391.0987299502 |
| H  | 258.8752419953 | 192.0484528781 | 391.5751251209 |
| H  | 260.6060273382 | 188.3183966816 | 396.7996373102 |
| H  | 260.9531460038 | 187.0282220888 | 397.9682200113 |
| H  | 251.2785889003 | 183.2976997443 | 397.8681417775 |
| H  | 252.6702946323 | 183.4723654026 | 398.9644024641 |
| Cl | 252.2391458117 | 188.2345667749 | 394.7197113551 |
| H  | 252.4931501839 | 192.2893255414 | 398.8175920276 |
| H  | 254.7003736137 | 192.9322677907 | 395.9455051952 |

### **TS1Cl(O-O)**

|   |                |                |                |
|---|----------------|----------------|----------------|
| C | 257.8290000000 | 191.8650000000 | 391.3050000000 |
| C | 257.3944859300 | 190.8121678400 | 392.3371067400 |
| C | 257.4104824900 | 189.3878758000 | 391.7606708000 |
| O | 257.9848076700 | 189.1388097300 | 390.6941065300 |

|    |                |                |                |
|----|----------------|----------------|----------------|
| N  | 256.7731371100 | 188.4517844100 | 392.4960549200 |
| C  | 251.8411914600 | 183.9704919300 | 398.3534991400 |
| C  | 252.5552728300 | 184.8160487600 | 397.2919645400 |
| C  | 253.4266553600 | 185.9475479400 | 397.8765923900 |
| O  | 253.3926270800 | 186.2138557200 | 399.0740238600 |
| O  | 254.1313378200 | 186.5392265700 | 396.9466163400 |
| Mo | 255.4904951500 | 188.1601576500 | 396.9890591400 |
| C  | 253.4590000000 | 191.9940000000 | 399.2530000000 |
| C  | 254.1453007400 | 191.0291707700 | 398.2973642100 |
| S  | 254.0278195300 | 189.2890529900 | 398.5849569300 |
| C  | 254.8737763900 | 191.4850036400 | 397.2537516400 |
| S  | 255.6712760900 | 190.3992135800 | 396.1377914400 |
| C  | 255.0790000000 | 192.9360000000 | 396.9760000000 |
| C  | 260.3070000000 | 187.3170000000 | 397.1300000000 |
| C  | 258.8410522000 | 187.3845357400 | 397.5620413300 |
| S  | 257.7968515800 | 187.9640391000 | 396.2612277600 |
| C  | 258.2654925700 | 187.0847044700 | 398.7626095700 |
| S  | 256.5093554100 | 187.2419496600 | 398.9581777700 |
| C  | 258.9150000000 | 186.6290000000 | 400.0610000000 |
| O  | 256.5964762600 | 185.2558638700 | 393.5461301900 |
| O  | 255.2987940000 | 187.8733285100 | 394.9271083600 |
| O  | 254.5530722300 | 184.1155187300 | 394.4759119800 |
| H  | 256.4031791300 | 191.0334288500 | 392.7495706800 |
| H  | 258.0688169200 | 190.8202785900 | 393.2035535300 |
| H  | 256.3375144800 | 188.5944980500 | 393.4086577000 |
| H  | 256.8613415300 | 187.4821796700 | 392.2231320600 |
| H  | 258.7949770900 | 191.5899166600 | 390.8735125900 |
| H  | 251.2477611500 | 184.6090943200 | 399.0148654400 |
| H  | 251.8289915300 | 185.2945821100 | 396.6217116900 |
| H  | 253.1837541300 | 184.2022756000 | 396.6376904000 |
| H  | 254.1787418900 | 192.6444141800 | 399.7686909900 |
| H  | 260.4205047500 | 186.6466621500 | 396.2698488800 |
| H  | 258.4957900700 | 185.6709484600 | 400.3915202700 |
| H  | 258.7284331700 | 187.3564223700 | 400.8605354200 |
| H  | 260.0019030100 | 186.5057433600 | 399.9603061500 |
| H  | 256.1463000900 | 193.1987713000 | 397.0048596900 |
| H  | 254.5618126700 | 193.5886142000 | 397.6863757600 |
| H  | 252.9093279900 | 191.4436441900 | 400.0238545200 |
| H  | 257.1124134800 | 191.9222417500 | 390.4785317300 |
| H  | 257.9062953300 | 192.8558660100 | 391.7668412800 |
| H  | 260.6653942300 | 188.3064574100 | 396.8223177000 |
| H  | 260.9572078800 | 186.9517852100 | 397.9358836100 |
| H  | 251.1831264600 | 183.2235101100 | 397.8909242600 |
| H  | 252.5674326500 | 183.4479810500 | 398.9853120900 |

|    |                |                |                |
|----|----------------|----------------|----------------|
| Cl | 255.5407935100 | 185.2584001800 | 394.6349641200 |
| O  | 254.5206380500 | 186.7491298900 | 394.3101392800 |
| H  | 252.7392153400 | 192.6426442700 | 398.7353833100 |
| H  | 254.7279913400 | 193.2060864100 | 395.9691857600 |

## Int2Cl(O-O)

|    |                |                |                |
|----|----------------|----------------|----------------|
| C  | 257.8289900000 | 191.8649720000 | 391.3050180000 |
| C  | 257.3721108186 | 190.7331037694 | 392.2333735089 |
| C  | 256.7099192225 | 189.5773929377 | 391.4576977969 |
| O  | 256.8546494811 | 189.4748797940 | 390.2350141788 |
| N  | 256.0062815587 | 188.7138925856 | 392.2155124237 |
| C  | 251.8412840000 | 183.9705860000 | 398.3534410000 |
| C  | 252.7266954342 | 184.7105432659 | 397.3410822851 |
| C  | 253.4791876887 | 185.9102882853 | 397.9325336380 |
| O  | 253.4514377568 | 186.1724879594 | 399.1310586381 |
| O  | 254.1418636691 | 186.5732326300 | 397.0081474813 |
| Mo | 255.5015593441 | 188.1304216366 | 397.0735736915 |
| C  | 253.4590050000 | 191.9940430000 | 399.2530520000 |
| C  | 254.2294953567 | 191.0345395780 | 398.3686031057 |
| S  | 254.0968257438 | 189.3188742202 | 398.7205256007 |
| C  | 255.0401005723 | 191.4890000366 | 397.3815025555 |
| S  | 256.1724329412 | 190.4294937829 | 396.5661033146 |
| C  | 255.0789740000 | 192.9358990000 | 396.9759750000 |
| C  | 260.3069290000 | 187.3169980000 | 397.1300020000 |
| C  | 258.8251509377 | 187.3031306217 | 397.5330698413 |
| S  | 257.7424130584 | 187.7229719427 | 396.2055522794 |
| C  | 258.2604779424 | 187.0283678780 | 398.7506076708 |
| S  | 256.5180721869 | 187.1214800683 | 398.9774699904 |
| C  | 258.9150090000 | 186.6289940000 | 400.0610120000 |
| O  | 254.4493795828 | 186.1560434358 | 391.9746332706 |
| O  | 255.1665205707 | 187.9781752264 | 394.9815786105 |
| O  | 253.0843581583 | 184.4197841477 | 393.5013796682 |
| H  | 256.6891826627 | 191.1007401275 | 393.0089383894 |
| H  | 258.2315364498 | 190.3164631605 | 392.7761989080 |
| H  | 255.9192609939 | 188.8090859322 | 393.2199324218 |
| H  | 255.5621817364 | 187.8795826624 | 391.8297107896 |
| H  | 258.4602702096 | 191.4623636790 | 390.5085005746 |
| H  | 251.0569086580 | 184.6300850818 | 398.7395340611 |
| H  | 252.1525359066 | 185.0631176394 | 396.4777147180 |
| H  | 253.4795689168 | 184.0396903963 | 396.9096374830 |
| H  | 254.0947872265 | 192.8161992402 | 399.6038708132 |
| H  | 260.4771051271 | 186.6565873138 | 396.2725886786 |
| H  | 258.4854460957 | 185.6927337210 | 400.4344456957 |

|    |                |                |                |
|----|----------------|----------------|----------------|
| H  | 258.7499998929 | 187.3945602690 | 400.8277111069 |
| H  | 259.9979997004 | 186.4844847085 | 399.9547811937 |
| H  | 255.9468123220 | 193.4654936596 | 397.3992460111 |
| H  | 254.1790118520 | 193.4752290805 | 397.2872365560 |
| H  | 253.0668424960 | 191.4758241427 | 400.1332910367 |
| H  | 256.9702382564 | 192.3432677820 | 390.8219194222 |
| H  | 258.3850711890 | 192.6301130252 | 391.8592775806 |
| H  | 260.6115844706 | 188.3275838723 | 396.8365557180 |
| H  | 260.9521377391 | 186.9866978585 | 397.9526382362 |
| H  | 251.3669243164 | 183.0978156308 | 397.8895503952 |
| H  | 252.4322407150 | 183.6392890123 | 399.2130875886 |
| Cl | 253.8631347487 | 185.8138737594 | 393.4341193553 |
| O  | 253.9968655793 | 188.5819661552 | 395.0930488042 |
| H  | 252.5998865118 | 192.4410433948 | 398.7317811348 |
| H  | 255.1572268532 | 193.0263042434 | 395.8868359221 |

### **TS2Cl(o-o)**

|    |                |                |                |
|----|----------------|----------------|----------------|
| C  | 257.8289450000 | 191.8649240000 | 391.3050560000 |
| C  | 257.2732230000 | 190.7937910000 | 392.2529620000 |
| C  | 256.3235940000 | 189.8240780000 | 391.5344550000 |
| O  | 256.1703570000 | 189.8712710000 | 390.3081040000 |
| N  | 255.6960280000 | 188.9327130000 | 392.3288270000 |
| C  | 251.8414800000 | 183.9707720000 | 398.3533320000 |
| C  | 252.6707010000 | 184.7073310000 | 397.3052110000 |
| C  | 253.4385210000 | 185.9171300000 | 397.8710360000 |
| O  | 253.3764790000 | 186.1998590000 | 399.0624950000 |
| O  | 254.1026160000 | 186.5340390000 | 396.9332120000 |
| Mo | 255.4931440000 | 188.1133900000 | 396.9297890000 |
| C  | 253.4590040000 | 191.9940900000 | 399.2530890000 |
| C  | 254.1567680000 | 191.0276040000 | 398.2960590000 |
| S  | 254.0341490000 | 189.2846540000 | 398.5523140000 |
| C  | 254.9186380000 | 191.4843070000 | 397.2771130000 |
| S  | 255.8174410000 | 190.4178030000 | 396.2254280000 |
| C  | 255.0789620000 | 192.9357490000 | 396.9759540000 |
| C  | 260.3067490000 | 187.3169860000 | 397.1300150000 |
| C  | 258.8341640000 | 187.3323830000 | 397.5429990000 |
| S  | 257.7910290000 | 187.8198010000 | 396.2014750000 |
| C  | 258.2559500000 | 187.0364730000 | 398.7447410000 |
| S  | 256.4965510000 | 187.1404640000 | 398.9271190000 |
| C  | 258.9150510000 | 186.6289720000 | 400.0610540000 |
| O  | 254.0462660000 | 185.0162980000 | 392.6806130000 |
| O  | 255.3047460000 | 187.8998280000 | 394.9915320000 |
| H  | 256.7513830000 | 191.2401160000 | 393.1085630000 |



|    |                |                |                |
|----|----------------|----------------|----------------|
| H  | 258.0882070000 | 190.2045150000 | 392.6931700000 |
| H  | 255.7850820000 | 188.8567240000 | 393.3428620000 |
| H  | 255.0794930000 | 188.2552730000 | 391.9040450000 |
| H  | 258.3251140000 | 191.3970460000 | 390.4502870000 |
| H  | 251.1072250000 | 184.6451670000 | 398.8047040000 |
| H  | 252.0429650000 | 185.0705960000 | 396.4831890000 |
| H  | 253.4066900000 | 184.0384650000 | 396.8412710000 |
| H  | 254.1713490000 | 192.6894070000 | 399.7156110000 |
| H  | 260.4578120000 | 186.6504370000 | 396.2726650000 |
| H  | 258.5043690000 | 185.6776880000 | 400.4190710000 |
| H  | 258.7202080000 | 187.3792770000 | 400.8362630000 |
| H  | 260.0026460000 | 186.5153220000 | 399.9614690000 |
| H  | 256.0457050000 | 193.3251940000 | 397.3322430000 |
| H  | 254.2945420000 | 193.5514880000 | 397.4291860000 |
| H  | 252.9638400000 | 191.4433310000 | 400.0587500000 |
| H  | 257.0208620000 | 192.4846810000 | 390.9039070000 |
| H  | 258.5428620000 | 192.5141070000 | 391.8249080000 |
| H  | 260.6336130000 | 188.3183840000 | 396.8264790000 |
| H  | 260.9590490000 | 186.9761880000 | 397.9445190000 |
| H  | 251.3114010000 | 183.1147900000 | 397.9162140000 |
| H  | 252.4801350000 | 183.6119170000 | 399.1662360000 |
| Cl | 253.9226840000 | 185.5782490000 | 394.1720250000 |
| O  | 253.9873760000 | 187.3348900000 | 394.3384440000 |
| H  | 252.6916320000 | 192.5950590000 | 398.7452000000 |
| H  | 255.0545480000 | 193.1198930000 | 395.8947490000 |

### Int3Cl(O-O)

|    |                |                |                |
|----|----------------|----------------|----------------|
| C  | 257.8289450000 | 191.8649240000 | 391.3050560000 |
| C  | 257.1568911250 | 190.9221868625 | 392.3078329080 |
| C  | 256.0190918898 | 190.1241187186 | 391.6616419748 |
| O  | 255.8138103279 | 190.1565749955 | 390.4473425504 |
| N  | 255.2635678601 | 189.3924436257 | 392.5165446813 |
| C  | 251.8414800000 | 183.9707720000 | 398.3533320000 |
| C  | 252.7136028817 | 184.7474714073 | 397.3553797324 |
| C  | 253.5160121547 | 185.9105303065 | 397.9705656443 |
| O  | 253.4207210807 | 186.2042586742 | 399.1584652663 |
| O  | 254.2760258372 | 186.5008567058 | 397.0829324887 |
| Mo | 255.5013423275 | 188.1985971955 | 397.0335172250 |
| C  | 253.4590040000 | 191.9940900000 | 399.2530890000 |
| C  | 254.2866500008 | 191.0338361837 | 398.4195572951 |
| S  | 254.2693187716 | 189.3551106576 | 398.8634615267 |
| C  | 255.1115919568 | 191.4996925001 | 397.4306658756 |
| S  | 256.3088370884 | 190.4602708630 | 396.7106508222 |

|    |                |                |                |
|----|----------------|----------------|----------------|
| C  | 255.0789620000 | 192.9357490000 | 396.9759540000 |
| C  | 260.3067490000 | 187.3169860000 | 397.1300150000 |
| C  | 258.8196411350 | 187.3168796959 | 397.5320896318 |
| S  | 257.7423795175 | 187.7337326355 | 396.2023850352 |
| C  | 258.2475054807 | 187.0290835638 | 398.7511428116 |
| S  | 256.5091462802 | 187.0577944937 | 398.9580615467 |
| C  | 258.9150510000 | 186.6289720000 | 400.0610540000 |
| O  | 244.8993191935 | 172.0038494226 | 382.9019983839 |
| O  | 255.0497654911 | 188.1448296406 | 395.0840171437 |
| H  | 256.7660055784 | 191.4677681693 | 393.1757768035 |
| H  | 257.8825252105 | 190.2066383161 | 392.7172285333 |
| H  | 255.4445627509 | 189.2553518528 | 393.5096749772 |
| H  | 254.5568038666 | 188.7979222371 | 392.1104658243 |
| H  | 258.1990486942 | 191.3031912981 | 390.4439289817 |
| H  | 251.1258408651 | 184.6403181995 | 398.8396081118 |
| H  | 252.1050431640 | 185.1757007470 | 396.5492745789 |
| H  | 253.4309149538 | 184.0834920058 | 396.8574804475 |
| H  | 254.0649827074 | 192.8351108095 | 399.6071480054 |
| H  | 260.4677931752 | 186.6702647695 | 396.2610442680 |
| H  | 258.4655208804 | 185.7095753223 | 400.4494405137 |
| H  | 258.7761913259 | 187.4103124389 | 400.8156563773 |
| H  | 259.9919495955 | 186.4592807517 | 399.9412300703 |
| H  | 256.0318531031 | 193.4476232674 | 397.1703056419 |
| H  | 254.2852405659 | 193.5089402517 | 397.4585897909 |
| H  | 253.0451641000 | 191.4850833814 | 400.1278668620 |
| H  | 257.1137489929 | 192.5998177055 | 390.9241993056 |
| H  | 258.6648099077 | 192.3986391430 | 391.7702037452 |
| H  | 260.6303247104 | 188.3281181051 | 396.8609712102 |
| H  | 260.9400091812 | 186.9582564190 | 397.9484824039 |
| H  | 251.2885492466 | 183.1684077545 | 397.8514277971 |
| H  | 252.4571003898 | 183.5309176625 | 399.1440091916 |
| Cl | 245.7091056017 | 173.2521448342 | 383.7933338187 |
| O  | 254.0014219490 | 188.7637304854 | 395.8063760511 |
| H  | 252.6142612229 | 192.4028589187 | 398.6838631885 |
| H  | 254.9106984826 | 192.9854788461 | 395.8938739994 |

## React<sub>N</sub>

|   |                |                |                |
|---|----------------|----------------|----------------|
| C | 257.8290000000 | 191.8650000000 | 391.3050000000 |
| C | 257.3240940242 | 190.8183259728 | 392.2991267695 |
| C | 256.4484969032 | 189.7598683302 | 391.6145713359 |
| O | 256.5010912040 | 189.5726448293 | 390.3939500304 |
| N | 255.6452881505 | 189.0683813849 | 392.4474488528 |
| C | 251.9230000000 | 184.0210000000 | 398.3810000000 |

|    |                |                |                |
|----|----------------|----------------|----------------|
| C  | 252.5356262932 | 184.9153042026 | 397.3075797226 |
| C  | 253.3951740917 | 186.0446635398 | 397.8999613110 |
| O  | 253.4565746972 | 186.2188433681 | 399.1147937674 |
| O  | 253.9896857126 | 186.7184561273 | 396.9594640196 |
| Mo | 255.5146660088 | 188.1491413613 | 397.0332036586 |
| C  | 253.4590000000 | 191.9940000000 | 399.2530000000 |
| C  | 254.1505026475 | 191.0314956682 | 398.2990386703 |
| S  | 254.1129783722 | 189.3079850143 | 398.6568885900 |
| C  | 254.8491012032 | 191.4793528913 | 397.2286926416 |
| S  | 255.6802692918 | 190.3641437180 | 396.1558346697 |
| C  | 255.0790000000 | 192.9360000000 | 396.9760000000 |
| C  | 260.3070000000 | 187.3170000000 | 397.1300000000 |
| C  | 258.8396729796 | 187.3726348188 | 397.5571311725 |
| S  | 257.7928549586 | 187.9691216855 | 396.2619855274 |
| C  | 258.2673140591 | 187.0633992991 | 398.7557364609 |
| S  | 256.5055504120 | 187.1939743590 | 398.9522613730 |
| C  | 258.9150000000 | 186.6290000000 | 400.0610000000 |
| O  | 254.5371787823 | 186.3907204152 | 393.2176628041 |
| O  | 255.1563198789 | 187.6394706669 | 394.8857875820 |
| O  | 255.5514786547 | 185.4718571660 | 394.9245121651 |
| H  | 256.7785117491 | 191.2736505642 | 393.1338311091 |
| H  | 258.1686018533 | 190.2882994585 | 392.7598350454 |
| H  | 255.6861192337 | 189.1515404991 | 393.4570056882 |
| H  | 255.1735997075 | 188.2299370780 | 392.1301042206 |
| H  | 258.3045466911 | 191.3713205415 | 390.4533651429 |
| H  | 251.3194866237 | 184.6138537870 | 399.0754149731 |
| H  | 251.7601274891 | 185.3802406676 | 396.6848914735 |
| H  | 253.1711398794 | 184.3491454066 | 396.6170820209 |
| H  | 254.1808751928 | 192.6402748724 | 399.7739316705 |
| H  | 260.4251952114 | 186.6550210830 | 396.2639538683 |
| H  | 258.5044273268 | 185.6711210281 | 400.4029595833 |
| H  | 258.7188247813 | 187.3647841427 | 400.8507515751 |
| H  | 260.0037519461 | 186.5140425371 | 399.9670650681 |
| H  | 255.8948813494 | 193.3302157539 | 397.6028991859 |
| H  | 254.1911799992 | 193.5459316177 | 397.1930895426 |
| H  | 252.8950896827 | 191.4469041623 | 400.0148353162 |
| H  | 256.9993098721 | 192.4611294338 | 390.9087462639 |
| H  | 258.5462416360 | 192.5471240757 | 391.7762382817 |
| H  | 260.6622524861 | 188.3108877285 | 396.8325733784 |
| H  | 260.9570942329 | 186.9464696369 | 397.9336734419 |
| H  | 251.2909548657 | 183.2362097694 | 397.9430595585 |
| H  | 252.7075655408 | 183.5432863104 | 398.9764956793 |
| H  | 252.7573501375 | 192.6553275284 | 398.7252840515 |
| H  | 255.3603504231 | 193.1240990176 | 395.9340651461 |

|   |                |                |                |
|---|----------------|----------------|----------------|
| N | 255.0781090768 | 186.4578596088 | 394.3529977701 |
|---|----------------|----------------|----------------|

## TS<sub>N</sub>

|    |                |                |                |
|----|----------------|----------------|----------------|
| C  | 257.8290000000 | 191.8650000000 | 391.3050000000 |
| C  | 257.1417340000 | 190.9701220000 | 392.3472950000 |
| C  | 255.7861470000 | 190.4399320000 | 391.8586800000 |
| O  | 255.2954130000 | 190.8230590000 | 390.7904750000 |
| N  | 255.1876090000 | 189.5411740000 | 392.6703990000 |
| C  | 251.9230000000 | 184.0210000000 | 398.3810000000 |
| C  | 252.4693710000 | 184.9556560000 | 397.3090770000 |
| C  | 253.3805740000 | 186.0382520000 | 397.9019260000 |
| O  | 253.4515550000 | 186.2135150000 | 399.1133350000 |
| O  | 254.0060190000 | 186.6886370000 | 396.9606760000 |
| Mo | 255.5015950000 | 188.1300320000 | 396.9272770000 |
| C  | 253.4590000000 | 191.9940000000 | 399.2530000000 |
| C  | 254.2010470000 | 191.0362000000 | 398.3258860000 |
| S  | 254.0218380000 | 189.2999820000 | 398.5588680000 |
| C  | 254.9944380000 | 191.4946700000 | 397.3342550000 |
| S  | 255.9160650000 | 190.4383410000 | 396.2848550000 |
| C  | 255.0790000000 | 192.9360000000 | 396.9760000000 |
| C  | 260.3070000000 | 187.3170000000 | 397.1300000000 |
| C  | 258.8384440000 | 187.3310720000 | 397.5401900000 |
| S  | 257.8059890000 | 187.7959870000 | 396.1861450000 |
| C  | 258.2620880000 | 187.0403780000 | 398.7433160000 |
| S  | 256.5050750000 | 187.1586640000 | 398.9247800000 |
| C  | 258.9150000000 | 186.6290000000 | 400.0610000000 |
| O  | 253.0978600000 | 187.3246570000 | 393.8775520000 |
| O  | 255.2554010000 | 187.8484730000 | 395.0677890000 |
| O  | 254.4178570000 | 185.6203880000 | 394.1462670000 |
| H  | 256.9731940000 | 191.5098830000 | 393.2882050000 |
| H  | 257.7775480000 | 190.1186290000 | 392.6192900000 |
| H  | 255.5251970000 | 189.2370250000 | 393.5824990000 |
| H  | 254.2711890000 | 189.1961960000 | 392.4230700000 |
| H  | 258.0382300000 | 191.3038210000 | 390.3888060000 |
| H  | 251.4004820000 | 184.5923930000 | 399.1534140000 |
| H  | 251.6587460000 | 185.4688070000 | 396.7755920000 |
| H  | 253.0360660000 | 184.4184740000 | 396.5410820000 |
| H  | 254.1389280000 | 192.7240620000 | 399.7106950000 |
| H  | 260.4627850000 | 186.6484050000 | 396.2745900000 |
| H  | 258.4984290000 | 185.6789540000 | 400.4161490000 |
| H  | 258.7210560000 | 187.3785770000 | 400.8373650000 |
| H  | 260.0028490000 | 186.5102460000 | 399.9661630000 |
| H  | 256.1111490000 | 193.2430790000 | 396.7585980000 |

|   |                |                |                |
|---|----------------|----------------|----------------|
| H | 254.7006630000 | 193.5961380000 | 397.7638890000 |
| H | 252.9772320000 | 191.4404750000 | 400.0650000000 |
| H | 257.1759550000 | 192.6968640000 | 391.0269010000 |
| H | 258.7717500000 | 192.2645870000 | 391.6957000000 |
| H | 260.6330140000 | 188.3180570000 | 396.8235720000 |
| H | 260.9612630000 | 186.9805960000 | 397.9454930000 |
| H | 251.2332750000 | 183.2779140000 | 397.9586250000 |
| H | 252.7387980000 | 183.4887780000 | 398.8812220000 |
| H | 252.6740750000 | 192.5567830000 | 398.7278880000 |
| H | 254.4979120000 | 193.1534250000 | 396.0666690000 |
| N | 254.0587180000 | 186.7597930000 | 394.3908020000 |

## Intn

|    |                |                |                |
|----|----------------|----------------|----------------|
| C  | 257.8290000000 | 191.8650000000 | 391.3050000000 |
| C  | 257.0821594415 | 190.7888619063 | 392.1032947622 |
| C  | 255.9663401274 | 190.1285796758 | 391.2663646871 |
| O  | 255.8287701382 | 190.4324168861 | 390.0762410908 |
| N  | 255.1980073657 | 189.2307648768 | 391.9140198930 |
| C  | 251.9230000000 | 184.0210000000 | 398.3810000000 |
| C  | 252.5744171994 | 184.9926181555 | 397.4020383909 |
| C  | 253.5230192042 | 185.9852516306 | 398.0814704183 |
| O  | 253.6540713021 | 186.0609194739 | 399.2931694396 |
| O  | 254.1373118657 | 186.7150327841 | 397.1769567949 |
| Mo | 255.4951714933 | 188.1833070129 | 396.8531315147 |
| C  | 253.4590000000 | 191.9940000000 | 399.2530000000 |
| C  | 254.2271509615 | 191.0576700185 | 398.3455940690 |
| S  | 253.8818271105 | 189.3277207739 | 398.4027194359 |
| C  | 255.1356346936 | 191.5292095693 | 397.4716479224 |
| S  | 256.3457054785 | 190.4929369486 | 396.7259590150 |
| C  | 255.0790000000 | 192.9360000000 | 396.9760000000 |
| C  | 260.3070000000 | 187.3170000000 | 397.1300000000 |
| C  | 258.8236850960 | 187.3184196860 | 397.5274616240 |
| S  | 257.7682991337 | 187.6195745249 | 396.1625158497 |
| C  | 258.2521675312 | 187.0989418797 | 398.7678106328 |
| S  | 256.5537010446 | 187.3392816468 | 399.0185560748 |
| C  | 258.9150000000 | 186.6290000000 | 400.0610000000 |
| O  | 253.1979340409 | 187.6601570479 | 390.6069873892 |
| O  | 255.1810535725 | 188.1204029024 | 395.1621321928 |
| O  | 251.8855518141 | 186.0051400336 | 390.9887972430 |
| H  | 256.6505555709 | 191.2043115995 | 393.0234112115 |
| H  | 257.7754181673 | 190.0044598850 | 392.4362139656 |
| H  | 255.3528396389 | 189.0011353779 | 392.8879510722 |
| H  | 254.4640175196 | 188.6992542801 | 391.4085984889 |

|   |                |                |                |
|---|----------------|----------------|----------------|
| H | 258.2358525891 | 191.4391987158 | 390.3836954704 |
| H | 251.3821669671 | 184.5654022706 | 399.1611013022 |
| H | 251.8240978235 | 185.5857954391 | 396.8652770922 |
| H | 253.1384147596 | 184.4687621959 | 396.6222124687 |
| H | 254.0257763176 | 192.9049518102 | 399.4605609501 |
| H | 260.4952834335 | 186.6217502432 | 396.3046636399 |
| H | 258.4404374386 | 185.7018861059 | 400.3978604695 |
| H | 258.7884767317 | 187.3726419501 | 400.8541309074 |
| H | 259.9891282717 | 186.4395717530 | 399.9384357423 |
| H | 256.0587412888 | 193.4363667456 | 396.9712317611 |
| H | 254.3876444541 | 193.5597430719 | 397.5471862737 |
| H | 253.2666381980 | 191.5003411263 | 400.2128059424 |
| H | 257.1465318424 | 192.6668775275 | 391.0073525944 |
| H | 258.6465104168 | 192.2976132250 | 391.8947718992 |
| H | 260.6076077296 | 188.3167694224 | 396.7983604365 |
| H | 260.9468831192 | 187.0294616956 | 397.9721863271 |
| H | 251.2223610983 | 183.3533694251 | 397.8658884429 |
| H | 252.6790514246 | 183.4091929768 | 398.8842314819 |
| H | 252.4776053207 | 192.2826897255 | 398.8476880648 |
| H | 254.7311560618 | 192.9325204529 | 395.9341329431 |
| N | 252.7279554703 | 186.8216476963 | 391.4406577693 |

## ReactCl,T

|    |                |                |                |
|----|----------------|----------------|----------------|
| C  | 257.8290000000 | 191.8650000000 | 391.3050000000 |
| C  | 257.0888058344 | 191.1516472923 | 392.4357793964 |
| C  | 255.6851444323 | 190.7018243508 | 392.0052856045 |
| O  | 255.3560055556 | 190.6860294335 | 390.8150093027 |
| N  | 254.8743595919 | 190.3336266453 | 393.0194720954 |
| C  | 251.9230000000 | 184.0210000000 | 398.3810000000 |
| C  | 252.8307565564 | 184.7151639439 | 397.3678535984 |
| C  | 253.6500142171 | 185.8463159510 | 397.9917889877 |
| O  | 253.5638661414 | 186.1307143263 | 399.1807000563 |
| O  | 254.4246669608 | 186.4286108140 | 397.1050585450 |
| Mo | 255.5141796668 | 188.1456593343 | 397.1475001992 |
| C  | 253.4590000000 | 191.9940000000 | 399.2530000000 |
| C  | 254.1327500007 | 191.0332101248 | 398.2980673487 |
| S  | 253.7953379483 | 189.3114971344 | 398.5315320536 |
| C  | 254.9600244512 | 191.4837781464 | 397.3293641189 |
| S  | 256.0364678530 | 190.4189152315 | 396.4168104217 |
| C  | 255.0790000000 | 192.9360000000 | 396.9760000000 |
| C  | 260.3070000000 | 187.3170000000 | 397.1300000000 |
| C  | 258.8245780849 | 187.3132937893 | 397.5320843249 |
| S  | 257.7322693598 | 187.5646260731 | 396.1562351292 |

|    |                |                |                |
|----|----------------|----------------|----------------|
| C  | 258.3033323120 | 187.2046995483 | 398.7950023189 |
| S  | 256.6420970088 | 187.7067145067 | 399.1429967485 |
| C  | 258.9150000000 | 186.6290000000 | 400.0610000000 |
| O  | 252.7144522472 | 188.2404894564 | 393.2123694810 |
| O  | 254.3669780378 | 188.2288585265 | 394.9965657180 |
| O  | 253.5957953775 | 186.0867587059 | 394.0021773773 |
| H  | 257.0168553868 | 191.7753305443 | 393.3348453802 |
| H  | 257.6361033374 | 190.2532232979 | 392.7511203291 |
| H  | 255.2260933776 | 190.2296145708 | 393.9676990584 |
| H  | 254.0454286121 | 189.7845920016 | 392.8145301493 |
| H  | 257.8310056014 | 191.2417108516 | 390.4069788187 |
| H  | 251.2287322997 | 184.7401899459 | 398.8259696593 |
| H  | 252.2624159278 | 185.1603922511 | 396.5443976537 |
| H  | 253.5301576295 | 184.0115575655 | 396.8994889831 |
| H  | 253.8170943201 | 193.0206289280 | 399.1478392032 |
| H  | 260.5075351789 | 186.5981749293 | 396.3274155960 |
| H  | 258.3905319471 | 185.7047551306 | 400.3328011212 |
| H  | 258.8240822717 | 187.3173596170 | 400.9098425362 |
| H  | 259.9785774828 | 186.3842878930 | 399.9347170160 |
| H  | 255.9279567143 | 193.4311305825 | 397.4748414587 |
| H  | 254.1752702114 | 193.5052565270 | 397.2138320705 |
| H  | 253.6552464053 | 191.6799351308 | 400.2860695652 |
| H  | 257.3292462443 | 192.8034184184 | 391.0402940191 |
| H  | 258.8633071746 | 192.0927013577 | 391.5889124033 |
| H  | 260.5715577311 | 188.3121857141 | 396.7551896769 |
| H  | 260.9619359677 | 187.0832202396 | 397.9790375268 |
| H  | 251.3409260678 | 183.2174194124 | 397.9108799414 |
| H  | 252.5076445610 | 183.5945499010 | 399.2030325388 |
| Cl | 253.1717583541 | 187.4567743346 | 394.4203209090 |
| O  | 252.0654100380 | 187.3856909553 | 395.4183539980 |
| H  | 252.3650167469 | 191.9975723794 | 399.1346809469 |
| H  | 255.2495736866 | 193.0452339698 | 395.8980508611 |

## TS1<sub>Cl,T</sub>

|   |                |                |                |
|---|----------------|----------------|----------------|
| C | 257.8287910000 | 191.8648120000 | 391.3051340000 |
| C | 256.8013750000 | 191.6980370000 | 392.4281110000 |
| C | 255.6490490000 | 190.7807410000 | 391.9884800000 |
| O | 255.2624580000 | 190.7782360000 | 390.8136990000 |
| N | 255.1084700000 | 190.0319390000 | 392.9643380000 |
| C | 251.9232450000 | 184.0211840000 | 398.3809670000 |
| C | 253.1588540000 | 184.4550210000 | 397.6019510000 |
| C | 253.7412300000 | 185.7745630000 | 398.1289820000 |
| O | 253.4798630000 | 186.1859630000 | 399.2564130000 |

|    |                |                |                |
|----|----------------|----------------|----------------|
| O  | 254.5177940000 | 186.3296070000 | 397.2438850000 |
| Mo | 255.4857210000 | 188.1534090000 | 397.0603370000 |
| C  | 253.4589480000 | 191.9939070000 | 399.2528160000 |
| C  | 254.1407530000 | 191.0233980000 | 398.2907280000 |
| S  | 253.8009290000 | 189.2952130000 | 398.4519140000 |
| C  | 254.9657890000 | 191.4850830000 | 397.3182240000 |
| S  | 256.0050010000 | 190.4421370000 | 396.3618820000 |
| C  | 255.0791630000 | 192.9361500000 | 396.9761050000 |
| C  | 260.3070640000 | 187.3171530000 | 397.1300590000 |
| C  | 258.8289230000 | 187.3283130000 | 397.5363630000 |
| S  | 257.7506430000 | 187.5715290000 | 396.1560460000 |
| C  | 258.3035620000 | 187.2281300000 | 398.7996890000 |
| S  | 256.6482500000 | 187.7553140000 | 399.1196620000 |
| C  | 258.9147880000 | 186.6287950000 | 400.0609180000 |
| O  | 252.9777980000 | 188.0121260000 | 393.2832600000 |
| O  | 254.8900480000 | 187.8175130000 | 395.1310870000 |
| O  | 253.3066080000 | 185.8041590000 | 394.3172670000 |
| H  | 256.3599420000 | 192.6735430000 | 392.6758970000 |
| H  | 257.2625360000 | 191.3256640000 | 393.3488270000 |
| H  | 255.4478040000 | 190.0324160000 | 393.9212450000 |
| H  | 254.3553950000 | 189.3819250000 | 392.7669650000 |
| H  | 258.3543080000 | 190.9220120000 | 391.1174500000 |
| H  | 251.1112720000 | 184.7427720000 | 398.2417710000 |
| H  | 252.9504990000 | 184.5856020000 | 396.5363860000 |
| H  | 253.9523340000 | 183.6973390000 | 397.6722730000 |
| H  | 254.1654650000 | 192.7373350000 | 399.6394660000 |
| H  | 260.5019110000 | 186.5918680000 | 396.3315750000 |
| H  | 258.3764900000 | 185.7099520000 | 400.3224760000 |
| H  | 258.8355010000 | 187.3085690000 | 400.9175740000 |
| H  | 259.9740010000 | 186.3710360000 | 399.9262750000 |
| H  | 256.0660090000 | 193.3506060000 | 397.2323030000 |
| H  | 254.3226640000 | 193.5518220000 | 397.4721460000 |
| H  | 253.0475950000 | 191.4486430000 | 400.1072980000 |
| H  | 257.3165420000 | 192.1452670000 | 390.3809900000 |
| H  | 258.5768630000 | 192.6268130000 | 391.5541270000 |
| H  | 260.5791060000 | 188.3075480000 | 396.7479620000 |
| H  | 260.9639900000 | 187.0849280000 | 397.9780780000 |
| H  | 251.5629690000 | 183.0353990000 | 398.0573750000 |
| H  | 252.1417930000 | 183.9883360000 | 399.4525120000 |
| Cl | 253.2454900000 | 187.2782930000 | 394.5833860000 |
| O  | 252.1986730000 | 187.6072220000 | 395.5975070000 |
| H  | 252.6255820000 | 192.5361660000 | 398.7826840000 |
| H  | 254.9594610000 | 193.0767650000 | 395.8939840000 |

**Int1Cl,T**



|    |                |                |                |
|----|----------------|----------------|----------------|
| C  | 257.8287910000 | 191.8648120000 | 391.3051340000 |
| C  | 256.9401849415 | 191.1667186684 | 392.3432784973 |
| C  | 255.8072160499 | 190.3492762158 | 391.6880740974 |
| O  | 255.4763665421 | 190.5632470964 | 390.5177534214 |
| N  | 255.2220414839 | 189.4393089498 | 392.4915256940 |
| C  | 251.9232450000 | 184.0211840000 | 398.3809670000 |
| C  | 252.8389298094 | 184.7117221413 | 397.3653477229 |
| C  | 253.6023624008 | 185.9013732386 | 397.9466842930 |
| O  | 253.3676582723 | 186.3508042010 | 399.0650290875 |
| O  | 254.5021446838 | 186.3686556663 | 397.1092503319 |
| Mo | 255.4439087896 | 188.1786322345 | 396.8245570032 |
| C  | 253.4589480000 | 191.9939070000 | 399.2528160000 |
| C  | 254.2113310969 | 191.0232618070 | 398.3451969655 |
| S  | 253.8814368403 | 189.3203418673 | 398.4963045932 |
| C  | 255.1151193443 | 191.5084493836 | 397.4259711911 |
| S  | 256.2601189596 | 190.5192309288 | 396.5988871519 |
| C  | 255.0791630000 | 192.9361500000 | 396.9761050000 |
| C  | 260.3070640000 | 187.3171530000 | 397.1300590000 |
| C  | 258.8230000264 | 187.3432819185 | 397.5368885312 |
| S  | 257.8104586645 | 187.6724325857 | 396.1398704798 |
| C  | 258.2671879565 | 187.1930483315 | 398.7970547110 |
| S  | 256.5897287984 | 187.5592072236 | 399.0966402787 |
| C  | 258.9147880000 | 186.6287950000 | 400.0609180000 |
| O  | 252.9190978271 | 187.5000825283 | 392.5583691661 |
| O  | 255.0481664704 | 188.1688936763 | 395.1575129874 |
| O  | 253.1142235645 | 185.0507952716 | 393.0639344452 |
| H  | 256.4693378385 | 191.9104004543 | 393.0006970171 |
| H  | 257.5310922204 | 190.5229115302 | 393.0056233386 |
| H  | 255.5018817362 | 189.2884479402 | 393.4526478614 |
| H  | 254.4264833912 | 188.8714698968 | 392.1964731830 |
| H  | 258.3932942818 | 191.1311114666 | 390.7198413598 |
| H  | 251.2147239690 | 184.7395274344 | 398.8033774429 |
| H  | 252.2740220720 | 185.1008711414 | 396.5069891795 |
| H  | 253.5697833027 | 184.0146581071 | 396.9392301795 |
| H  | 254.1385746767 | 192.7392301663 | 399.6801110203 |
| H  | 260.4753668443 | 186.6266512579 | 396.2966042803 |
| H  | 258.4046159629 | 185.7018896103 | 400.3430052887 |
| H  | 258.8171425804 | 187.3269906873 | 400.8992766452 |
| H  | 259.9808348087 | 186.4015079020 | 399.9255389212 |
| H  | 256.0812174182 | 193.3213918595 | 396.7548241024 |
| H  | 254.6117917729 | 193.6116844621 | 397.6991387317 |
| H  | 252.9865576076 | 191.4509988085 | 400.0759964441 |
| H  | 257.2065884380 | 192.4255174765 | 390.6028794929 |

|    |                |                |                |
|----|----------------|----------------|----------------|
| H  | 258.5415229408 | 192.5444228183 | 391.7866977583 |
| H  | 260.6107385504 | 188.3169963447 | 396.8009971238 |
| H  | 260.9532058523 | 187.0186452056 | 397.9642886402 |
| H  | 251.3598802001 | 183.2078271032 | 397.9083394993 |
| H  | 252.4982752141 | 183.6071863515 | 399.2172034383 |
| Cl | 253.0372245225 | 186.4548695450 | 393.7070606042 |
| O  | 251.7438914539 | 186.5262535445 | 394.5502915595 |
| H  | 252.6656517852 | 192.5277936991 | 398.7129679051 |
| H  | 254.5027421574 | 193.0028075135 | 396.0438075237 |

## Int2b<sub>Cl,T</sub>

|    |                |                |                |
|----|----------------|----------------|----------------|
| C  | 257.8290000000 | 191.8650000000 | 391.3050000000 |
| C  | 257.1064960166 | 191.1637545875 | 392.4587122625 |
| C  | 255.5870685128 | 191.0828391505 | 392.2334803817 |
| O  | 255.0893106564 | 191.3464343707 | 391.1334200589 |
| N  | 254.8781041507 | 190.7059143660 | 393.3170084748 |
| C  | 251.9230000000 | 184.0210000000 | 398.3810000000 |
| C  | 252.8368955646 | 184.6991391507 | 397.3632717964 |
| C  | 253.6504949339 | 185.8466164664 | 397.9767866544 |
| O  | 253.6004026711 | 186.0963192662 | 399.1775682270 |
| O  | 254.3559759479 | 186.4681100489 | 397.0692897085 |
| Mo | 255.5293862370 | 188.1736375488 | 397.1221136569 |
| C  | 253.4590000000 | 191.9940000000 | 399.2530000000 |
| C  | 254.1926314407 | 191.0402574800 | 398.3394690925 |
| S  | 253.8378156854 | 189.3196384989 | 398.5513774117 |
| C  | 255.0574180203 | 191.5011710943 | 397.4088593644 |
| S  | 256.2166720102 | 190.4545765473 | 396.5785224603 |
| C  | 255.0790000000 | 192.9360000000 | 396.9760000000 |
| C  | 260.3070000000 | 187.3170000000 | 397.1300000000 |
| C  | 258.8225065953 | 187.2915438107 | 397.5227587362 |
| S  | 257.7371730185 | 187.5358388635 | 396.1375569266 |
| C  | 258.2915818044 | 187.1561894793 | 398.7803431985 |
| S  | 256.6110798112 | 187.5648679729 | 399.1183307485 |
| C  | 258.9150000000 | 186.6290000000 | 400.0610000000 |
| O  | 252.3122600374 | 189.5239289147 | 394.4709195693 |
| O  | 254.3973343075 | 188.3328500387 | 395.1380298105 |
| O  | 252.3181872971 | 187.0268215409 | 394.5277047530 |
| H  | 257.3050700833 | 191.6539956718 | 393.4192729694 |
| H  | 257.4764244383 | 190.1368202004 | 392.5772814243 |
| H  | 255.3221500549 | 190.3923522353 | 394.1767643764 |
| H  | 253.9034538812 | 190.4380850070 | 393.2331251757 |
| H  | 257.5761929610 | 191.3853614414 | 390.3557457465 |
| H  | 251.2045336066 | 184.7384153665 | 398.7893114488 |

|    |                |                |                |
|----|----------------|----------------|----------------|
| H  | 252.2785639270 | 185.1159174449 | 396.5170187127 |
| H  | 253.5471246374 | 183.9858970709 | 396.9253392079 |
| H  | 253.9858905092 | 192.9449186140 | 399.3739403386 |
| H  | 260.5194267198 | 186.6079136686 | 396.3211292815 |
| H  | 258.4060549983 | 185.7061451161 | 400.3644641904 |
| H  | 258.8138132491 | 187.3434723349 | 400.8863515598 |
| H  | 259.9832057880 | 186.3976228372 | 399.9434648176 |
| H  | 256.0355904523 | 193.4369398582 | 397.1943640728 |
| H  | 254.2774958840 | 193.5299226956 | 397.4226883310 |
| H  | 253.3593156123 | 191.5448356875 | 400.2478725505 |
| H  | 257.5158126586 | 192.9114814901 | 391.2264461456 |
| H  | 258.9159498386 | 191.8371865076 | 391.4455528593 |
| H  | 260.5659219689 | 188.3180621126 | 396.7670800300 |
| H  | 260.9595097817 | 187.0800153702 | 397.9802476814 |
| H  | 251.3661240503 | 183.1886834511 | 397.9303281439 |
| H  | 252.5033764324 | 183.6399340845 | 399.2269755838 |
| Cl | 252.8005581642 | 188.2870257700 | 395.2412898094 |
| H  | 252.4373223159 | 192.2128849620 | 398.9062280215 |
| H  | 254.9482608027 | 192.9832279440 | 395.8864969795 |

## TS<sub>2Cl,T</sub>

|    |                |                |                |
|----|----------------|----------------|----------------|
| C  | 257.8290000000 | 191.8650000000 | 391.3050000000 |
| C  | 257.1245090000 | 191.1585690000 | 392.4656250000 |
| C  | 255.6260490000 | 190.9580890000 | 392.1955840000 |
| O  | 255.1252950000 | 191.2583880000 | 391.1064900000 |
| N  | 254.9286670000 | 190.4467450000 | 393.2313060000 |
| C  | 251.9230000000 | 184.0210000000 | 398.3810000000 |
| C  | 253.0001340000 | 184.5315650000 | 397.4317130000 |
| C  | 253.6534290000 | 185.8262660000 | 397.9450190000 |
| O  | 253.4796290000 | 186.1919100000 | 399.1062450000 |
| O  | 254.3608140000 | 186.4071350000 | 397.0249870000 |
| Mo | 255.5106820000 | 188.2080880000 | 397.0315430000 |
| C  | 253.4590000000 | 191.9940000000 | 399.2530000000 |
| C  | 254.1900990000 | 191.0420120000 | 398.3239420000 |
| S  | 253.8261330000 | 189.3168100000 | 398.4629610000 |
| C  | 255.0858140000 | 191.5102180000 | 397.4238560000 |
| S  | 256.2782730000 | 190.4809230000 | 396.6332730000 |
| C  | 255.0790000000 | 192.9360000000 | 396.9760000000 |
| C  | 260.3070000000 | 187.3170000000 | 397.1300000000 |
| C  | 258.8246550000 | 187.2884550000 | 397.5213280000 |
| S  | 257.7559680000 | 187.5248440000 | 396.1194280000 |
| C  | 258.2815880000 | 187.1309880000 | 398.7686810000 |
| S  | 256.5728110000 | 187.4633370000 | 399.0733930000 |

|    |                |                |                |
|----|----------------|----------------|----------------|
| C  | 258.9150000000 | 186.6290000000 | 400.0610000000 |
| O  | 252.5412320000 | 188.7758970000 | 393.9946910000 |
| O  | 254.8879300000 | 188.1502460000 | 395.1401900000 |
| O  | 253.3426400000 | 186.3986020000 | 393.7751180000 |
| H  | 257.2464600000 | 191.7069540000 | 393.4077780000 |
| H  | 257.5685450000 | 190.1717070000 | 392.6492910000 |
| H  | 255.3740480000 | 190.0870690000 | 394.0709070000 |
| H  | 253.9844080000 | 190.1088540000 | 393.0867180000 |
| H  | 257.6811550000 | 191.3092160000 | 390.3749750000 |
| H  | 251.1037790000 | 184.7434730000 | 398.4600840000 |
| H  | 252.6071500000 | 184.7183360000 | 396.4260960000 |
| H  | 253.8000660000 | 183.7896750000 | 397.3052580000 |
| H  | 254.0468790000 | 192.8924380000 | 399.4633680000 |
| H  | 260.5158890000 | 186.6157500000 | 396.3131490000 |
| H  | 258.4169470000 | 185.7052080000 | 400.3784500000 |
| H  | 258.8029590000 | 187.3554950000 | 400.8745250000 |
| H  | 259.9862570000 | 186.4125690000 | 399.9453100000 |
| H  | 256.0527950000 | 193.4337860000 | 397.1027310000 |
| H  | 254.3233420000 | 193.5420590000 | 397.4832070000 |
| H  | 253.2654490000 | 191.4938100000 | 400.2084180000 |
| H  | 257.4108180000 | 192.8642410000 | 391.1466710000 |
| H  | 258.9040390000 | 191.9613160000 | 391.4970360000 |
| H  | 260.5701940000 | 188.3202500000 | 396.7760320000 |
| H  | 260.9615900000 | 187.0695440000 | 397.9760110000 |
| H  | 251.5048250000 | 183.0617650000 | 398.0467740000 |
| H  | 252.3343690000 | 183.9013510000 | 399.3869810000 |
| Cl | 253.1656860000 | 187.5766330000 | 394.7186550000 |
| H  | 252.4800450000 | 192.3128390000 | 398.8622880000 |
| H  | 254.8555340000 | 192.9714190000 | 395.9008180000 |

### **Int3<sub>Cl,T</sub>**

|    |                |                |                |
|----|----------------|----------------|----------------|
| C  | 257.8290000000 | 191.8650000000 | 391.3050000000 |
| C  | 257.0477684510 | 191.1003805458 | 392.3797019124 |
| C  | 255.5640184536 | 190.9333688059 | 392.0028302977 |
| O  | 255.1039229802 | 191.4850639394 | 390.9980376411 |
| N  | 254.8405876737 | 190.1665830256 | 392.8431785775 |
| C  | 251.9230000000 | 184.0210000000 | 398.3810000000 |
| C  | 252.9628175047 | 184.5687301765 | 397.4037319765 |
| C  | 253.6178546129 | 185.8745322081 | 397.8869785919 |
| O  | 253.3461220311 | 186.3464314922 | 398.9903402900 |
| O  | 254.4378333303 | 186.3608336128 | 397.0025304265 |
| Mo | 255.4641593829 | 188.2128940782 | 396.8255699792 |
| C  | 253.4590000000 | 191.9940000000 | 399.2530000000 |

|    |                |                |                |
|----|----------------|----------------|----------------|
| C  | 254.2283382241 | 191.0302181818 | 398.3521215642 |
| S  | 253.9238313962 | 189.3161692859 | 398.5144990533 |
| C  | 255.1251549193 | 191.5153006186 | 397.4356772117 |
| S  | 256.3078606327 | 190.5283215215 | 396.6329760860 |
| C  | 255.0790000000 | 192.9360000000 | 396.9760000000 |
| C  | 260.3070000000 | 187.3170000000 | 397.1300000000 |
| C  | 258.8212292985 | 187.3156236834 | 397.5318803256 |
| S  | 257.7966612103 | 187.6570307682 | 396.1313285221 |
| C  | 258.2570656478 | 187.1334246463 | 398.7767144846 |
| S  | 256.5544660001 | 187.4307394452 | 399.0608086943 |
| C  | 258.9150000000 | 186.6290000000 | 400.0610000000 |
| O  | 252.0517942004 | 189.2284893770 | 392.9490560578 |
| O  | 254.9038980826 | 188.2043099198 | 395.1957260637 |
| O  | 251.2135085833 | 186.6798060664 | 393.0904915217 |
| H  | 257.1018453386 | 191.6143519163 | 393.3486037475 |
| H  | 257.4851813864 | 190.1089347181 | 392.5538444316 |
| H  | 255.2391221439 | 189.7136813539 | 393.6572865490 |
| H  | 253.8501898653 | 189.9744606569 | 392.6709877246 |
| H  | 257.8110986017 | 191.3225739106 | 390.3546880016 |
| H  | 251.1174617791 | 184.7465407041 | 398.5284632537 |
| H  | 252.5206128577 | 184.7689740475 | 396.4207913705 |
| H  | 253.7657184487 | 183.8410820379 | 397.2267359111 |
| H  | 254.1127822396 | 192.7841620194 | 399.6371294080 |
| H  | 260.4918678548 | 186.6314503377 | 396.2949174788 |
| H  | 258.4319075294 | 185.6977884182 | 400.3756871084 |
| H  | 258.7925687995 | 187.3534355489 | 400.8736284108 |
| H  | 259.9886162412 | 186.4308540093 | 399.9370928491 |
| H  | 256.0821489966 | 193.3609866395 | 396.8417755251 |
| H  | 254.5221999425 | 193.5956047078 | 397.6482720033 |
| H  | 253.0404164193 | 191.4540297858 | 400.1074158336 |
| H  | 257.3683149843 | 192.8397333042 | 391.1216760629 |
| H  | 258.8728466466 | 192.0123805547 | 391.6069695132 |
| H  | 260.5999446421 | 188.3218484982 | 396.8052531643 |
| H  | 260.9532933066 | 187.0237448731 | 397.9664356103 |
| H  | 251.4854422074 | 183.0828768923 | 398.0156516587 |
| H  | 252.3736202069 | 183.8427602278 | 399.3624483403 |
| Cl | 252.1850269823 | 187.8028468013 | 393.6731411980 |
| H  | 252.6214526373 | 192.4707302537 | 398.7260820012 |
| H  | 254.5890262068 | 192.9769603310 | 395.9938390232 |

## The Mo-perchlorate complex optimized using the bigger model

|    |                |                |                |
|----|----------------|----------------|----------------|
| Mo | 255.3426467622 | 188.1319885354 | 397.1631604495 |
| P  | 253.3503101536 | 192.4813559380 | 404.4682840659 |
| O  | 254.3281589871 | 193.4942089739 | 403.9404156111 |
| O  | 253.7723604041 | 191.2232229871 | 405.1651000720 |
| O  | 252.4016552480 | 191.9218685367 | 403.1280246228 |
| O  | 252.9132761083 | 193.3203909207 | 401.0498530370 |
| P  | 251.7562949441 | 192.8534081325 | 402.0171204109 |
| O  | 250.9471261955 | 194.0098697143 | 402.5145578601 |
| O  | 250.8242032011 | 191.8196665563 | 401.1857603191 |
| O  | 252.1493765417 | 193.1651079425 | 405.3269893107 |
| C  | 253.8004126477 | 192.3318995748 | 400.4266635397 |
| C  | 253.4480223715 | 192.2695380757 | 398.9479426899 |
| O  | 253.6653456093 | 193.6088872090 | 398.4722833127 |
| C  | 254.1750777261 | 191.1894353916 | 398.1883014400 |
| S  | 253.9910806666 | 189.5149385757 | 398.6967770535 |
| C  | 254.8822861862 | 191.4826592560 | 397.0783074551 |
| S  | 255.5859282330 | 190.2325254122 | 396.0993446541 |
| C  | 255.2221385092 | 192.8989820317 | 396.7102486263 |
| N  | 256.4459903480 | 193.2948210131 | 397.4306781652 |
| C  | 256.6660989921 | 194.6841670127 | 397.5562271499 |
| C  | 257.9465386364 | 195.1201437933 | 397.9840567728 |
| O  | 258.9283387007 | 194.3837444790 | 398.2243935872 |
| N  | 258.0585784303 | 196.5054500582 | 398.1183831360 |
| C  | 257.0418690218 | 197.3643631617 | 397.8352391859 |
| N  | 257.3342397021 | 198.7052912036 | 397.9283733457 |
| N  | 255.8268627584 | 196.9647681518 | 397.5234794026 |
| C  | 255.6542059759 | 195.6164378372 | 397.3747779754 |
| N  | 254.4028288245 | 195.1994192118 | 396.9610807749 |
| C  | 254.0619917117 | 193.8119114002 | 397.1026843576 |
| P  | 262.3723918616 | 187.9623283630 | 394.5341209483 |
| O  | 262.4866027982 | 189.5202211773 | 394.1603978828 |
| O  | 261.0663556532 | 187.5660782360 | 393.6409251890 |
| O  | 263.5597548934 | 187.1221345403 | 394.2782534441 |
| O  | 261.8876569497 | 187.8028815721 | 396.0619236424 |
| C  | 260.5575933160 | 188.1578643823 | 396.5148611786 |
| C  | 260.0602279170 | 187.1754209567 | 397.5732096262 |
| O  | 260.6743240583 | 187.5460127108 | 398.8234139883 |
| C  | 258.5544198911 | 187.2430341803 | 397.7693543202 |
| S  | 257.5362238620 | 187.6973458662 | 396.4246414541 |
| C  | 257.9798318453 | 187.0646235500 | 398.9849218079 |

|   |                |                |                |
|---|----------------|----------------|----------------|
| S | 256.2415428277 | 187.3091320215 | 399.1707729891 |
| C | 258.7541357045 | 186.6480256367 | 400.2140705226 |
| N | 258.3405142378 | 187.4030894184 | 401.3973371032 |
| C | 259.2071255402 | 187.3058582927 | 402.5025428477 |
| C | 258.7456110876 | 187.3507127337 | 403.8474003924 |
| O | 257.5540842654 | 187.3693643763 | 404.2713675332 |
| N | 259.7622468901 | 187.3933611485 | 404.8109556913 |
| C | 261.0907709687 | 187.3083994598 | 404.5199244236 |
| N | 261.9810053925 | 187.3882276583 | 405.5343749998 |
| N | 261.5247973905 | 187.1904580987 | 403.2757546900 |
| C | 260.5882965506 | 187.1997058552 | 402.2964014645 |
| N | 261.0730912209 | 187.0582871481 | 401.0256754348 |
| C | 260.2950467645 | 186.6700524946 | 399.8793722449 |
| P | 263.9359161216 | 190.4303773665 | 394.0207303057 |
| O | 263.5452257880 | 191.7868911089 | 393.5078785162 |
| O | 264.6395837716 | 190.2223417898 | 395.3379270271 |
| O | 264.6834759406 | 189.6053354063 | 392.8329547713 |
| H | 253.7111744344 | 191.3541225195 | 400.9108267390 |
| H | 254.8095675875 | 192.6991631364 | 400.5718471738 |
| H | 257.2684193714 | 192.8210013343 | 397.0536658420 |
| H | 259.0105687001 | 196.8796831057 | 398.1949222267 |
| H | 256.6777944657 | 199.2902556970 | 397.4313095743 |
| H | 258.3151830029 | 198.9384864842 | 397.8040157462 |
| H | 253.6455720835 | 195.8512315243 | 397.1599822385 |
| H | 260.5995870481 | 189.1519210283 | 396.9520941973 |
| H | 259.8659099077 | 188.1590319558 | 395.6743287953 |
| H | 260.3770094609 | 186.1591907376 | 397.2900031473 |
| H | 258.5101757362 | 185.5896592068 | 400.4104641349 |
| H | 258.0396260839 | 188.3705559712 | 401.2329099781 |
| H | 261.6319900931 | 187.1592617128 | 406.4542248135 |
| H | 262.9476255893 | 187.1097681586 | 405.3098903627 |
| H | 262.0779110853 | 187.0990197469 | 400.9077425418 |
| H | 260.5775945684 | 185.6473275969 | 399.5619340879 |
| H | 259.4762623599 | 187.5831711390 | 405.7708248421 |
| H | 260.5511716088 | 188.3373347221 | 393.3631477986 |
| H | 251.3161333501 | 191.1718185055 | 400.6515696301 |
| H | 264.7415522289 | 190.1787726623 | 392.0566070388 |
| H | 251.7824340150 | 193.9252412118 | 404.8480828699 |
| H | 252.3653929961 | 192.0534140144 | 398.8764160915 |
| H | 255.3568497494 | 192.9930395276 | 395.6219157346 |
| H | 253.2236580696 | 193.5791991997 | 396.4397013140 |
| C | 253.8140540000 | 181.3188680000 | 393.8543080000 |
| C | 252.5424124120 | 181.0576445410 | 393.0474978392 |
| C | 251.3389336117 | 181.8415405520 | 393.5500417123 |

|   |                |                |                |
|---|----------------|----------------|----------------|
| C | 251.4727354557 | 183.1357845726 | 394.0785876234 |
| C | 250.0429305121 | 181.3216401308 | 393.4398773021 |
| C | 250.3605026772 | 183.8830501013 | 394.4512374497 |
| C | 248.9166899800 | 182.0675238081 | 393.7927361367 |
| C | 249.0739260583 | 183.3645517087 | 394.2793059322 |
| O | 247.9474187118 | 184.0955003181 | 394.5679169690 |
| H | 252.3034710450 | 179.9851428704 | 393.0378049379 |
| H | 252.7384722369 | 181.3376314685 | 392.0035206443 |
| H | 249.9073178661 | 180.3159606347 | 393.0438822231 |
| H | 252.4503775729 | 183.5926086389 | 394.1927578039 |
| H | 247.9121376914 | 181.6726008793 | 393.6696315322 |
| H | 250.4944384563 | 184.8895174548 | 394.8329230433 |
| H | 248.1575587892 | 185.0334073910 | 394.4455600631 |
| H | 254.0007140496 | 182.3963583371 | 393.9175169236 |
| H | 254.7064280000 | 180.9465740000 | 393.3960950000 |
| H | 253.7446350000 | 180.9720910000 | 394.8641720000 |
| C | 250.7218750000 | 189.7719140000 | 397.2658080000 |
| C | 251.7060240000 | 190.2218780000 | 396.2069210000 |
| O | 251.8647674022 | 191.4565654704 | 396.0221619456 |
| C | 250.5460188405 | 188.2808886773 | 397.6451414216 |
| C | 249.4061914859 | 187.6567412058 | 396.8005847289 |
| C | 250.3113631321 | 188.1667288980 | 399.1609518446 |
| C | 248.9432257081 | 186.2623449126 | 397.2405294965 |
| N | 252.1860570000 | 189.2759060000 | 395.4019000000 |
| C | 253.0112190000 | 189.6169460000 | 394.2560170000 |
| C | 252.3723900000 | 189.5291300000 | 392.8819240000 |
| O | 251.1364736288 | 189.4602674440 | 392.7371449648 |
| N | 253.2205140000 | 189.6571500000 | 391.8670170000 |
| C | 252.7886420000 | 189.7523290000 | 390.4779890000 |
| C | 252.6395510000 | 188.3764130000 | 389.8628300000 |
| O | 253.3252895022 | 188.0314837546 | 388.8953326900 |
| N | 251.7414190000 | 187.5944470000 | 390.4436720000 |
| C | 251.5653020000 | 186.1915040000 | 390.0795090000 |
| C | 251.0844769709 | 185.3944637323 | 391.3114223821 |
| C | 249.8027465121 | 185.9103375739 | 391.8982627581 |
| C | 249.6985161854 | 186.7455341703 | 392.9781705530 |
| C | 248.4559674822 | 185.6481103571 | 391.4540849996 |
| N | 248.3572396375 | 186.9822480476 | 393.2795346224 |
| C | 247.5749203259 | 186.3564358871 | 392.3147960217 |
| C | 247.9150153684 | 184.8689850051 | 390.4198623882 |
| C | 246.1892774918 | 186.3237128998 | 392.1540782938 |
| C | 246.5353364434 | 184.8326046944 | 390.2545948636 |
| C | 245.6815445716 | 185.5573050421 | 391.1089056522 |
| H | 251.4759337792 | 187.7454399032 | 397.4444128643 |



|   |                |                |                |
|---|----------------|----------------|----------------|
| H | 249.4151038965 | 188.7281577556 | 399.4658204374 |
| H | 251.1838032688 | 188.5434875001 | 399.7048176848 |
| H | 250.1967679301 | 187.1286529109 | 399.4795880804 |
| H | 248.5370514659 | 188.3340553494 | 396.8308678527 |
| H | 249.7312741413 | 187.6283002434 | 395.7512074616 |
| H | 248.4315793728 | 186.2988868756 | 398.2075275591 |
| H | 248.2490726054 | 185.8190900116 | 396.5198815443 |
| H | 249.7806994337 | 185.5690652929 | 397.3457631116 |
| H | 251.0115930924 | 190.3326682146 | 398.1641257524 |
| H | 253.3354549581 | 190.6495932755 | 394.3930997585 |
| H | 253.9188480174 | 189.0240772534 | 394.2756317262 |
| H | 252.1221543900 | 188.2938305170 | 395.6431809930 |
| H | 251.8376716284 | 190.2983876909 | 390.4450411176 |
| H | 254.2394117205 | 189.5541720204 | 391.9926937122 |
| H | 251.8649469015 | 185.4417590176 | 392.0761495353 |
| H | 250.9741500026 | 184.3386739351 | 391.0327194795 |
| H | 250.4845647644 | 187.1919254754 | 393.5674400872 |
| H | 248.0528630088 | 187.7523945466 | 393.8560512462 |
| H | 248.5713670272 | 184.3052041033 | 389.7617154557 |
| H | 246.1040543346 | 184.2348532813 | 389.4549652785 |
| H | 245.5311319018 | 186.8716505627 | 392.8241032816 |
| H | 244.6061089670 | 185.5124567244 | 390.9540582380 |
| H | 252.5552566875 | 185.8203466156 | 389.7857053953 |
| H | 251.1773275943 | 187.9753479905 | 391.1990472680 |
| H | 253.5564373237 | 190.2844404743 | 389.9150804583 |
| H | 250.9372440000 | 186.0082860000 | 389.2328240000 |
| H | 249.7487980000 | 190.1330640000 | 397.0058230000 |
| C | 257.4170180000 | 180.5496190000 | 392.8123970000 |
| C | 257.7628094452 | 181.6672773861 | 391.7997673811 |
| C | 256.5074448815 | 182.1954233043 | 391.1407585830 |
| C | 255.7774013907 | 183.2297984612 | 391.7420016421 |
| C | 255.9907704689 | 181.5985199563 | 389.9838838551 |
| C | 254.5564574836 | 183.6458321301 | 391.2110266745 |
| C | 254.7731972564 | 182.0153677801 | 389.4445833459 |
| C | 254.0503173791 | 183.0394145325 | 390.0602365798 |
| H | 258.2675074382 | 182.4818451182 | 392.3304760957 |
| H | 258.4661751118 | 181.2919911677 | 391.0452003816 |
| H | 256.5484713584 | 180.7943473600 | 389.5057116424 |
| H | 256.1596191575 | 183.7138368584 | 392.6381762014 |
| H | 254.3894928103 | 181.5423665173 | 388.5428724882 |
| H | 254.0176868870 | 184.4552737654 | 391.6902725574 |
| H | 253.1013278270 | 183.3693268114 | 389.6436638737 |
| H | 258.2767548847 | 180.3597678855 | 393.4694967270 |
| H | 256.6113710000 | 180.8878910000 | 393.4299720000 |

|   |                 |                |                |
|---|-----------------|----------------|----------------|
| H | 257.1875720000  | 179.6226060000 | 392.3297990000 |
| C | 256.5883240000  | 185.6261280000 | 388.1369230000 |
| C | 256.7150441016  | 186.8781894657 | 389.0344266897 |
| C | 256.7739600512  | 186.4758381201 | 390.5141779354 |
| C | 257.9402440563  | 187.7231694488 | 388.6565171513 |
| H | 255.8170034929  | 187.4942084314 | 388.8906311104 |
| H | 257.9856753914  | 188.6324541365 | 389.2687876519 |
| H | 258.8724677524  | 187.1626615521 | 388.8156999398 |
| H | 257.9141542491  | 188.0316893748 | 387.6029009348 |
| H | 256.8331514121  | 187.3512742411 | 391.1641735067 |
| H | 257.6468047271  | 185.8352646996 | 390.7128992668 |
| H | 255.8836646678  | 185.9178838417 | 390.8080687929 |
| H | 255.6131032025  | 185.1558056310 | 388.3268276118 |
| H | 256.5961940000  | 185.9045290000 | 387.1038060000 |
| H | 257.3115520000  | 184.8931960000 | 388.4278720000 |
| C | 257.8298250000  | 191.8647110000 | 391.3055300000 |
| C | 258.2056898435  | 190.5219613039 | 391.9209715823 |
| C | 256.97444461522 | 189.7227254042 | 392.3232596777 |
| O | 255.9863920215  | 189.6614135549 | 391.5698072774 |
| N | 257.0856984730  | 189.0546302889 | 393.4824884345 |
| H | 258.8681614614  | 190.6495046394 | 392.7784785490 |
| H | 258.7394707232  | 189.9099984251 | 391.1799117355 |
| H | 257.6813349518  | 189.4525706484 | 394.2156853146 |
| H | 256.3069940743  | 188.4742503872 | 393.7804448445 |
| H | 257.1023133572  | 191.6838495238 | 390.5046649086 |
| H | 258.6811120000  | 192.3354150000 | 390.8598300000 |
| H | 257.3481020000  | 192.5081980000 | 392.0117640000 |
| C | 257.2030720000  | 182.8222950000 | 398.2411400000 |
| C | 256.2069930000  | 182.9722980000 | 399.3890710000 |
| O | 256.2821880969  | 183.9310983480 | 400.1593148203 |
| C | 257.0121449558  | 183.9124656563 | 397.1740408152 |
| C | 258.1361980062  | 183.9957519440 | 396.1546953470 |
| C | 259.4271600473  | 183.5033030620 | 396.3832371232 |
| C | 257.9149062484  | 184.7092552728 | 394.9656824963 |
| C | 260.4733067564  | 183.7475588333 | 395.4904614418 |
| C | 258.9480984739  | 184.9631823908 | 394.0672290620 |
| C | 260.2443023799  | 184.4995331501 | 394.3375495432 |
| O | 261.3007005584  | 184.7373536587 | 393.5057107770 |
| N | 255.2919070000  | 182.0103590000 | 399.5379370000 |
| C | 254.2768300000  | 182.0753700000 | 400.5798610000 |
| C | 253.0549250000  | 182.8554920000 | 400.1428150000 |
| O | 252.1626554079  | 183.0770732633 | 400.9620650072 |
| N | 253.0010500000  | 183.1645790000 | 398.8588310000 |
| C | 251.9221530000  | 184.0206930000 | 398.3808010000 |

|   |                |                |                |
|---|----------------|----------------|----------------|
| C | 252.4690510843 | 184.9551932170 | 397.3158661587 |
| C | 253.1652005595 | 186.1580308795 | 397.9195866794 |
| O | 252.9784236756 | 186.5514125698 | 399.0551766914 |
| O | 253.9105186918 | 186.7529389882 | 397.0110055056 |
| H | 256.9261884233 | 184.8805065278 | 397.6812452386 |
| H | 256.0562298927 | 183.7654921842 | 396.6524201720 |
| H | 256.9226559193 | 185.0983053039 | 394.7614081072 |
| H | 259.6488861907 | 182.9369240850 | 397.2842255002 |
| H | 258.7581240869 | 185.5441624835 | 393.1675112027 |
| H | 261.4810059975 | 183.3925908403 | 395.6875279591 |
| H | 261.1822776361 | 185.6094593536 | 393.0994105921 |
| H | 258.1835350660 | 182.9407539079 | 398.7142479583 |
| H | 254.6936692153 | 182.5880083668 | 401.4502536395 |
| H | 253.9685536092 | 181.0663945527 | 400.8692701899 |
| H | 255.2883860402 | 181.2282713403 | 398.8994160968 |
| H | 251.6701155053 | 185.3460001085 | 396.6789503753 |
| H | 253.1454769157 | 184.4511102409 | 396.6160199490 |
| H | 251.5605837337 | 184.5982494683 | 399.2355889690 |
| H | 253.8154388789 | 183.0472869385 | 398.2771758423 |
| H | 257.1736930000 | 181.8504670000 | 397.7943870000 |
| H | 251.0845350000 | 183.5184970000 | 397.9436560000 |
| C | 252.3745140000 | 194.4248920000 | 391.2271740000 |
| C | 251.5054576524 | 193.9016189296 | 392.3663140471 |
| O | 251.1949533191 | 194.9394889828 | 393.3314670345 |
| C | 252.1720238235 | 192.7081118011 | 393.0340499573 |
| H | 250.5218925224 | 193.6187942078 | 391.9701502368 |
| H | 251.5147935744 | 192.1480493673 | 393.6955505262 |
| H | 253.0341806859 | 193.0417781281 | 393.6284040979 |
| H | 252.5560118656 | 192.0160182993 | 392.2822842403 |
| H | 252.0005523615 | 195.0995934398 | 393.8446583110 |
| H | 252.2602702656 | 193.7357900801 | 390.3777436386 |
| H | 253.4131320000 | 194.3659120000 | 391.4775630000 |
| H | 252.0456620000 | 195.3824430000 | 390.8809740000 |
| C | 252.9229320000 | 197.6776770000 | 399.7280460000 |
| C | 251.9289630000 | 197.6087100000 | 398.5540210000 |
| O | 251.9969122022 | 196.6793022701 | 397.7246720956 |
| C | 252.8008925816 | 196.4051958950 | 400.5783523569 |
| O | 251.4358025034 | 196.3768834471 | 401.0032982454 |
| C | 253.7707965449 | 196.4222725131 | 401.7603637712 |
| N | 251.0510080000 | 198.6037450000 | 398.4339890000 |
| C | 250.2740630000 | 198.7447630000 | 397.1999590000 |
| C | 248.8842772386 | 198.0698632690 | 397.2984949971 |
| C | 248.3553800746 | 197.4133264003 | 396.0059014887 |
| C | 249.2768815575 | 196.3491408932 | 395.3546577164 |

|   |                |                |                |
|---|----------------|----------------|----------------|
| N | 249.9782129752 | 195.5463860278 | 396.3536604170 |
| C | 250.1969855416 | 194.2289682845 | 396.3440979174 |
| N | 249.7322246043 | 193.4380152880 | 395.3455393383 |
| N | 250.8528353434 | 193.6575244655 | 397.3628916649 |
| H | 253.0263706422 | 195.5408070455 | 399.9410620734 |
| H | 253.7056787769 | 195.4957655643 | 402.3390496479 |
| H | 253.5448616573 | 197.2639923201 | 402.4274439081 |
| H | 254.8061243976 | 196.5223108319 | 401.4118102022 |
| H | 251.2832863566 | 195.5463795596 | 401.4873044898 |
| H | 253.9186691456 | 197.7092455343 | 399.2640376454 |
| H | 248.9541417155 | 197.2974831101 | 398.0722144231 |
| H | 248.1400323485 | 198.7893298378 | 397.6602186742 |
| H | 247.3951400966 | 196.9453531522 | 396.2535390986 |
| H | 248.1440098232 | 198.1741104939 | 395.2427530260 |
| H | 250.0165579290 | 196.8159809595 | 394.6932479626 |
| H | 248.6733553148 | 195.6964939637 | 394.7201068480 |
| H | 250.6297899879 | 196.0633917770 | 396.9610560444 |
| H | 250.1156085929 | 192.4943112462 | 395.3869702925 |
| H | 249.8563183340 | 193.8715716718 | 394.4323559207 |
| H | 251.3137118229 | 194.2356423939 | 398.0574864242 |
| H | 251.2789445872 | 192.7431680042 | 397.1425294622 |
| H | 250.8704411129 | 198.2624109382 | 396.4196596952 |
| H | 251.0069655183 | 199.3081700417 | 399.1544609303 |
| H | 252.8224950000 | 198.5271910000 | 400.3708040000 |
| H | 250.2455750000 | 199.7824050000 | 396.9403670000 |
| C | 262.4397860000 | 198.8487360000 | 397.8030600000 |
| C | 261.3738350000 | 197.9836670000 | 397.1570730000 |
| O | 260.2203825551 | 197.9864287608 | 397.6259956583 |
| N | 261.7388800000 | 197.3096500000 | 396.0761030000 |
| C | 260.9409370000 | 196.2035970000 | 395.5761320000 |
| C | 261.7589980000 | 194.9406520000 | 395.8171980000 |
| O | 262.7446335192 | 194.7418188798 | 395.0956285957 |
| C | 260.5505033947 | 196.3398261664 | 394.0917305053 |
| C | 259.7468340232 | 195.1027098629 | 393.6584403627 |
| C | 259.7613511935 | 197.6341153925 | 393.8553936995 |
| N | 261.4030230000 | 194.1806740000 | 396.8512230000 |
| C | 262.2440980000 | 193.0757420000 | 397.2942690000 |
| C | 263.7130720000 | 193.5308170000 | 397.3752510000 |
| O | 263.9553574105 | 194.5963664466 | 397.9594471367 |
| C | 262.0623989095 | 191.8455108198 | 396.4121299705 |
| C | 260.6466636498 | 191.4701872538 | 396.2566215812 |
| N | 259.7759008811 | 191.2840382625 | 397.3085898823 |
| C | 259.9324084272 | 191.1774053383 | 395.1237955135 |
| C | 258.5965426080 | 190.8660375258 | 396.7754037699 |

|   |                |                |                |
|---|----------------|----------------|----------------|
| N | 258.6538123363 | 190.7922049039 | 395.4513359352 |
| N | 264.6520740000 | 192.7718210000 | 396.8362480000 |
| C | 266.0420760000 | 193.1748200000 | 397.0131920000 |
| C | 266.3610680000 | 194.3288050000 | 396.0731710000 |
| O | 267.3187262965 | 195.0748538669 | 396.3162340437 |
| C | 267.0286565507 | 191.9997130892 | 396.8647518721 |
| O | 267.0948696216 | 191.4469241431 | 395.5691167134 |
| N | 265.6370370000 | 194.4208050000 | 394.9661900000 |
| C | 265.9150260000 | 195.4717900000 | 393.9891710000 |
| C | 265.0112514548 | 195.2493560297 | 392.7560083816 |
| O | 265.1415108322 | 193.9468704180 | 392.2077275271 |
| C | 265.3587365507 | 196.2377538424 | 391.6456671746 |
| H | 263.0003318626 | 199.4225772693 | 397.0559898552 |
| H | 261.4823917904 | 196.3662103007 | 393.5119322918 |
| H | 258.8261961470 | 195.0041758318 | 394.2495383205 |
| H | 259.4585379675 | 195.1775007936 | 392.6042286812 |
| H | 260.3246303152 | 194.1820163893 | 393.7813885555 |
| H | 260.3329846791 | 198.5166814835 | 394.1643733300 |
| H | 258.8218551244 | 197.6284756803 | 394.4245637453 |
| H | 259.5092055095 | 197.7479551523 | 392.7950236008 |
| H | 260.0228034125 | 196.1876903549 | 396.1682686251 |
| H | 262.7286376815 | 197.2479105246 | 395.8565308562 |
| H | 262.6364588559 | 191.0060898396 | 396.8248354630 |
| H | 262.4532818778 | 192.0729477041 | 395.4195951794 |
| H | 260.3046159101 | 191.2162512836 | 394.1099144855 |
| H | 257.7499812967 | 190.5799229760 | 397.3714586346 |
| H | 261.9413864718 | 192.8506374844 | 398.3224693536 |
| H | 260.5494037791 | 194.3769792442 | 397.3758365393 |
| H | 266.7720487193 | 191.2438312211 | 397.6233520811 |
| H | 268.0203934414 | 192.4066975418 | 397.0970819156 |
| H | 266.3091397933 | 190.8791747029 | 395.4482394034 |
| H | 266.1541182638 | 193.5823053773 | 398.0228457377 |
| H | 264.4681174013 | 191.8763476298 | 396.3852393476 |
| H | 263.9734604211 | 195.4195631467 | 393.0840747707 |
| H | 265.3013228869 | 197.2744915185 | 391.9992157244 |
| H | 264.6717948952 | 196.1147857515 | 390.8022814561 |
| H | 266.3764516584 | 196.0483810020 | 391.2851719500 |
| H | 264.6205969444 | 193.3105726077 | 392.7310949267 |
| H | 266.9779338776 | 195.4484553327 | 393.7264095463 |
| H | 264.7782275118 | 193.8924243156 | 394.8843791019 |
| H | 259.9861439274 | 191.4208944874 | 398.3141653773 |
| H | 262.0015610000 | 199.5148990000 | 398.5165630000 |
| H | 263.1590353992 | 198.1978568205 | 398.3169184155 |
| H | 265.6769230000 | 196.4271170000 | 394.4081680000 |

|   |                |                |                |
|---|----------------|----------------|----------------|
| C | 259.4897310000 | 190.5143660000 | 408.0813510000 |
| C | 258.6587620000 | 191.0442650000 | 406.9172830000 |
| O | 258.5406951912 | 190.3903731806 | 405.8721881059 |
| C | 260.4829444746 | 189.4262441614 | 407.6504961945 |
| O | 259.8945277970 | 188.1155302521 | 407.5878560373 |
| N | 258.0657450000 | 192.2112760000 | 407.1151720000 |
| C | 257.1357700000 | 192.7791890000 | 406.1320980000 |
| C | 257.8807970000 | 193.5141070000 | 405.0200630000 |
| O | 259.1076137822 | 193.6938400042 | 405.1076119211 |
| C | 256.2723573404 | 193.7279421140 | 406.9864120040 |
| C | 257.3013601733 | 194.2893686485 | 407.9830107692 |
| C | 258.2007263094 | 193.0766364452 | 408.3012140050 |
| N | 257.1568240000 | 193.9310180000 | 403.9930070000 |
| C | 257.7578510000 | 194.5809260000 | 402.8279760000 |
| C | 257.0864514262 | 194.0991343951 | 401.5356667670 |
| C | 257.2154710173 | 192.6125856994 | 401.3017532254 |
| N | 256.9960690920 | 192.0851816216 | 400.0389223615 |
| C | 257.4874911919 | 191.5128367127 | 402.0939272419 |
| C | 257.1375950805 | 190.7354266754 | 400.1184358296 |
| N | 257.4384892039 | 190.3528697212 | 401.3453211062 |
| H | 261.3386889588 | 189.4099114447 | 408.3411863144 |
| H | 260.8602876874 | 189.6172642742 | 406.6445271373 |
| H | 259.5750700633 | 187.8726591827 | 408.4654424876 |
| H | 260.0615641785 | 191.3314720364 | 408.5378019429 |
| H | 255.4951918045 | 193.1483222503 | 407.4978324501 |
| H | 255.7781523566 | 194.4890929616 | 406.3782294466 |
| H | 256.8519673491 | 194.7153341714 | 408.8851913050 |
| H | 257.8998368891 | 195.0672548873 | 407.4970102920 |
| H | 257.8601888174 | 192.5466883574 | 409.2016010715 |
| H | 259.2441245586 | 193.3749235244 | 408.4523087253 |
| H | 256.5357473298 | 191.9764471069 | 405.6930680131 |
| H | 256.0253481582 | 194.3927886218 | 401.5495983483 |
| H | 257.5431892544 | 194.6327614934 | 400.6919278116 |
| H | 257.7369429693 | 191.4778512749 | 403.1444390302 |
| H | 256.9752936313 | 190.0722607608 | 399.2824145746 |
| H | 258.8076397441 | 194.2901377569 | 402.8129003199 |
| H | 256.1508132540 | 193.7317852682 | 403.9608780580 |
| H | 256.7685315813 | 192.5947839282 | 399.1729502880 |
| H | 257.7515080000 | 195.6461040000 | 402.9292550000 |
| H | 258.8823310000 | 190.1066000000 | 408.8621790000 |
| C | 262.5168400000 | 191.6281260000 | 404.4244280000 |
| C | 261.4201509413 | 190.7936664071 | 403.7028710366 |
| C | 261.0506163995 | 191.3313418244 | 402.3506719621 |
| N | 260.6905767010 | 192.6547063414 | 402.1579937114 |

|   |                |                |                |
|---|----------------|----------------|----------------|
| C | 260.9522253494 | 190.7605177361 | 401.1028001488 |
| C | 260.3709366695 | 192.8233330016 | 400.8410541042 |
| N | 260.5297145845 | 191.6957477065 | 400.1720614814 |
| H | 260.5199433286 | 190.7311266527 | 404.3315841667 |
| H | 261.7793597466 | 189.7702613271 | 403.5585723281 |
| H | 261.1105332082 | 189.7265071999 | 400.8279388157 |
| H | 260.0367504874 | 193.7568467788 | 400.4089178205 |
| H | 262.8558902266 | 191.0799442721 | 405.3136033504 |
| H | 260.5566231764 | 193.3161603087 | 402.9128573992 |
| H | 262.1234480000 | 192.5625320000 | 404.7665220000 |
| H | 263.3515270000 | 191.7182260000 | 403.7610420000 |
| C | 247.8968980000 | 194.0107940000 | 404.4931570000 |
| C | 248.2018860000 | 195.4878030000 | 404.7371180000 |
| O | 247.4392671576 | 196.1674477404 | 405.4302715158 |
| C | 246.8110551461 | 193.8121132878 | 403.4317410939 |
| O | 247.2376320367 | 194.2721112368 | 402.1553715058 |
| N | 249.3138700000 | 195.9618030000 | 404.1770870000 |
| C | 249.8018600000 | 197.3148150000 | 404.4650490000 |
| H | 245.9229902815 | 194.3985705716 | 403.6917163639 |
| H | 246.5210276049 | 192.7479458378 | 403.4017740874 |
| H | 248.1122140685 | 193.8939690096 | 401.9829295084 |
| H | 248.8024453066 | 193.4946303106 | 404.1336649049 |
| H | 249.0916164567 | 197.7709458974 | 405.1562330287 |
| H | 249.8643105596 | 195.3649926049 | 403.5703763621 |
| H | 250.7882180108 | 197.2675537056 | 404.9429456145 |
| H | 249.8830000000 | 197.9214530000 | 403.5873780000 |
| H | 247.6468730000 | 193.5209220000 | 405.4109870000 |
| C | 248.0799800000 | 189.8886070000 | 402.3844170000 |
| C | 249.0950770000 | 189.0787130000 | 403.1734010000 |
| O | 248.7625889751 | 188.1261682305 | 403.8784487311 |
| N | 250.3660440000 | 189.4517880000 | 403.0173110000 |
| C | 251.5131280000 | 188.7688930000 | 403.5982810000 |
| C | 251.3882420000 | 188.5089510000 | 405.0893020000 |
| O | 251.8643037023 | 187.5043697476 | 405.6380918017 |
| N | 250.8692160000 | 189.5059460000 | 405.7982900000 |
| C | 250.6663130000 | 189.3999970000 | 407.2253080000 |
| H | 248.3899608104 | 190.9347020409 | 402.2625751537 |
| H | 248.0291863568 | 189.4693477240 | 401.3704928772 |
| H | 252.3947158694 | 189.3978306554 | 403.4464156978 |
| H | 251.6978245727 | 187.8146242489 | 403.1063338955 |
| H | 250.5513975920 | 190.2825941632 | 402.4785549947 |
| H | 251.6174581966 | 189.3224183734 | 407.7650115262 |
| H | 250.1701882348 | 190.3105881769 | 407.5737624834 |
| H | 250.5301263594 | 190.3224713740 | 405.3113969549 |

|   |                |                |                |
|---|----------------|----------------|----------------|
| H | 247.0858900000 | 189.8760150000 | 402.7800520000 |
| H | 250.0645750000 | 188.5600940000 | 407.5034690000 |
| C | 252.9378530000 | 183.9059790000 | 405.2635470000 |
| C | 253.9995486879 | 185.0058777937 | 405.0994378062 |
| C | 253.9636636549 | 185.6823421686 | 403.7660610408 |
| N | 254.9277711036 | 186.5883250207 | 403.3478686273 |
| C | 252.9665426879 | 185.7687627319 | 402.8234734830 |
| C | 254.4650692333 | 187.1672249756 | 402.1978653228 |
| N | 253.2777698556 | 186.7068779158 | 401.8637080519 |
| H | 253.8373117343 | 185.7769420835 | 405.8579292750 |
| H | 255.0007480883 | 184.5828731592 | 405.2855331570 |
| H | 252.0414030358 | 185.2111560812 | 402.7827749084 |
| H | 255.0507649587 | 187.8852705960 | 401.6416300869 |
| H | 253.0331810313 | 183.1995697108 | 404.4257883859 |
| H | 255.8784082783 | 186.7203955439 | 403.6923363936 |
| H | 253.0726070000 | 183.3277390000 | 406.1537030000 |
| H | 251.9386620000 | 184.2827480000 | 405.1959970000 |
| C | 256.1358660000 | 184.2685110000 | 410.0932670000 |
| C | 254.8571621363 | 185.0209344471 | 409.6706484347 |
| C | 254.9167586773 | 185.6305892722 | 408.2492866664 |
| C | 255.8167733025 | 186.8742988567 | 408.0875492678 |
| N | 255.9056880651 | 187.4162640498 | 406.7206628175 |
| C | 255.2494547991 | 188.5118284002 | 406.2802128126 |
| N | 254.0996253527 | 188.9042700038 | 406.9003944060 |
| N | 255.7413625249 | 189.2221731201 | 405.2777015871 |
| H | 254.6221921378 | 185.8060283182 | 410.4043567219 |
| H | 254.0071888679 | 184.3270223313 | 409.6900374884 |
| H | 253.9007533841 | 185.9050393479 | 407.9453755561 |
| H | 255.2473804431 | 184.8593426378 | 407.5445166791 |
| H | 255.4554269073 | 187.6766145486 | 408.7413898923 |
| H | 256.8441219367 | 186.6382739817 | 408.3945767310 |
| H | 256.6795243124 | 187.1326308932 | 406.1167788140 |
| H | 253.3909255651 | 188.1689414305 | 406.9349532219 |
| H | 253.7150520494 | 189.7560275553 | 406.4854808294 |
| H | 255.1538702510 | 189.9494746820 | 404.8688770800 |
| H | 256.6272164213 | 188.9489709998 | 404.8495835612 |
| H | 256.9582533735 | 184.9972048431 | 410.1881854735 |
| H | 256.0755190000 | 183.8111360000 | 411.0587020000 |
| H | 256.4554930000 | 183.6147070000 | 409.3088700000 |
| C | 258.2849300000 | 182.3635890000 | 407.6132630000 |
| C | 259.1217889788 | 183.2904727140 | 406.6981256099 |
| C | 259.3499163488 | 182.7090374103 | 405.2893218563 |
| C | 259.9006494372 | 183.7988565329 | 404.3720755068 |
| O | 260.9337191655 | 184.3997072311 | 404.6570853267 |



|   |                |                |                |
|---|----------------|----------------|----------------|
| N | 259.1654314017 | 184.0705193153 | 403.2578217655 |
| H | 258.5750341339 | 184.2387420271 | 406.5853832593 |
| H | 260.0917932905 | 183.5514803439 | 407.1351085784 |
| H | 260.0777707695 | 181.8891565204 | 405.3292531365 |
| H | 258.4130010232 | 182.2944385914 | 404.8938944727 |
| H | 258.2387247861 | 183.6976841745 | 403.1121667317 |
| H | 259.3928387018 | 184.9117962962 | 402.7411125713 |
| H | 258.8566984944 | 181.4959574940 | 407.9618037769 |
| H | 257.9773220000 | 182.9532090000 | 408.4514900000 |
| H | 257.4950910000 | 182.0183080000 | 406.9793570000 |
| C | 266.7507380000 | 184.8294110000 | 405.9897060000 |
| C | 266.9140867077 | 184.5525328686 | 404.4814378303 |
| C | 266.4498880323 | 185.7240498689 | 403.5859981532 |
| C | 265.0000585622 | 186.1274944022 | 403.8338663203 |
| O | 264.6656712991 | 186.6214137807 | 404.9231448925 |
| N | 264.1211458518 | 185.9029493167 | 402.8381772729 |
| H | 266.3732299625 | 183.6400123655 | 404.1970953249 |
| H | 267.9714340987 | 184.3679103022 | 404.2497155186 |
| H | 267.0576085331 | 186.6091559996 | 403.8099017675 |
| H | 266.6134007850 | 185.4761397027 | 402.5302620223 |
| H | 263.1594947319 | 186.2499074775 | 402.9565109474 |
| H | 264.4319316469 | 185.5769867301 | 401.9356858638 |
| H | 265.7109394100 | 184.6899706764 | 406.2974305537 |
| H | 267.3703190000 | 184.1798560000 | 406.5720270000 |
| H | 266.9701810000 | 185.8609910000 | 406.1702230000 |
| C | 265.3832440000 | 185.7487040000 | 399.2267180000 |
| C | 264.4405810393 | 186.2102651526 | 398.0950545712 |
| C | 264.8540629925 | 187.5966941375 | 397.5507517650 |
| C | 264.6471831620 | 188.7528249946 | 398.5274105469 |
| O | 265.5545383027 | 189.4911761985 | 398.8981491893 |
| N | 263.3650798650 | 188.8968124490 | 398.9999506133 |
| H | 263.3955538533 | 186.2332512117 | 398.4322444985 |
| H | 264.4750662948 | 185.4943976546 | 397.2648627044 |
| H | 265.9167019813 | 187.6014949583 | 397.2882571856 |
| H | 264.3026404208 | 187.8170565862 | 396.6353619670 |
| H | 263.1688273041 | 189.7316094717 | 399.5363524471 |
| H | 262.5746489109 | 188.4126910658 | 398.5920669183 |
| H | 265.3435984682 | 186.4734504075 | 400.0543466807 |
| H | 266.3826300000 | 185.7928110000 | 398.8470050000 |
| H | 265.1504780000 | 184.7840630000 | 399.6269520000 |
| C | 264.6901830000 | 186.5738150000 | 390.9080180000 |
| C | 266.0211440000 | 186.4578400000 | 391.6570910000 |
| O | 266.9669562207 | 185.8591136006 | 391.1234004800 |
| N | 266.1040810000 | 187.0408770000 | 392.8470770000 |

|    |                |                |                |
|----|----------------|----------------|----------------|
| C  | 267.3460400000 | 187.0189030000 | 393.6281430000 |
| H  | 264.0513272713 | 187.3744428292 | 391.2915925595 |
| H  | 264.1458197043 | 185.6266789106 | 390.9894760682 |
| H  | 268.1859580965 | 186.8795538599 | 392.9460723429 |
| H  | 265.2703857139 | 187.4197715910 | 393.2819259980 |
| H  | 267.4444875410 | 187.9553812594 | 394.1846273143 |
| H  | 264.9293500000 | 186.7388150000 | 389.8782240000 |
| H  | 267.2858450000 | 186.1920680000 | 394.3046200000 |
| O  | 254.3385773890 | 186.5680584150 | 392.6936827910 |
| O  | 255.0452693805 | 187.4047971085 | 394.8535690196 |
| O  | 254.5314812646 | 184.9822792638 | 394.5604283216 |
| Cl | 254.1352403319 | 186.3589946354 | 394.1509619445 |
| O  | 252.6895256899 | 186.6053122664 | 394.4866284359 |

## The TS for the O-Cl cleavage of perchlorate optimized using the bigger model

|    |                |                |                |
|----|----------------|----------------|----------------|
| Mo | 255.3478180000 | 188.1085230000 | 397.0566890000 |
| P  | 253.2903890000 | 192.3660170000 | 404.4419010000 |
| O  | 254.2120130000 | 193.4495160000 | 403.9666630000 |
| O  | 253.7618410000 | 191.1078910000 | 405.1049060000 |
| O  | 252.4052990000 | 191.8092890000 | 403.0571620000 |
| O  | 252.9087250000 | 193.2694720000 | 401.0167550000 |
| P  | 251.7555330000 | 192.7723780000 | 401.9755810000 |
| O  | 250.9408050000 | 193.9062540000 | 402.5102170000 |
| O  | 250.8269950000 | 191.7645780000 | 401.1088980000 |
| O  | 252.0319190000 | 192.9516950000 | 405.2959060000 |
| C  | 253.8040650000 | 192.2956970000 | 400.3840350000 |
| C  | 253.4511690000 | 192.2332390000 | 398.9066420000 |
| O  | 253.6498900000 | 193.5759820000 | 398.4385430000 |
| C  | 254.1858690000 | 191.1603390000 | 398.1380650000 |
| S  | 253.9775690000 | 189.4820620000 | 398.6203850000 |
| C  | 254.8981010000 | 191.4691780000 | 397.0356940000 |
| S  | 255.6011970000 | 190.2413210000 | 396.0296290000 |
| C  | 255.2118730000 | 192.8943640000 | 396.6805450000 |
| N  | 256.4256570000 | 193.3017630000 | 397.4086840000 |
| C  | 256.6320960000 | 194.6920940000 | 397.5153740000 |
| C  | 257.9053810000 | 195.1407120000 | 397.9466090000 |
| O  | 258.8849990000 | 194.4087680000 | 398.2054750000 |
| N  | 258.0100400000 | 196.5267830000 | 398.0600420000 |
| C  | 256.9771360000 | 197.3724670000 | 397.8026780000 |
| N  | 257.2479940000 | 198.7150380000 | 397.9283990000 |

|   |                |                |                |
|---|----------------|----------------|----------------|
| N | 255.7659540000 | 196.9611860000 | 397.4918270000 |
| C | 255.6089610000 | 195.6106390000 | 397.3360100000 |
| N | 254.3611230000 | 195.1796870000 | 396.9292320000 |
| C | 254.0380090000 | 193.7886810000 | 397.0723470000 |
| P | 262.3565150000 | 187.9957340000 | 394.4950880000 |
| O | 262.4791600000 | 189.5551650000 | 394.1304530000 |
| O | 261.0499120000 | 187.6026190000 | 393.6021310000 |
| O | 263.5326410000 | 187.1433260000 | 394.2350770000 |
| O | 261.8823980000 | 187.8389460000 | 396.0246500000 |
| C | 260.5545260000 | 188.1878320000 | 396.4787020000 |
| C | 260.0595190000 | 187.2000520000 | 397.5275900000 |
| O | 260.6752350000 | 187.5658640000 | 398.7746710000 |
| C | 258.5562580000 | 187.2661270000 | 397.7226110000 |
| S | 257.5541410000 | 187.6635040000 | 396.3576200000 |
| C | 257.9810840000 | 187.0926960000 | 398.9389130000 |
| S | 256.2435410000 | 187.3048860000 | 399.1127010000 |
| C | 258.7635600000 | 186.6706610000 | 400.1657460000 |
| N | 258.3652350000 | 187.4177000000 | 401.3574250000 |
| C | 259.2465280000 | 187.3274560000 | 402.4511090000 |
| C | 258.8020190000 | 187.3791490000 | 403.8008670000 |
| O | 257.6169810000 | 187.3935060000 | 404.2377070000 |
| N | 259.8260420000 | 187.4358090000 | 404.7508430000 |
| C | 261.1498990000 | 187.3392690000 | 404.4529190000 |
| N | 262.0422590000 | 187.4366570000 | 405.4656960000 |
| N | 261.5723820000 | 187.2078110000 | 403.2061330000 |
| C | 260.6259270000 | 187.2135190000 | 402.2334580000 |
| N | 261.0966260000 | 187.0603550000 | 400.9609360000 |
| C | 260.3001880000 | 186.6847670000 | 399.8248270000 |
| P | 263.9388340000 | 190.4503650000 | 394.0018050000 |
| O | 263.5469620000 | 191.8128410000 | 393.5072320000 |
| O | 264.6474950000 | 190.2212630000 | 395.3129540000 |
| O | 264.6855730000 | 189.6333510000 | 392.8079470000 |
| H | 253.7276090000 | 191.3161490000 | 400.8641350000 |
| H | 254.8083280000 | 192.6733180000 | 400.5300140000 |
| H | 257.2514390000 | 192.8333040000 | 397.0350300000 |
| H | 258.9586410000 | 196.9098690000 | 398.1406740000 |
| H | 256.5837040000 | 199.3047330000 | 397.4492960000 |
| H | 258.2232090000 | 198.9724200000 | 397.8184340000 |
| H | 253.5998860000 | 195.8234050000 | 397.1348770000 |
| H | 260.5916640000 | 189.1775360000 | 396.9222960000 |
| H | 259.8633000000 | 188.1959850000 | 395.6399800000 |
| H | 260.3757270000 | 186.1846770000 | 397.2376040000 |
| H | 258.5143140000 | 185.6130730000 | 400.3556750000 |
| H | 258.0376240000 | 188.3771210000 | 401.2074730000 |

|   |                |                |                |
|---|----------------|----------------|----------------|
| H | 261.6950440000 | 187.2023150000 | 406.3845850000 |
| H | 263.0100800000 | 187.1606190000 | 405.2459040000 |
| H | 262.0977240000 | 187.1197830000 | 400.8210750000 |
| H | 260.5705370000 | 185.6627530000 | 399.4973920000 |
| H | 259.5414920000 | 187.6248440000 | 405.7107320000 |
| H | 260.5077090000 | 188.3669190000 | 393.3582620000 |
| H | 251.3182230000 | 191.1050000000 | 400.5894730000 |
| H | 264.7153710000 | 190.1991000000 | 392.0244600000 |
| H | 251.6619650000 | 193.7287920000 | 404.8468560000 |
| H | 252.3723350000 | 192.0053210000 | 398.8391100000 |
| H | 255.3493450000 | 192.9976850000 | 395.5941030000 |
| H | 253.2025420000 | 193.5435260000 | 396.4095090000 |
| C | 253.8140540000 | 181.3188680000 | 393.8543080000 |
| C | 252.5440520000 | 181.0680770000 | 393.0421690000 |
| C | 251.3425630000 | 181.8617470000 | 393.5289450000 |
| C | 251.4764120000 | 183.1693300000 | 394.0205270000 |
| C | 250.0459440000 | 181.3367910000 | 393.4416750000 |
| C | 250.3658660000 | 183.9248480000 | 394.3846160000 |
| C | 248.9219600000 | 182.0889830000 | 393.7866490000 |
| C | 249.0780420000 | 183.4003250000 | 394.2416830000 |
| O | 247.9514020000 | 184.1275510000 | 394.5290360000 |
| H | 252.2956330000 | 179.9988120000 | 393.0334550000 |
| H | 252.7497480000 | 181.3428590000 | 391.9987800000 |
| H | 249.9081020000 | 180.3216290000 | 393.0741000000 |
| H | 252.4530740000 | 183.6297780000 | 394.1177610000 |
| H | 247.9188470000 | 181.6863530000 | 393.6863770000 |
| H | 250.5075080000 | 184.9405410000 | 394.7344860000 |
| H | 248.1662660000 | 185.0683580000 | 394.4494380000 |
| H | 254.0012220000 | 182.3954320000 | 393.9209030000 |
| H | 254.7064280000 | 180.9465740000 | 393.3960950000 |
| H | 253.7446350000 | 180.9720910000 | 394.8641720000 |
| C | 250.7218750000 | 189.7719140000 | 397.2658080000 |
| C | 251.7060240000 | 190.2218780000 | 396.2069210000 |
| O | 251.8673320000 | 191.4545800000 | 396.0241840000 |
| C | 250.5364800000 | 188.2822140000 | 397.6449730000 |
| C | 249.3525710000 | 187.6963930000 | 396.8386770000 |
| C | 250.3438480000 | 188.1645960000 | 399.1648960000 |
| C | 248.9536320000 | 186.2553460000 | 397.1692000000 |
| N | 252.1860570000 | 189.2759060000 | 395.4019000000 |
| C | 253.0112190000 | 189.6169460000 | 394.2560170000 |
| C | 252.3723900000 | 189.5291300000 | 392.8819240000 |
| O | 251.1375490000 | 189.4603510000 | 392.7354170000 |
| N | 253.2205140000 | 189.6571500000 | 391.8670170000 |
| C | 252.7886420000 | 189.7523290000 | 390.4779890000 |

|   |                |                |                |
|---|----------------|----------------|----------------|
| C | 252.6395510000 | 188.3764130000 | 389.8628300000 |
| O | 253.3269040000 | 188.0317910000 | 388.8974090000 |
| N | 251.7414190000 | 187.5944470000 | 390.4436720000 |
| C | 251.5653020000 | 186.1915040000 | 390.0795090000 |
| C | 251.0629680000 | 185.4121460000 | 391.3128230000 |
| C | 249.7677340000 | 185.9305340000 | 391.8665420000 |
| C | 249.6346890000 | 186.7950610000 | 392.9207450000 |
| C | 248.4312510000 | 185.6321810000 | 391.4094710000 |
| N | 248.2852410000 | 187.0159290000 | 393.1918190000 |
| C | 247.5259480000 | 186.3506240000 | 392.2380960000 |
| C | 247.9162410000 | 184.8139730000 | 390.3923460000 |
| C | 246.1426480000 | 186.2884490000 | 392.0626420000 |
| C | 246.5388650000 | 184.7490610000 | 390.2104990000 |
| C | 245.6612720000 | 185.4830750000 | 391.0336240000 |
| H | 251.4474320000 | 187.7286380000 | 397.4110690000 |
| H | 249.4613730000 | 188.7335080000 | 399.4917110000 |
| H | 251.2345390000 | 188.5290240000 | 399.6840990000 |
| H | 250.2287900000 | 187.1277210000 | 399.4835250000 |
| H | 248.4771120000 | 188.3438540000 | 397.0033980000 |
| H | 249.5904060000 | 187.7767390000 | 395.7685060000 |
| H | 248.6383400000 | 186.1555350000 | 398.2112620000 |
| H | 248.1220710000 | 185.9195900000 | 396.5422360000 |
| H | 249.7763850000 | 185.5568690000 | 397.0083230000 |
| H | 251.0087570000 | 190.3320570000 | 398.1631380000 |
| H | 253.3382960000 | 190.6464450000 | 394.3944720000 |
| H | 253.9171340000 | 189.0203770000 | 394.2735680000 |
| H | 252.1058760000 | 188.2943380000 | 395.6349520000 |
| H | 251.8383590000 | 190.2975100000 | 390.4446060000 |
| H | 254.2383770000 | 189.5610250000 | 391.9968020000 |
| H | 251.8270290000 | 185.4731510000 | 392.0927260000 |
| H | 250.9603890000 | 184.3520230000 | 391.0526990000 |
| H | 250.4010640000 | 187.2723500000 | 393.5112210000 |
| H | 247.9558280000 | 187.7883920000 | 393.7496930000 |
| H | 248.5889430000 | 184.2421320000 | 389.7592310000 |
| H | 246.1289250000 | 184.1210030000 | 389.4242330000 |
| H | 245.4669940000 | 186.8419930000 | 392.7091530000 |
| H | 244.5895540000 | 185.4133140000 | 390.8686750000 |
| H | 252.5548050000 | 185.8150520000 | 389.7966470000 |
| H | 251.1755010000 | 187.9775370000 | 391.1951500000 |
| H | 253.5556630000 | 190.2835210000 | 389.9148990000 |
| H | 250.9372440000 | 186.0082860000 | 389.2328240000 |
| H | 249.7487980000 | 190.1330640000 | 397.0058230000 |
| C | 257.4170180000 | 180.5496190000 | 392.8123970000 |
| C | 257.7049190000 | 181.6744160000 | 391.7880510000 |

|   |                |                |                |
|---|----------------|----------------|----------------|
| C | 256.4305430000 | 182.1722100000 | 391.1364620000 |
| C | 255.7030440000 | 183.2224590000 | 391.7146650000 |
| C | 255.9123130000 | 181.5593790000 | 389.9866990000 |
| C | 254.4895600000 | 183.6431020000 | 391.1674660000 |
| C | 254.7002860000 | 181.9772480000 | 389.4331150000 |
| C | 253.9830080000 | 183.0206220000 | 390.0246690000 |
| H | 258.1909370000 | 182.5068010000 | 392.3095960000 |
| H | 258.4098060000 | 181.3213980000 | 391.0255310000 |
| H | 256.4678640000 | 180.7476490000 | 389.5209810000 |
| H | 256.0851530000 | 183.7217170000 | 392.6010130000 |
| H | 254.3193070000 | 181.4928980000 | 388.5374400000 |
| H | 253.9592620000 | 184.4682810000 | 391.6291070000 |
| H | 253.0417340000 | 183.3527880000 | 389.5955740000 |
| H | 258.2923950000 | 180.3823680000 | 393.4505980000 |
| H | 256.6113710000 | 180.8878910000 | 393.4299720000 |
| H | 257.1875720000 | 179.6226060000 | 392.3297990000 |
| C | 256.5883240000 | 185.6261280000 | 388.1369230000 |
| C | 256.7287440000 | 186.8731450000 | 389.0351400000 |
| C | 256.7742500000 | 186.4671560000 | 390.5126050000 |
| C | 257.9657760000 | 187.7014520000 | 388.6629380000 |
| H | 255.8398310000 | 187.5008110000 | 388.8898740000 |
| H | 258.0201730000 | 188.6080910000 | 389.2769140000 |
| H | 258.8887640000 | 187.1281460000 | 388.8238780000 |
| H | 257.9453490000 | 188.0103570000 | 387.6104120000 |
| H | 256.8440140000 | 187.3396730000 | 391.1638080000 |
| H | 257.6343410000 | 185.8116980000 | 390.7126040000 |
| H | 255.8738320000 | 185.9233830000 | 390.7995220000 |
| H | 255.6121150000 | 185.1614280000 | 388.3293230000 |
| H | 256.5961940000 | 185.9045290000 | 387.1038060000 |
| H | 257.3115520000 | 184.8931960000 | 388.4278720000 |
| C | 257.8298250000 | 191.8647110000 | 391.3055300000 |
| C | 258.2133250000 | 190.5334960000 | 391.9362090000 |
| C | 256.9948650000 | 189.7138640000 | 392.3306340000 |
| O | 255.9910400000 | 189.6808310000 | 391.5996710000 |
| N | 257.1447560000 | 188.9803800000 | 393.4465730000 |
| H | 258.8626850000 | 190.6747020000 | 392.8002010000 |
| H | 258.7655070000 | 189.9219270000 | 391.2092780000 |
| H | 257.7364510000 | 189.3643640000 | 394.1859110000 |
| H | 256.3652820000 | 188.4026190000 | 393.7504050000 |
| H | 257.1039310000 | 191.6732210000 | 390.5079040000 |
| H | 258.6811120000 | 192.3354150000 | 390.8598300000 |
| H | 257.3481020000 | 192.5081980000 | 392.0117640000 |
| C | 257.2030720000 | 182.8222950000 | 398.2411400000 |
| C | 256.2069930000 | 182.9722980000 | 399.3890710000 |

|   |                |                |                |
|---|----------------|----------------|----------------|
| O | 256.2876910000 | 183.9230220000 | 400.1668070000 |
| C | 257.0151010000 | 183.9166050000 | 397.1742130000 |
| C | 258.1423770000 | 184.0251820000 | 396.1610210000 |
| C | 259.4468060000 | 183.5796720000 | 396.4112460000 |
| C | 257.9100090000 | 184.6979050000 | 394.9504090000 |
| C | 260.4882560000 | 183.8260430000 | 395.5140100000 |
| C | 258.9393450000 | 184.9560520000 | 394.0473680000 |
| C | 260.2454860000 | 184.5334110000 | 394.3339040000 |
| O | 261.3006760000 | 184.7605520000 | 393.4977530000 |
| N | 255.2919070000 | 182.0103590000 | 399.5379370000 |
| C | 254.2768300000 | 182.0753700000 | 400.5798610000 |
| C | 253.0549250000 | 182.8554920000 | 400.1428150000 |
| O | 252.1596290000 | 183.0684290000 | 400.9596910000 |
| N | 253.0010500000 | 183.1645790000 | 398.8588310000 |
| C | 251.9221530000 | 184.0206930000 | 398.3808010000 |
| C | 252.4682490000 | 184.9417380000 | 397.3161430000 |
| C | 253.1670950000 | 186.1420410000 | 397.9115320000 |
| O | 252.9691360000 | 186.5578160000 | 399.0361590000 |
| O | 253.9254830000 | 186.6995640000 | 397.0015570000 |
| H | 256.9094870000 | 184.8788320000 | 397.6872010000 |
| H | 256.0661970000 | 183.7631610000 | 396.6446190000 |
| H | 256.9111200000 | 185.0561540000 | 394.7312470000 |
| H | 259.6803710000 | 183.0473710000 | 397.3285610000 |
| H | 258.7339930000 | 185.5063910000 | 393.1329650000 |
| H | 261.5030930000 | 183.5028240000 | 395.7228560000 |
| H | 261.1823750000 | 185.6229540000 | 393.0717820000 |
| H | 258.1811600000 | 182.9393340000 | 398.7165660000 |
| H | 254.6951530000 | 182.5861520000 | 401.4493400000 |
| H | 253.9687940000 | 181.0669110000 | 400.8670610000 |
| H | 255.2767990000 | 181.2382700000 | 398.8885900000 |
| H | 251.6731540000 | 185.3334210000 | 396.6775540000 |
| H | 253.1408930000 | 184.4295310000 | 396.6215360000 |
| H | 251.5607740000 | 184.6004400000 | 399.2325780000 |
| H | 253.8208670000 | 183.0628500000 | 398.2827300000 |
| H | 257.1736930000 | 181.8504670000 | 397.7943870000 |
| H | 251.0845350000 | 183.5184970000 | 397.9436560000 |
| C | 252.3745140000 | 194.4248920000 | 391.2271740000 |
| C | 251.5203670000 | 193.8985310000 | 392.3774330000 |
| O | 251.1818320000 | 194.9366340000 | 393.3325950000 |
| C | 252.2195540000 | 192.7325130000 | 393.0578930000 |
| H | 250.5444300000 | 193.5831520000 | 391.9891670000 |
| H | 251.5821260000 | 192.1801540000 | 393.7438440000 |
| H | 253.0845350000 | 193.0973090000 | 393.6283860000 |
| H | 252.6018550000 | 192.0323570000 | 392.3136040000 |

|   |                |                |                |
|---|----------------|----------------|----------------|
| H | 251.9817150000 | 195.1230670000 | 393.8457160000 |
| H | 252.2564420000 | 193.7324040000 | 390.3827970000 |
| H | 253.4131320000 | 194.3659120000 | 391.4775630000 |
| H | 252.0456620000 | 195.3824430000 | 390.8809740000 |
| C | 252.9229320000 | 197.6776770000 | 399.7280460000 |
| C | 251.9289630000 | 197.6087100000 | 398.5540210000 |
| O | 251.9832370000 | 196.6739530000 | 397.7314480000 |
| C | 252.8065220000 | 196.3984440000 | 400.5729930000 |
| O | 251.4412950000 | 196.3512300000 | 400.9981010000 |
| C | 253.7719690000 | 196.4111370000 | 401.7571480000 |
| N | 251.0510080000 | 198.6037450000 | 398.4339890000 |
| C | 250.2740630000 | 198.7447630000 | 397.1999590000 |
| C | 248.8804450000 | 198.0829380000 | 397.3163500000 |
| C | 248.3376600000 | 197.4046610000 | 396.0440260000 |
| C | 249.2398920000 | 196.3172660000 | 395.4126010000 |
| N | 249.9182010000 | 195.5103530000 | 396.4234560000 |
| C | 250.1586980000 | 194.1960630000 | 396.3834700000 |
| N | 249.7091750000 | 193.4268290000 | 395.3616530000 |
| N | 250.8102860000 | 193.6082250000 | 397.3939010000 |
| H | 253.0386410000 | 195.5408280000 | 399.9298620000 |
| H | 253.6936790000 | 195.4842620000 | 402.3328400000 |
| H | 253.5463130000 | 197.2534410000 | 402.4216770000 |
| H | 254.8081340000 | 196.5045550000 | 401.4126510000 |
| H | 251.2986900000 | 195.5160260000 | 401.4764610000 |
| H | 253.9179250000 | 197.7112680000 | 399.2652040000 |
| H | 248.9467390000 | 197.3269090000 | 398.1052460000 |
| H | 248.1452620000 | 198.8155520000 | 397.6674850000 |
| H | 247.3744090000 | 196.9536860000 | 396.3072420000 |
| H | 248.1313240000 | 198.1495130000 | 395.2650910000 |
| H | 249.9887480000 | 196.7630180000 | 394.7478170000 |
| H | 248.6252720000 | 195.6687770000 | 394.7857800000 |
| H | 250.5709510000 | 196.0252630000 | 397.0283940000 |
| H | 250.0852050000 | 192.4810690000 | 395.3888200000 |
| H | 249.8475350000 | 193.8729810000 | 394.4567050000 |
| H | 251.2577550000 | 194.1770840000 | 398.1036350000 |
| H | 251.2541540000 | 192.7082050000 | 397.1531160000 |
| H | 250.8626910000 | 198.2533630000 | 396.4212220000 |
| H | 251.0161560000 | 199.3146120000 | 399.1478690000 |
| H | 252.8224950000 | 198.5271910000 | 400.3708040000 |
| H | 250.2455750000 | 199.7824050000 | 396.9403670000 |
| C | 262.4397860000 | 198.8487360000 | 397.8030600000 |
| C | 261.3738350000 | 197.9836670000 | 397.1570730000 |
| O | 260.2222300000 | 197.9804320000 | 397.6299230000 |
| N | 261.7388800000 | 197.3096500000 | 396.0761030000 |



|   |                |                |                |
|---|----------------|----------------|----------------|
| C | 260.9409370000 | 196.2035970000 | 395.5761320000 |
| C | 261.7589980000 | 194.9406520000 | 395.8171980000 |
| O | 262.7416960000 | 194.7407440000 | 395.0943380000 |
| C | 260.5456650000 | 196.3454640000 | 394.0954380000 |
| C | 259.7278220000 | 195.1163910000 | 393.6672010000 |
| C | 259.7657170000 | 197.6452210000 | 393.8665180000 |
| N | 261.4030230000 | 194.1806740000 | 396.8512230000 |
| C | 262.2440980000 | 193.0757420000 | 397.2942690000 |
| C | 263.7130720000 | 193.5308170000 | 397.3752510000 |
| O | 263.9573370000 | 194.5963970000 | 397.9560780000 |
| C | 262.0639180000 | 191.8436460000 | 396.4215940000 |
| C | 260.6494090000 | 191.4788170000 | 396.2603860000 |
| N | 259.7750970000 | 191.2773200000 | 397.3055600000 |
| C | 259.9374990000 | 191.2130770000 | 395.1194140000 |
| C | 258.5966430000 | 190.8731070000 | 396.7607180000 |
| N | 258.6563180000 | 190.8243400000 | 395.4347310000 |
| N | 264.6520740000 | 192.7718210000 | 396.8362480000 |
| C | 266.0420760000 | 193.1748200000 | 397.0131920000 |
| C | 266.3610680000 | 194.3288050000 | 396.0731710000 |
| O | 267.3199300000 | 195.0721340000 | 396.3164230000 |
| C | 267.0179790000 | 191.9973410000 | 396.8304210000 |
| O | 267.0815430000 | 191.4926870000 | 395.5150080000 |
| N | 265.6370370000 | 194.4208050000 | 394.9661900000 |
| C | 265.9150260000 | 195.4717900000 | 393.9891710000 |
| C | 265.0329040000 | 195.2405910000 | 392.7449180000 |
| O | 265.1965650000 | 193.9440520000 | 392.1927490000 |
| C | 265.3766660000 | 196.2414260000 | 391.6452400000 |
| H | 263.0014270000 | 199.4187610000 | 397.0554790000 |
| H | 261.4738220000 | 196.3652870000 | 393.5109980000 |
| H | 258.8193720000 | 195.0211660000 | 394.2758590000 |
| H | 259.4209050000 | 195.2012770000 | 392.6199470000 |
| H | 260.3031260000 | 194.1930090000 | 393.7741220000 |
| H | 260.3488800000 | 198.5222680000 | 394.1652550000 |
| H | 258.8355390000 | 197.6464480000 | 394.4492470000 |
| H | 259.4995280000 | 197.7569160000 | 392.8102320000 |
| H | 260.0240450000 | 196.1885350000 | 396.1691020000 |
| H | 262.7275820000 | 197.2495060000 | 395.8546210000 |
| H | 262.6332520000 | 191.0054450000 | 396.8406920000 |
| H | 262.4597830000 | 192.0629100000 | 395.4306850000 |
| H | 260.3144030000 | 191.2708440000 | 394.1086780000 |
| H | 257.7539260000 | 190.5705520000 | 397.3541920000 |
| H | 261.9435240000 | 192.8562300000 | 398.3234520000 |
| H | 260.5462600000 | 194.3717400000 | 397.3695810000 |
| H | 266.7497040000 | 191.2182080000 | 397.5602560000 |

|   |                |                |                |
|---|----------------|----------------|----------------|
| H | 268.0122050000 | 192.3839920000 | 397.0810830000 |
| H | 266.3038630000 | 190.9160830000 | 395.3837240000 |
| H | 266.1618890000 | 193.5702690000 | 398.0255100000 |
| H | 264.4678850000 | 191.8831230000 | 396.3747100000 |
| H | 263.9878850000 | 195.3890820000 | 393.0594840000 |
| H | 265.2911270000 | 197.2739660000 | 392.0032710000 |
| H | 264.7073580000 | 196.1061650000 | 390.7906090000 |
| H | 266.4036500000 | 196.0755090000 | 391.3019310000 |
| H | 264.6818170000 | 193.2985040000 | 392.7107100000 |
| H | 266.9793440000 | 195.4495300000 | 393.7359350000 |
| H | 264.7712650000 | 193.9038210000 | 394.8905770000 |
| H | 259.9845940000 | 191.3839250000 | 398.3144260000 |
| H | 262.0015610000 | 199.5148990000 | 398.5165630000 |
| H | 263.1553900000 | 198.1955360000 | 398.3173280000 |
| H | 265.6769230000 | 196.4271170000 | 394.4081680000 |
| C | 259.4897310000 | 190.5143660000 | 408.0813510000 |
| C | 258.6587620000 | 191.0442650000 | 406.9172830000 |
| O | 258.5480390000 | 190.3977480000 | 405.8689480000 |
| C | 260.4799320000 | 189.4264910000 | 407.6488560000 |
| O | 259.8856490000 | 188.1242630000 | 407.5331140000 |
| N | 258.0657450000 | 192.2112760000 | 407.1151720000 |
| C | 257.1357700000 | 192.7791890000 | 406.1320980000 |
| C | 257.8807970000 | 193.5141070000 | 405.0200630000 |
| O | 259.1044220000 | 193.7002030000 | 405.1112760000 |
| C | 256.2786500000 | 193.7313500000 | 406.9847570000 |
| C | 257.3101070000 | 194.2912470000 | 407.9760820000 |
| C | 258.1986050000 | 193.0757040000 | 408.2992560000 |
| N | 257.1568240000 | 193.9310180000 | 403.9930070000 |
| C | 257.7578510000 | 194.5809260000 | 402.8279760000 |
| C | 257.1030000000 | 194.0989100000 | 401.5279690000 |
| C | 257.2291070000 | 192.6140020000 | 401.2881180000 |
| N | 257.0013440000 | 192.0824660000 | 400.0285270000 |
| C | 257.4811820000 | 191.5139600000 | 402.0890970000 |
| C | 257.1154650000 | 190.7300330000 | 400.1185640000 |
| N | 257.4105140000 | 190.3498360000 | 401.3484090000 |
| H | 261.3152890000 | 189.3840270000 | 408.3619520000 |
| H | 260.8875630000 | 189.6428700000 | 406.6606860000 |
| H | 259.5236020000 | 187.8636300000 | 408.3887470000 |
| H | 260.0629450000 | 191.3296590000 | 408.5365390000 |
| H | 255.5040250000 | 193.1553700000 | 407.5021780000 |
| H | 255.7834900000 | 194.4922770000 | 406.3787920000 |
| H | 256.8647450000 | 194.7265430000 | 408.8746350000 |
| H | 257.9134580000 | 195.0604650000 | 407.4843410000 |
| H | 257.8485960000 | 192.5506770000 | 409.1979580000 |

|   |                |                |                |
|---|----------------|----------------|----------------|
| H | 259.2417770000 | 193.3679460000 | 408.4571180000 |
| H | 256.5339730000 | 191.9769970000 | 405.6954620000 |
| H | 256.0427410000 | 194.3921740000 | 401.5289570000 |
| H | 257.5696570000 | 194.6352430000 | 400.6924290000 |
| H | 257.7282120000 | 191.4831510000 | 403.1395030000 |
| H | 256.9415030000 | 190.0646480000 | 399.2868660000 |
| H | 258.8080580000 | 194.2912520000 | 402.8244220000 |
| H | 256.1544980000 | 193.7235090000 | 403.9590580000 |
| H | 256.7805630000 | 192.5910080000 | 399.1620040000 |
| H | 257.7515080000 | 195.6461040000 | 402.9292550000 |
| H | 258.8823310000 | 190.1066000000 | 408.8621790000 |
| C | 262.5168400000 | 191.6281260000 | 404.4244280000 |
| C | 261.4129990000 | 190.8045410000 | 403.7057490000 |
| C | 261.0431300000 | 191.3210220000 | 402.3463060000 |
| N | 260.7274850000 | 192.6487300000 | 402.1107340000 |
| C | 260.9073870000 | 190.7117540000 | 401.1184780000 |
| C | 260.4000640000 | 192.7855730000 | 400.7921730000 |
| N | 260.5096440000 | 191.6305380000 | 400.1608650000 |
| H | 260.5152380000 | 190.7568250000 | 404.3368860000 |
| H | 261.7604840000 | 189.7774350000 | 403.5718590000 |
| H | 261.0304550000 | 189.6669280000 | 400.8734000000 |
| H | 260.0896060000 | 193.7151400000 | 400.3354030000 |
| H | 262.8513780000 | 191.0759470000 | 405.3108240000 |
| H | 260.6310110000 | 193.3428820000 | 402.8390990000 |
| H | 262.1234480000 | 192.5625320000 | 404.7665220000 |
| H | 263.3515270000 | 191.7182260000 | 403.7610420000 |
| C | 247.8968980000 | 194.0107940000 | 404.4931570000 |
| C | 248.2018860000 | 195.4878030000 | 404.7371180000 |
| O | 247.4392020000 | 196.1679310000 | 405.4283440000 |
| C | 246.8102050000 | 193.8237450000 | 403.4316120000 |
| O | 247.2304760000 | 194.3093830000 | 402.1627230000 |
| N | 249.3138700000 | 195.9618030000 | 404.1770870000 |
| C | 249.8018600000 | 197.3148150000 | 404.4650490000 |
| H | 245.9206600000 | 194.4011000000 | 403.7031090000 |
| H | 246.5249650000 | 192.7599380000 | 403.3836040000 |
| H | 248.0985800000 | 193.9256350000 | 401.9715370000 |
| H | 248.7995410000 | 193.4960330000 | 404.1281320000 |
| H | 249.0911220000 | 197.7703550000 | 405.1551580000 |
| H | 249.8684100000 | 195.3635560000 | 403.5768610000 |
| H | 250.7882450000 | 197.2666380000 | 404.9413240000 |
| H | 249.8830000000 | 197.9214530000 | 403.5873780000 |
| H | 247.6468730000 | 193.5209220000 | 405.4109870000 |
| C | 248.0799800000 | 189.8886070000 | 402.3844170000 |
| C | 249.0950770000 | 189.0787130000 | 403.1734010000 |

|   |                |                |                |
|---|----------------|----------------|----------------|
| O | 248.7586140000 | 188.1330730000 | 403.8845680000 |
| N | 250.3660440000 | 189.4517880000 | 403.0173110000 |
| C | 251.5131280000 | 188.7688930000 | 403.5982810000 |
| C | 251.3882420000 | 188.5089510000 | 405.0893020000 |
| O | 251.8545890000 | 187.4985500000 | 405.6337840000 |
| N | 250.8692160000 | 189.5059460000 | 405.7982900000 |
| C | 250.6663130000 | 189.3999970000 | 407.2253080000 |
| H | 248.3922330000 | 190.9324820000 | 402.2587640000 |
| H | 248.0257450000 | 189.4648590000 | 401.3732800000 |
| H | 252.3950310000 | 189.3930570000 | 403.4441300000 |
| H | 251.6924910000 | 187.8122520000 | 403.1094240000 |
| H | 250.5540920000 | 190.2555830000 | 402.4426620000 |
| H | 251.6192730000 | 189.3197430000 | 407.7614190000 |
| H | 250.1722150000 | 190.3112810000 | 407.5712370000 |
| H | 250.5591400000 | 190.3360940000 | 405.3162370000 |
| H | 247.0858900000 | 189.8760150000 | 402.7800520000 |
| H | 250.0645750000 | 188.5600940000 | 407.5034690000 |
| C | 252.9378530000 | 183.9059790000 | 405.2635470000 |
| C | 254.0004680000 | 184.9975270000 | 405.0807530000 |
| C | 253.9420330000 | 185.6533960000 | 403.7399920000 |
| N | 254.8752550000 | 186.5805870000 | 403.2935630000 |
| C | 252.9299640000 | 185.6949850000 | 402.8102360000 |
| C | 254.3819860000 | 187.1214520000 | 402.1364620000 |
| N | 253.2021770000 | 186.6224870000 | 401.8292280000 |
| H | 253.8511620000 | 185.7758900000 | 405.8328480000 |
| H | 255.0013660000 | 184.5741670000 | 405.2604930000 |
| H | 252.0215120000 | 185.1112740000 | 402.7924250000 |
| H | 254.9393420000 | 187.8418780000 | 401.5556740000 |
| H | 253.0276420000 | 183.1952180000 | 404.4299590000 |
| H | 255.8266830000 | 186.7345120000 | 403.6221240000 |
| H | 253.0726070000 | 183.3277390000 | 406.1537030000 |
| H | 251.9386620000 | 184.2827480000 | 405.1959970000 |
| C | 256.1358660000 | 184.2685110000 | 410.0932670000 |
| C | 254.8627970000 | 185.0196980000 | 409.6631750000 |
| C | 254.9282180000 | 185.6057730000 | 408.2345290000 |
| C | 255.8630290000 | 186.8183250000 | 408.0516760000 |
| N | 255.9537760000 | 187.3529380000 | 406.6829880000 |
| C | 255.2934850000 | 188.4481740000 | 406.2471110000 |
| N | 254.1406720000 | 188.8281600000 | 406.8689610000 |
| N | 255.7846180000 | 189.1750520000 | 405.2580480000 |
| H | 254.6336210000 | 185.8168040000 | 410.3840310000 |
| H | 254.0095680000 | 184.3313990000 | 409.6926650000 |
| H | 253.9186560000 | 185.9030490000 | 407.9337460000 |
| H | 255.2305770000 | 184.8156990000 | 407.5391810000 |

|   |                |                |                |
|---|----------------|----------------|----------------|
| H | 255.5344730000 | 187.6316290000 | 408.7082340000 |
| H | 256.8848830000 | 186.5507170000 | 408.3460360000 |
| H | 256.7368800000 | 187.0812360000 | 406.0877900000 |
| H | 253.4334080000 | 188.0923630000 | 406.8979510000 |
| H | 253.7479830000 | 189.6755370000 | 406.4538900000 |
| H | 255.1887640000 | 189.8940170000 | 404.8475600000 |
| H | 256.6712060000 | 188.9097580000 | 404.8260030000 |
| H | 256.9583690000 | 184.9953450000 | 410.1883750000 |
| H | 256.0755190000 | 183.8111360000 | 411.0587020000 |
| H | 256.4554930000 | 183.6147070000 | 409.3088700000 |
| C | 258.2849300000 | 182.3635890000 | 407.6132630000 |
| C | 259.1092420000 | 183.2957540000 | 406.6922790000 |
| C | 259.2723700000 | 182.7455670000 | 405.2642050000 |
| C | 259.8239020000 | 183.8300640000 | 404.3431540000 |
| O | 260.8486530000 | 184.4405300000 | 404.6362040000 |
| N | 259.1105850000 | 184.0761880000 | 403.2093590000 |
| H | 258.5773790000 | 184.2553530000 | 406.6208690000 |
| H | 260.0973530000 | 183.5290770000 | 407.1002810000 |
| H | 259.9747230000 | 181.9032480000 | 405.2605120000 |
| H | 258.3115080000 | 182.3655610000 | 404.8947700000 |
| H | 258.1857640000 | 183.7027800000 | 403.0571740000 |
| H | 259.3460890000 | 184.9081180000 | 402.6827430000 |
| H | 258.8614100000 | 181.4988260000 | 407.9573980000 |
| H | 257.9773220000 | 182.9532090000 | 408.4514900000 |
| H | 257.4950910000 | 182.0183080000 | 406.9793570000 |
| C | 266.7507380000 | 184.8294110000 | 405.9897060000 |
| C | 266.9164000000 | 184.5275970000 | 404.4879500000 |
| C | 266.4671900000 | 185.6759990000 | 403.5590560000 |
| C | 265.0260240000 | 186.1079570000 | 403.7924280000 |
| O | 264.7069350000 | 186.6488510000 | 404.8631050000 |
| N | 264.1392650000 | 185.8544980000 | 402.8111190000 |
| H | 266.3714680000 | 183.6120630000 | 404.2246640000 |
| H | 267.9725030000 | 184.3290190000 | 404.2655720000 |
| H | 267.0858160000 | 186.5584370000 | 403.7579390000 |
| H | 266.6294260000 | 185.3939390000 | 402.5126090000 |
| H | 263.1863660000 | 186.2297170000 | 402.9090000000 |
| H | 264.4459330000 | 185.4980640000 | 401.9197250000 |
| H | 265.7109440000 | 184.6914060000 | 406.2968720000 |
| H | 267.3703190000 | 184.1798560000 | 406.5720270000 |
| H | 266.9701810000 | 185.8609910000 | 406.1702230000 |
| C | 265.3832440000 | 185.7487040000 | 399.2267180000 |
| C | 264.4312750000 | 186.2206410000 | 398.1124760000 |
| C | 264.8181610000 | 187.6245780000 | 397.6021050000 |
| C | 264.6154920000 | 188.7445680000 | 398.6168640000 |

|    |                |                |                |
|----|----------------|----------------|----------------|
| O  | 265.5210490000 | 189.4834500000 | 398.9884010000 |
| N  | 263.3434590000 | 188.8520870000 | 399.1314070000 |
| H  | 263.3893130000 | 186.2201020000 | 398.4562730000 |
| H  | 264.4697620000 | 185.5263160000 | 397.2655310000 |
| H  | 265.8756910000 | 187.6513560000 | 397.3251770000 |
| H  | 264.2505120000 | 187.8656660000 | 396.7022320000 |
| H  | 263.1520590000 | 189.6841410000 | 399.6737050000 |
| H  | 262.5470570000 | 188.4137190000 | 398.6838320000 |
| H  | 265.3490530000 | 186.4660410000 | 400.0597340000 |
| H  | 266.3826300000 | 185.7928110000 | 398.8470050000 |
| H  | 265.1504780000 | 184.7840630000 | 399.6269520000 |
| C  | 264.6901830000 | 186.5738150000 | 390.9080180000 |
| C  | 266.0211440000 | 186.4578400000 | 391.6570910000 |
| O  | 266.9671610000 | 185.8614880000 | 391.1225250000 |
| N  | 266.1040810000 | 187.0408770000 | 392.8470770000 |
| C  | 267.3460400000 | 187.0189030000 | 393.6281430000 |
| H  | 264.0515220000 | 187.3727040000 | 391.2942440000 |
| H  | 264.1469150000 | 185.6266930000 | 390.9901040000 |
| H  | 268.1853960000 | 186.8791370000 | 392.9467790000 |
| H  | 265.2697980000 | 187.4174730000 | 393.2821760000 |
| H  | 267.4425180000 | 187.9549060000 | 394.1844390000 |
| H  | 264.9293500000 | 186.7388150000 | 389.8782240000 |
| H  | 267.2858450000 | 186.1920680000 | 394.3046200000 |
| O  | 254.4633600000 | 186.5556430000 | 392.8152820000 |
| O  | 255.1333920000 | 187.5253410000 | 394.9868180000 |
| O  | 254.5425800000 | 184.9648010000 | 394.6867230000 |
| Cl | 254.1544360000 | 186.3404800000 | 394.2535210000 |
| O  | 252.6820470000 | 186.5828370000 | 394.4844660000 |

**The intermediate resulted from the O-Cl cleavage of perchlorate optimized using the bigger model**

|    |                |                |                |
|----|----------------|----------------|----------------|
| Mo | 255.3953993946 | 188.1251972035 | 397.0189293661 |
| P  | 253.3283951885 | 192.5575711950 | 404.5838763763 |
| O  | 254.3322596766 | 193.4660670190 | 403.9334784952 |
| O  | 253.7100876996 | 191.3266114629 | 405.3482778084 |
| O  | 252.2929827371 | 191.9670135727 | 403.3119440172 |
| O  | 252.8078539705 | 193.2526993333 | 401.1465994079 |
| P  | 251.6910285861 | 192.9360598990 | 402.2128950147 |
| O  | 251.0536279220 | 194.1758677152 | 402.7569021902 |
| O  | 250.6010526516 | 192.0029889378 | 401.4519030099 |
| O  | 252.2202483732 | 193.3733358679 | 405.4428501990 |

|   |                |                |                |
|---|----------------|----------------|----------------|
| C | 253.6665999505 | 192.1968676425 | 400.5837660475 |
| C | 253.4339972079 | 192.2328878761 | 399.0793365575 |
| O | 253.7452588112 | 193.5811909414 | 398.7052795024 |
| C | 254.1673441192 | 191.1730215932 | 398.2918887393 |
| S | 253.8276742706 | 189.4898909800 | 398.6411616647 |
| C | 254.9450628030 | 191.5285800371 | 397.2464334920 |
| S | 255.5882813276 | 190.3749409946 | 396.1440721535 |
| C | 255.2712638874 | 192.9523203779 | 396.8975211063 |
| N | 256.5246529329 | 193.3373024728 | 397.5610209351 |
| C | 256.7373336064 | 194.7207952060 | 397.7374574615 |
| C | 258.0170208175 | 195.1437078419 | 398.1734718193 |
| O | 259.0030620952 | 194.4006050545 | 398.3738689710 |
| N | 258.1233794865 | 196.5214362922 | 398.3760043440 |
| C | 257.1056568977 | 197.3869502529 | 398.1140622256 |
| N | 257.4025483037 | 198.7243480189 | 398.2279090671 |
| N | 255.8878791480 | 196.9924910932 | 397.8041414817 |
| C | 255.7120714848 | 195.6486387668 | 397.6213196584 |
| N | 254.4551204581 | 195.2337002667 | 397.2416044881 |
| C | 254.1181517250 | 193.8470539985 | 397.3398711384 |
| P | 262.2149750911 | 187.8803057182 | 394.7169320954 |
| O | 262.3571856184 | 189.4274006866 | 394.3088655452 |
| O | 260.7810381136 | 187.5332295253 | 394.0311633312 |
| O | 263.3167839002 | 186.9787177404 | 394.3269983312 |
| O | 261.9457773918 | 187.7721653278 | 396.3068362101 |
| C | 260.7496401403 | 188.2314379312 | 396.9659190711 |
| C | 260.1173341547 | 187.1198521837 | 397.8192434599 |
| O | 260.7172107102 | 187.1778845978 | 399.1262777881 |
| C | 258.6097987025 | 187.2869985356 | 397.9463299867 |
| S | 257.6917224871 | 187.5309711619 | 396.5046748218 |
| C | 257.9499550735 | 187.1603085844 | 399.1302165540 |
| S | 256.2575330052 | 187.5087514470 | 399.2493327101 |
| C | 258.6299965096 | 186.7166971415 | 400.3941327025 |
| N | 258.6411832790 | 187.7621449853 | 401.4126421467 |
| C | 259.2593597360 | 187.3822207666 | 402.5948544708 |
| C | 258.7305000789 | 187.5631043353 | 403.9007675969 |
| O | 257.5785220557 | 187.9562203789 | 404.2210347392 |
| N | 259.6223487253 | 187.2474182615 | 404.9357762750 |
| C | 260.7890222991 | 186.5726827210 | 404.7473672568 |
| N | 261.5290281996 | 186.2195925332 | 405.8390375630 |
| N | 261.1815102746 | 186.2168526998 | 403.5403160267 |
| C | 260.4239755054 | 186.6265038520 | 402.4887224245 |
| N | 260.8889686856 | 186.2431017366 | 401.2461742358 |
| C | 260.0803390808 | 186.2917892036 | 400.0578489314 |
| P | 263.7982348253 | 190.3178199224 | 394.0545312210 |

|   |                |                |                |
|---|----------------|----------------|----------------|
| O | 263.3847435061 | 191.6562629105 | 393.5142454526 |
| O | 264.5857018116 | 190.1517394068 | 395.3297761063 |
| O | 264.4712471241 | 189.4453706928 | 392.8526858578 |
| H | 253.4219370186 | 191.2159236926 | 401.0027948234 |
| H | 254.6871765293 | 192.4587964058 | 400.8491398406 |
| H | 257.3340323000 | 192.8759190915 | 397.1434652248 |
| H | 259.0756069914 | 196.8903613072 | 398.4365313153 |
| H | 256.7273173583 | 199.3184699570 | 397.7678665744 |
| H | 258.3772826401 | 198.9552594379 | 398.0539650312 |
| H | 253.6896118713 | 195.8899994194 | 397.3837421427 |
| H | 261.0259155873 | 189.0594767824 | 397.6177535615 |
| H | 260.0236537106 | 188.5889120168 | 396.2381598027 |
| H | 260.3437336274 | 186.1505753124 | 397.3471697107 |
| H | 258.1081088481 | 185.8111485061 | 400.7545598018 |
| H | 257.8570045420 | 188.4138347533 | 401.4840580246 |
| H | 261.3442442277 | 186.7462204868 | 406.6829795937 |
| H | 262.5053520862 | 185.9891076592 | 405.6150565687 |
| H | 261.6269970904 | 185.5530959831 | 401.2637727143 |
| H | 260.0426680882 | 185.2918782848 | 399.5952745198 |
| H | 259.3245560774 | 187.4843756642 | 405.8785531975 |
| H | 260.1799692041 | 188.2891997065 | 393.9462583045 |
| H | 250.9068852117 | 191.6654496833 | 400.5948956584 |
| H | 264.4748952914 | 189.9865145617 | 392.0516724144 |
| H | 251.8525425467 | 194.0996810609 | 404.9122218875 |
| H | 252.3505231011 | 192.0553562901 | 398.9235282831 |
| H | 255.3538737441 | 193.0592448763 | 395.8050080411 |
| H | 253.2703086117 | 193.6350258297 | 396.6823942168 |
| C | 253.8150000000 | 181.3190000000 | 393.8550000000 |
| C | 252.5791329879 | 180.9303775592 | 393.0281292638 |
| C | 251.2872952951 | 181.5945617396 | 393.4748554355 |
| C | 251.2856346426 | 182.9297125089 | 393.9025982562 |
| C | 250.0526270178 | 180.9377892222 | 393.4017125992 |
| C | 250.1043556722 | 183.5909703667 | 394.2154518563 |
| C | 248.8534874508 | 181.5941710925 | 393.6965878110 |
| C | 248.8779209709 | 182.9342541005 | 394.0834393710 |
| O | 247.6827205084 | 183.5738137995 | 394.3212997482 |
| H | 252.4525091818 | 179.8381105718 | 393.0273370802 |
| H | 252.7766756759 | 181.2143822368 | 391.9847133767 |
| H | 250.0197739855 | 179.8966027149 | 393.0811264440 |
| H | 252.2098030831 | 183.4899681877 | 393.9807434374 |
| H | 247.8945791238 | 181.0912907024 | 393.6039406387 |
| H | 250.1505688142 | 184.6343004104 | 394.5126522383 |
| H | 247.8256789552 | 184.5208058800 | 394.1784797533 |
| H | 253.9351088524 | 182.4041028117 | 393.8918031331 |



|   |                |                |                |
|---|----------------|----------------|----------------|
| H | 254.7073923500 | 180.9467449100 | 393.3967838500 |
| H | 253.7456652600 | 180.9723263200 | 394.8649059600 |
| C | 250.7220000000 | 189.7720000000 | 397.2660000000 |
| C | 251.7060000000 | 190.2220000000 | 396.2070000000 |
| O | 251.9298692665 | 191.4585575831 | 396.0719980614 |
| C | 250.4922929230 | 188.2628497232 | 397.5373738907 |
| C | 249.3743189659 | 187.7555861118 | 396.5900282679 |
| C | 250.1591673746 | 188.0585858190 | 399.0222088160 |
| C | 248.9621103780 | 186.2891371583 | 396.7518628097 |
| N | 252.1860000000 | 189.2760000000 | 395.4020000000 |
| C | 253.0110000000 | 189.6170000000 | 394.2560000000 |
| C | 252.3720000000 | 189.5290000000 | 392.8820000000 |
| O | 251.1358986317 | 189.4610284565 | 392.7432904716 |
| N | 253.2200000000 | 189.6570000000 | 391.8670000000 |
| C | 252.7880000000 | 189.7520000000 | 390.4780000000 |
| C | 252.6390000000 | 188.3760000000 | 389.8630000000 |
| O | 253.3131431110 | 188.0421800094 | 388.8822793095 |
| N | 251.7410000000 | 187.5940000000 | 390.4440000000 |
| C | 251.5650000000 | 186.1910000000 | 390.0800000000 |
| C | 251.0693729136 | 185.3618587544 | 391.2763216756 |
| C | 249.6674306350 | 185.6868660114 | 391.6875204349 |
| C | 249.2901330827 | 186.5274704038 | 392.6993465079 |
| C | 248.4549355195 | 185.1513192813 | 391.1194380679 |
| N | 247.8988739351 | 186.5081783420 | 392.8381627552 |
| C | 247.3631803514 | 185.7021632829 | 391.8411402835 |
| C | 248.1981841531 | 184.2397733408 | 390.0825335827 |
| C | 246.0380846973 | 185.3845136994 | 391.5367954352 |
| C | 246.8810345620 | 183.9180982959 | 389.7729346071 |
| C | 245.8122708959 | 184.4915059670 | 390.4920723288 |
| H | 251.4140827055 | 187.7135532101 | 397.3395097050 |
| H | 249.2519236949 | 188.6174824722 | 399.2990414418 |
| H | 250.9949702696 | 188.3871860052 | 399.6472569084 |
| H | 249.9970259256 | 187.0052025166 | 399.2618720562 |
| H | 248.4847420399 | 188.3874426852 | 396.7494196721 |
| H | 249.6914697267 | 187.9290618919 | 395.5529646277 |
| H | 248.5485477737 | 186.0872804771 | 397.7457796811 |
| H | 248.1946140689 | 186.0149905034 | 396.0181307904 |
| H | 249.8041375068 | 185.6115599206 | 396.5961579679 |
| H | 251.0250868360 | 190.2793354106 | 398.1887373919 |
| H | 253.3580246690 | 190.6403578176 | 394.3996861951 |
| H | 253.9023469397 | 188.9882316449 | 394.2651854334 |
| H | 251.9287593547 | 188.2904864214 | 395.4846725901 |
| H | 251.8353172120 | 190.2950672945 | 390.4478043373 |
| H | 254.2306528575 | 189.5169857689 | 391.9984371477 |

|   |                |                |                |
|---|----------------|----------------|----------------|
| H | 251.7463303131 | 185.5218063654 | 392.1162025194 |
| H | 251.1327947759 | 184.2990756007 | 391.0088947890 |
| H | 249.9206615016 | 187.1045917546 | 393.3624646365 |
| H | 247.3789816961 | 187.2041057319 | 393.3501797466 |
| H | 249.0254994364 | 183.7941793568 | 389.5360698204 |
| H | 246.6686285706 | 183.2143611765 | 388.9719235372 |
| H | 245.2121044692 | 185.8108202096 | 392.1016559956 |
| H | 244.7897074334 | 184.2254525828 | 390.2338951361 |
| H | 252.5584663987 | 185.8265023109 | 389.7894292043 |
| H | 251.2259868963 | 187.9528685780 | 391.2431718797 |
| H | 253.5534569774 | 190.2860021043 | 389.9132478569 |
| H | 250.9368908000 | 186.0076258400 | 389.2333874900 |
| H | 249.7488626700 | 190.1330501900 | 397.0061029300 |
| C | 257.4180000000 | 180.5500000000 | 392.8130000000 |
| C | 257.7583052900 | 181.6745165622 | 391.8048797718 |
| C | 256.5036105820 | 182.2232539600 | 391.1577874638 |
| C | 255.7377740871 | 183.1874086074 | 391.8283142620 |
| C | 256.0329190718 | 181.7326879349 | 389.9341743887 |
| C | 254.5292720255 | 183.6442411755 | 391.3034987284 |
| C | 254.8266867439 | 182.1880058540 | 389.3984252012 |
| C | 254.0709737293 | 183.1420107075 | 390.0834788994 |
| H | 258.2701923416 | 182.4824466399 | 392.3413460514 |
| H | 258.4557733922 | 181.3054017283 | 391.0416692424 |
| H | 256.6175203336 | 180.9859446847 | 389.3980909188 |
| H | 256.0837007626 | 183.5824427126 | 392.7798767330 |
| H | 254.4786668138 | 181.8003072942 | 388.4428748780 |
| H | 253.9650646976 | 184.3931993629 | 391.8501642608 |
| H | 253.1323686574 | 183.4993090087 | 389.6666199919 |
| H | 258.2791107944 | 180.3609039524 | 393.4689259071 |
| H | 256.6123453200 | 180.8882626800 | 393.4305750100 |
| H | 257.1886380500 | 179.6229026800 | 392.3305234100 |
| C | 256.5880000000 | 185.6260000000 | 388.1370000000 |
| C | 256.6573261440 | 186.8748696699 | 389.0403755852 |
| C | 256.5328259409 | 186.4802819021 | 390.5178497770 |
| C | 257.9399155411 | 187.6820290204 | 388.7933630046 |
| H | 255.7974451016 | 187.5141324623 | 388.7982598320 |
| H | 257.9389464073 | 188.6002849355 | 389.3936372402 |
| H | 258.8326133000 | 187.1011728633 | 389.0656203223 |
| H | 258.0415267190 | 187.9714643359 | 387.7385554003 |
| H | 256.6076934967 | 187.3536181622 | 391.1688168423 |
| H | 257.3173426512 | 185.7625859232 | 390.7986645149 |
| H | 255.5691137595 | 186.0092033723 | 390.7233222941 |
| H | 255.6177060408 | 185.1365674095 | 388.3069131250 |
| H | 256.5957309900 | 185.9043155800 | 387.1038588300 |

|   |                |                |                |
|---|----------------|----------------|----------------|
| H | 257.3113663300 | 184.8932016100 | 388.4279427300 |
| C | 257.8290000000 | 191.8650000000 | 391.3050000000 |
| C | 258.2292772056 | 190.5367761409 | 391.9356879678 |
| C | 257.0097651635 | 189.7382224241 | 392.3663442495 |
| O | 256.0236303024 | 189.6443719626 | 391.6171114241 |
| N | 257.1242953923 | 189.1103154353 | 393.5493823236 |
| H | 258.9072130253 | 190.6868351600 | 392.7780862461 |
| H | 258.7596618346 | 189.9168889378 | 391.1998307655 |
| H | 257.6999921900 | 189.5364280321 | 394.2858267151 |
| H | 256.3475499506 | 188.5361619020 | 393.8659613008 |
| H | 257.1016730960 | 191.6680049156 | 390.5087978871 |
| H | 258.6802007700 | 192.3357676400 | 390.8592028700 |
| H | 257.3472596900 | 192.5084823500 | 392.0112271100 |
| C | 257.2040000000 | 182.8230000000 | 398.2410000000 |
| C | 256.2080000000 | 182.9730000000 | 399.3890000000 |
| O | 256.2421217398 | 183.9644378884 | 400.1170058582 |
| C | 256.9323487415 | 183.9021306138 | 397.1760710972 |
| C | 257.9531247326 | 183.9895144585 | 396.0558998401 |
| C | 259.2697442636 | 183.5285719605 | 396.1697549768 |
| C | 257.6011512951 | 184.6761832726 | 394.8815455286 |
| C | 260.2213647922 | 183.7872881435 | 395.1782064814 |
| C | 258.5415793632 | 184.9464075966 | 393.8899279159 |
| C | 259.8696623522 | 184.5242344898 | 394.0469307226 |
| O | 260.8400281079 | 184.8061074777 | 393.1212709325 |
| N | 255.2930000000 | 182.0110000000 | 399.5380000000 |
| C | 254.2780000000 | 182.0760000000 | 400.5800000000 |
| C | 253.0560000000 | 182.8560000000 | 400.1430000000 |
| O | 252.1771241367 | 183.1032846805 | 400.9715798381 |
| N | 253.0020000000 | 183.1650000000 | 398.8590000000 |
| C | 251.9230000000 | 184.0210000000 | 398.3810000000 |
| C | 252.4852560320 | 184.9950881947 | 397.3659798016 |
| C | 253.1551212119 | 186.1782476178 | 398.0352818019 |
| O | 252.8931257946 | 186.6049091558 | 399.1400628319 |
| O | 254.0084702903 | 186.7457772524 | 397.1889314426 |
| H | 256.8833689517 | 184.8719852198 | 397.6865599188 |
| H | 255.9350410573 | 183.7466850491 | 396.7404840466 |
| H | 256.5800891862 | 185.0331519511 | 394.7596165612 |
| H | 259.5840989900 | 182.9796151215 | 397.0547309337 |
| H | 258.2556016986 | 185.5072312118 | 393.0033187904 |
| H | 261.2529583784 | 183.4632148846 | 395.2848560126 |
| H | 260.8050165125 | 185.7578138726 | 392.9417024924 |
| H | 258.1949538024 | 182.9699921237 | 398.6833756310 |
| H | 254.6920547033 | 182.5899332429 | 401.4516545951 |
| H | 253.9719026528 | 181.0661721024 | 400.8690134198 |

|   |                |                |                |
|---|----------------|----------------|----------------|
| H | 255.3448337140 | 181.1876303026 | 398.9559796003 |
| H | 251.7098556623 | 185.4089213889 | 396.7158567946 |
| H | 253.1779798715 | 184.5206681992 | 396.6630040519 |
| H | 251.5450656140 | 184.5668319494 | 399.2502057186 |
| H | 253.7882371279 | 182.9794711389 | 398.2565079417 |
| H | 257.1746608800 | 181.8511415200 | 397.7943118400 |
| H | 251.0853859600 | 183.5187121800 | 397.9439534800 |
| C | 252.3740000000 | 194.4250000000 | 391.2270000000 |
| C | 251.4705588312 | 193.8928604187 | 392.3365280470 |
| O | 251.1673374787 | 194.9129065505 | 393.3268480152 |
| C | 252.0780520025 | 192.6564956781 | 392.9871121919 |
| H | 250.4876985432 | 193.6578325127 | 391.9104808844 |
| H | 251.3572432559 | 192.0452411300 | 393.5293768366 |
| H | 252.8691346379 | 192.9473436296 | 393.6912652642 |
| H | 252.5424516812 | 192.0150505476 | 392.2352623798 |
| H | 251.9820530387 | 195.0646966669 | 393.8282533954 |
| H | 252.2687228968 | 193.7432744431 | 390.3701630390 |
| H | 253.4126370200 | 194.3660192300 | 391.4773086400 |
| H | 252.0451243800 | 195.3825473200 | 390.8808151400 |
| C | 252.9230000000 | 197.6780000000 | 399.7280000000 |
| C | 251.9290000000 | 197.6090000000 | 398.5540000000 |
| O | 251.9911591782 | 196.6768966269 | 397.7263032139 |
| C | 252.7932362622 | 196.4109411433 | 400.5879013793 |
| O | 251.4208399494 | 196.3802754694 | 400.9894922803 |
| C | 253.7457290859 | 196.4433790486 | 401.7840073226 |
| N | 251.0510000000 | 198.6040000000 | 398.4340000000 |
| C | 250.2740000000 | 198.7450000000 | 397.2000000000 |
| C | 248.8681477210 | 198.1008591629 | 397.3167165891 |
| C | 248.3449161560 | 197.3830436658 | 396.0559536331 |
| C | 249.2501297974 | 196.2618526512 | 395.4926142109 |
| N | 249.8636581085 | 195.4750457093 | 396.5639825310 |
| C | 250.2072819840 | 194.1812803981 | 396.4882129475 |
| N | 249.8701351966 | 193.4100383702 | 395.4332941432 |
| N | 250.8626339451 | 193.6090903288 | 397.5111306653 |
| H | 253.0326554116 | 195.5376669294 | 399.9679422986 |
| H | 253.6876519837 | 195.5156130328 | 402.3619968620 |
| H | 253.4969814591 | 197.2816642910 | 402.4476783891 |
| H | 254.7834278864 | 196.5606073626 | 401.4483430264 |
| H | 251.2929166108 | 195.6154930591 | 401.5771924404 |
| H | 253.9217036189 | 197.7064489814 | 399.2704979743 |
| H | 248.9059993526 | 197.3749006944 | 398.1363160860 |
| H | 248.1339742728 | 198.8556850829 | 397.6225400036 |
| H | 247.3673489284 | 196.9556419108 | 396.3085715990 |
| H | 248.1714846664 | 198.1018632295 | 395.2442632819 |

|   |                |                |                |
|---|----------------|----------------|----------------|
| H | 250.0354337324 | 196.6730313470 | 394.8460077949 |
| H | 248.6481841883 | 195.6040964964 | 394.8610473596 |
| H | 250.5046647640 | 196.0095124451 | 397.1628046819 |
| H | 250.3362850814 | 192.4993186021 | 395.4481379946 |
| H | 249.9604569529 | 193.8889954331 | 394.5368815192 |
| H | 251.2724836091 | 194.1940861535 | 398.2303674603 |
| H | 251.3364948418 | 192.7251527677 | 397.2663164342 |
| H | 250.8575310235 | 198.2475607572 | 396.4205235050 |
| H | 251.0086564245 | 199.3101795181 | 399.1529077327 |
| H | 252.8225445600 | 198.5275036300 | 400.3707692400 |
| H | 250.2454665700 | 199.7826423700 | 396.9404154200 |
| C | 262.4400000000 | 198.8490000000 | 397.8030000000 |
| C | 261.3740000000 | 197.9840000000 | 397.1570000000 |
| O | 260.2158887336 | 197.9862367321 | 397.6140186430 |
| N | 261.7390000000 | 197.3100000000 | 396.0760000000 |
| C | 260.9410000000 | 196.2040000000 | 395.5760000000 |
| C | 261.7590000000 | 194.9410000000 | 395.8170000000 |
| O | 262.7396941213 | 194.7349061602 | 395.0907858432 |
| C | 260.5694103828 | 196.3427265120 | 394.0857239816 |
| C | 259.8164822508 | 195.0869258353 | 393.6150722366 |
| C | 259.7457124307 | 197.6151072217 | 393.8500696022 |
| N | 261.4030000000 | 194.1810000000 | 396.8510000000 |
| C | 262.2440000000 | 193.0760000000 | 397.2940000000 |
| C | 263.7130000000 | 193.5310000000 | 397.3750000000 |
| O | 263.9534781720 | 194.5991287282 | 397.9549791265 |
| C | 262.0524607262 | 191.8276337766 | 396.4430360402 |
| C | 260.6395796024 | 191.4189487611 | 396.3389216488 |
| N | 259.8000853802 | 191.2337630930 | 397.4149536980 |
| C | 259.9001021717 | 191.0991149619 | 395.2294678634 |
| C | 258.6152202479 | 190.7894945206 | 396.9233507856 |
| N | 258.6369569018 | 190.7000425665 | 395.5977257656 |
| N | 264.6520000000 | 192.7720000000 | 396.8360000000 |
| C | 266.0420000000 | 193.1750000000 | 397.0130000000 |
| C | 266.3610000000 | 194.3290000000 | 396.0730000000 |
| O | 267.3218914459 | 195.0716570257 | 396.3139040626 |
| C | 267.0173867815 | 191.9937793537 | 396.8321477115 |
| O | 267.0303483217 | 191.4474385788 | 395.5315263618 |
| N | 265.6370000000 | 194.4210000000 | 394.9660000000 |
| C | 265.9150000000 | 195.4720000000 | 393.9890000000 |
| C | 265.0014514182 | 195.2501424766 | 392.7614601873 |
| O | 265.1037178165 | 193.9380347589 | 392.2276191882 |
| C | 265.3617565839 | 196.2170113776 | 391.6365898348 |
| H | 262.9974566967 | 199.4242029929 | 397.0546934442 |
| H | 261.5109532258 | 196.4073964610 | 393.5247659125 |

|   |                |                |                |
|---|----------------|----------------|----------------|
| H | 258.8963191868 | 194.9363589035 | 394.1961636536 |
| H | 259.5319655372 | 195.1801869001 | 392.5610350148 |
| H | 260.4308587593 | 194.1873936542 | 393.7156747785 |
| H | 260.2755747354 | 198.5082510014 | 394.2003869801 |
| H | 258.7871856315 | 197.5644490440 | 394.3837160980 |
| H | 259.5284328772 | 197.7457322678 | 392.7839680878 |
| H | 260.0193370762 | 196.1908957114 | 396.1641488824 |
| H | 262.7287343896 | 197.2471529221 | 395.8563385599 |
| H | 262.6538332376 | 191.0081400115 | 396.8570676554 |
| H | 262.4122314823 | 192.0359339843 | 395.4345271078 |
| H | 260.2422485777 | 191.1309511153 | 394.2054989698 |
| H | 257.7941276323 | 190.5039159855 | 397.5553346957 |
| H | 261.9470232414 | 192.8686001997 | 398.3285277360 |
| H | 260.5675901158 | 194.3917123469 | 397.3971876798 |
| H | 266.7768917257 | 191.2375952914 | 397.5930815511 |
| H | 268.0196382741 | 192.3934028713 | 397.0305373249 |
| H | 266.2452571826 | 190.8731530687 | 395.4352658897 |
| H | 266.1639213966 | 193.5718316713 | 398.0253682645 |
| H | 264.4655450601 | 191.8684560226 | 396.4034480533 |
| H | 263.9686857828 | 195.4429965935 | 393.0920325083 |
| H | 265.3339809690 | 197.2584287292 | 391.9799765848 |
| H | 264.6637234938 | 196.1030236992 | 390.8011320339 |
| H | 266.3708790961 | 195.9984398009 | 391.2687114699 |
| H | 264.5707811521 | 193.3170545274 | 392.7544249194 |
| H | 266.9767000958 | 195.4464604853 | 393.7225851067 |
| H | 264.7710116851 | 193.9036044530 | 394.8942417380 |
| H | 260.0230648698 | 191.3776861238 | 398.4214041564 |
| H | 262.0018152300 | 199.5151592800 | 398.5165306000 |
| H | 263.1619819697 | 198.2001014813 | 398.3154387659 |
| H | 265.6768687500 | 196.4273183300 | 394.4079992700 |
| C | 259.4900000000 | 190.5140000000 | 408.0810000000 |
| C | 258.6590000000 | 191.0440000000 | 406.9170000000 |
| O | 258.5477995834 | 190.3902554502 | 405.8724266103 |
| C | 260.4673783862 | 189.4117651715 | 407.6374934507 |
| O | 259.8851633105 | 188.0953300716 | 407.6746542140 |
| N | 258.0660000000 | 192.2110000000 | 407.1150000000 |
| C | 257.1360000000 | 192.7790000000 | 406.1320000000 |
| C | 257.8810000000 | 193.5140000000 | 405.0200000000 |
| O | 259.1089710159 | 193.6894499594 | 405.1067641038 |
| C | 256.2666906447 | 193.7218996518 | 406.9864441360 |
| C | 257.2887652005 | 194.2804416206 | 407.9914969785 |
| C | 258.1905596218 | 193.0690494849 | 408.3076427442 |
| N | 257.1570000000 | 193.9310000000 | 403.9930000000 |
| C | 257.7580000000 | 194.5810000000 | 402.8280000000 |

|   |                |                |                |
|---|----------------|----------------|----------------|
| C | 257.0619412678 | 194.1065546519 | 401.5484803660 |
| C | 257.0997933584 | 192.6103681703 | 401.3545072713 |
| N | 256.9247673771 | 192.0778332167 | 400.0893542916 |
| C | 257.1977269605 | 191.5054752106 | 402.1842758536 |
| C | 256.9160028027 | 190.7255169512 | 400.2009685310 |
| N | 257.0784763092 | 190.3405322391 | 401.4536516505 |
| H | 261.3686537800 | 189.4312256159 | 408.2666463152 |
| H | 260.7618845350 | 189.5605563625 | 406.5967299112 |
| H | 259.6735072756 | 187.8748008401 | 408.5903121921 |
| H | 260.0685466495 | 191.3275134861 | 408.5346238469 |
| H | 255.4862972326 | 193.1380100065 | 407.4877533081 |
| H | 255.7754130032 | 194.4861431547 | 406.3798228694 |
| H | 256.8334609128 | 194.6997174480 | 408.8937677799 |
| H | 257.8872849404 | 195.0631242492 | 407.5132594702 |
| H | 257.8461368939 | 192.5318569256 | 409.2022485981 |
| H | 259.2320822807 | 193.3696801307 | 408.4671946857 |
| H | 256.5373707302 | 191.9770507941 | 405.6926391909 |
| H | 256.0187169201 | 194.4580909946 | 401.5488638829 |
| H | 257.5506130916 | 194.5887672687 | 400.6941284124 |
| H | 257.3747365309 | 191.4645970476 | 403.2479077555 |
| H | 256.7592053636 | 190.0634984418 | 399.3658173242 |
| H | 258.8052017941 | 194.2830215446 | 402.8020264403 |
| H | 256.1506600491 | 193.7333184750 | 403.9637464551 |
| H | 256.7721612981 | 192.5961285360 | 399.2087994830 |
| H | 257.7516639100 | 195.6461678100 | 402.9293775000 |
| H | 258.8826198600 | 190.1061772500 | 408.8618136600 |
| C | 262.5170000000 | 191.6280000000 | 404.4240000000 |
| C | 261.3953530484 | 190.7797449349 | 403.7565113678 |
| C | 261.0012987738 | 191.2797991570 | 402.3989504789 |
| N | 260.6617851563 | 192.6052399110 | 402.1866254104 |
| C | 260.8711364479 | 190.6824376588 | 401.1670203104 |
| C | 260.3291378829 | 192.7548533426 | 400.8717775533 |
| N | 260.4576800100 | 191.6102018784 | 400.2258878664 |
| H | 260.5092776452 | 190.7603709277 | 404.4068467109 |
| H | 261.7215553301 | 189.7400320730 | 403.6432115230 |
| H | 260.9758852582 | 189.6351610937 | 400.9150600218 |
| H | 260.0118712896 | 193.6863086886 | 400.4232729531 |
| H | 262.8727759838 | 191.1027978030 | 405.3222250569 |
| H | 260.5423697657 | 193.2815339884 | 402.9308269343 |
| H | 262.1236479100 | 192.5623940000 | 404.7661724500 |
| H | 263.3516533000 | 191.7181203700 | 403.7605754100 |
| C | 247.8970000000 | 194.0110000000 | 404.4930000000 |
| C | 248.2020000000 | 195.4880000000 | 404.7370000000 |
| O | 247.4323870188 | 196.1670588168 | 405.4238924635 |

|   |                |                |                |
|---|----------------|----------------|----------------|
| C | 246.7865555411 | 193.8135124541 | 403.4554223481 |
| O | 247.1873669470 | 194.2441651703 | 402.1604609944 |
| N | 249.3140000000 | 195.9620000000 | 404.1770000000 |
| C | 249.8020000000 | 197.3150000000 | 404.4650000000 |
| H | 245.9158774677 | 194.4200660931 | 403.7269505090 |
| H | 246.4767511415 | 192.7546085198 | 403.4497650318 |
| H | 248.0207045467 | 193.7994315062 | 401.9505731056 |
| H | 248.7957207889 | 193.4918193005 | 404.1224448986 |
| H | 249.0932124589 | 197.7733548690 | 405.1564785668 |
| H | 249.8829038859 | 195.3536697655 | 403.6007689715 |
| H | 250.7889284640 | 197.2674757661 | 404.9422059771 |
| H | 249.8831626000 | 197.9216560400 | 403.5873434200 |
| H | 247.6469519900 | 193.5211100300 | 405.4108146900 |
| C | 248.0800000000 | 189.8890000000 | 402.3840000000 |
| C | 249.0950000000 | 189.0790000000 | 403.1730000000 |
| O | 248.7627356488 | 188.1353509118 | 403.8903969263 |
| N | 250.3660000000 | 189.4520000000 | 403.0170000000 |
| C | 251.5130000000 | 188.7690000000 | 403.5980000000 |
| C | 251.3880000000 | 188.5090000000 | 405.0890000000 |
| O | 251.8727328418 | 187.5076430463 | 405.6377977734 |
| N | 250.8690000000 | 189.5060000000 | 405.7980000000 |
| C | 250.6660000000 | 189.4000000000 | 407.2250000000 |
| H | 248.3915343938 | 190.9344211866 | 402.2682227250 |
| H | 248.0297342510 | 189.4717465614 | 401.3688456728 |
| H | 252.3958919885 | 189.3951431465 | 403.4439163678 |
| H | 251.7008530230 | 187.8115907887 | 403.1114563680 |
| H | 250.5595017919 | 190.2550153073 | 402.4389490291 |
| H | 251.6135790812 | 189.3270464860 | 407.7691021814 |
| H | 250.1659619381 | 190.3094256343 | 407.5712876013 |
| H | 250.5026124389 | 190.3065925309 | 405.3044879062 |
| H | 247.0858872600 | 189.8764536600 | 402.7795786400 |
| H | 250.0641845600 | 188.5601268800 | 407.5030850800 |
| C | 252.9370000000 | 183.9060000000 | 405.2630000000 |
| C | 254.0167393604 | 184.9939497348 | 405.1477486288 |
| C | 254.0862746137 | 185.7411638707 | 403.8517868094 |
| N | 255.0596214015 | 186.7067617380 | 403.6193000000 |
| C | 253.2084862514 | 185.8691826566 | 402.8012304458 |
| C | 254.7239722847 | 187.3504424133 | 402.4587984739 |
| N | 253.6053679373 | 186.8832713187 | 401.9499755483 |
| H | 253.8515311847 | 185.7379652958 | 405.9335906240 |
| H | 254.9860706176 | 184.5124420020 | 405.3473969289 |
| H | 252.3192438927 | 185.2864090159 | 402.6011891044 |
| H | 255.3419986772 | 188.1356426135 | 402.0428320432 |
| H | 253.0431471179 | 183.2090139935 | 404.4194235718 |



|   |                |                |                |
|---|----------------|----------------|----------------|
| H | 255.9924379149 | 186.7929342289 | 404.0130234745 |
| H | 253.0716359200 | 183.3276933700 | 406.1531317900 |
| H | 251.9378550500 | 184.2828833500 | 405.1954107800 |
| C | 256.1350000000 | 184.2680000000 | 410.0930000000 |
| C | 254.8587217310 | 185.0503247791 | 409.7157422207 |
| C | 254.9046919305 | 185.7542095454 | 408.3386652311 |
| C | 255.8083462276 | 187.0042385206 | 408.2381296623 |
| N | 255.9292746312 | 187.5883700287 | 406.8867904575 |
| C | 255.2163995630 | 188.6484175456 | 406.4297464218 |
| N | 254.0040738551 | 188.9289930725 | 406.9853679674 |
| N | 255.7169163360 | 189.4221133453 | 405.4865573543 |
| H | 254.6340404300 | 185.7843850007 | 410.5031088857 |
| H | 254.0056657364 | 184.3604690677 | 409.6968658743 |
| H | 253.8854132242 | 186.0500236371 | 408.0665222115 |
| H | 255.2116206879 | 185.0220492984 | 407.5864814445 |
| H | 255.4325958714 | 187.7803681435 | 408.9156131999 |
| H | 256.8309924929 | 186.7591967764 | 408.5489263445 |
| H | 256.8026868766 | 187.4474504136 | 406.3856879531 |
| H | 253.3409685638 | 188.1508671129 | 406.9424119302 |
| H | 253.5892942370 | 189.7668010335 | 406.5711718856 |
| H | 255.0935640795 | 190.1149595642 | 405.0679881909 |
| H | 256.6212034541 | 189.1975474233 | 405.0534796832 |
| H | 256.9661500661 | 184.9874047881 | 410.1926717610 |
| H | 256.0745738400 | 183.8105880000 | 411.0584133500 |
| H | 256.4546022800 | 183.6142017200 | 409.3085880000 |
| C | 258.2840000000 | 182.3630000000 | 407.6130000000 |
| C | 259.4390083548 | 183.0619359479 | 406.8190035614 |
| C | 259.1654434965 | 183.3584450085 | 405.3353589623 |
| C | 258.1093950913 | 184.4080003728 | 404.9980256865 |
| O | 257.8595283235 | 184.7239203868 | 403.8472730204 |
| N | 257.4765073114 | 185.0250093745 | 406.0673039869 |
| H | 259.7294164943 | 183.9999690577 | 407.3089682010 |
| H | 260.3340467626 | 182.4313805570 | 406.8585750967 |
| H | 260.0854222589 | 183.7059556775 | 404.8505382891 |
| H | 258.8675281570 | 182.4459783563 | 404.8023940364 |
| H | 257.4408808889 | 184.5413148557 | 406.9523773035 |
| H | 256.6130320571 | 185.4804429857 | 405.8051878341 |
| H | 258.6805740576 | 181.4466514912 | 408.0725380269 |
| H | 257.9764082900 | 182.9526099700 | 408.4512406800 |
| H | 257.4941573700 | 182.0178150200 | 406.9790473600 |
| C | 266.7500000000 | 184.8280000000 | 405.9900000000 |
| C | 266.8624201327 | 184.5565845563 | 404.4810867360 |
| C | 266.2088643364 | 185.6571182316 | 403.6234466217 |
| C | 264.7074513262 | 185.8144808849 | 403.8521564938 |

|    |                |                |                |
|----|----------------|----------------|----------------|
| O  | 264.2054759754 | 185.6986395892 | 404.9826081904 |
| N  | 263.9593636456 | 186.1093852686 | 402.7736889866 |
| H  | 266.4143821159 | 183.5854572430 | 404.2316211337 |
| H  | 267.9188875740 | 184.4936807050 | 404.1882490164 |
| H  | 266.6682418804 | 186.6264219765 | 403.8666359092 |
| H  | 266.4062207043 | 185.4804609883 | 402.5591804970 |
| H  | 262.9545790456 | 186.2312207808 | 402.9492830519 |
| H  | 264.3581830423 | 186.2647668559 | 401.8595577967 |
| H  | 265.7194996240 | 184.6827375538 | 406.3149252819 |
| H  | 267.3694889400 | 184.1783434200 | 406.5723055700 |
| H  | 266.9695248200 | 185.8595464200 | 406.1706124000 |
| C  | 265.3830000000 | 185.7480000000 | 399.2270000000 |
| C  | 264.4469856405 | 186.2421499445 | 398.1046906858 |
| C  | 264.8477981531 | 187.6563186323 | 397.6306070754 |
| C  | 264.5459110578 | 188.8137891703 | 398.5835985421 |
| O  | 265.3261457065 | 189.7463582365 | 398.7594485649 |
| N  | 263.3421686948 | 188.7690508291 | 399.2357917983 |
| H  | 263.3970091639 | 186.2212613509 | 398.4228558999 |
| H  | 264.5087811297 | 185.5656893190 | 397.2438254696 |
| H  | 265.9246004147 | 187.7033139496 | 397.4346528987 |
| H  | 264.3586174272 | 187.8911812837 | 396.6830275910 |
| H  | 263.0859992356 | 189.5852160518 | 399.7744360434 |
| H  | 262.6198608181 | 188.0849063117 | 399.0542047625 |
| H  | 265.3565431340 | 186.4689490284 | 400.0599560148 |
| H  | 266.3824140000 | 185.7920594000 | 398.8473548600 |
| H  | 265.1501260700 | 184.7833374000 | 399.6271197500 |
| C  | 264.6900000000 | 186.5740000000 | 390.9080000000 |
| C  | 266.0210000000 | 186.4580000000 | 391.6570000000 |
| O  | 266.9664674224 | 185.8537615159 | 391.1301520182 |
| N  | 266.1040000000 | 187.0410000000 | 392.8470000000 |
| C  | 267.3460000000 | 187.0190000000 | 393.6280000000 |
| H  | 264.0463961084 | 187.3694450346 | 391.2931955511 |
| H  | 264.1486993680 | 185.6252281309 | 390.9885477351 |
| H  | 268.1849256659 | 186.8783305300 | 392.9449559921 |
| H  | 265.2779639031 | 187.4562107623 | 393.2604835234 |
| H  | 267.4464641743 | 187.9556170042 | 394.1839949377 |
| H  | 264.9291132400 | 186.7390321500 | 389.8781994100 |
| H  | 267.2858396200 | 186.1921445100 | 394.3044545300 |
| O  | 253.6859776606 | 186.7137963228 | 392.8177258468 |
| O  | 255.4053079575 | 187.7946728443 | 395.3061663046 |
| O  | 253.7971263724 | 184.7664762346 | 394.3670338486 |
| Cl | 253.4814677554 | 186.2662810913 | 394.2639941995 |
| O  | 251.9629807066 | 186.4825426672 | 394.6039937543 |

## The Mo-chlorate complex optimized using the bigger model

|    |                |                |                |
|----|----------------|----------------|----------------|
| Mo | 255.3278338966 | 188.1350285191 | 397.0515443574 |
| P  | 253.3435476764 | 192.4662396389 | 404.4910672627 |
| O  | 254.3292105721 | 193.4727806103 | 403.9690632636 |
| O  | 253.7514648850 | 191.1981066740 | 405.1774979393 |
| O  | 252.3900101184 | 191.9276448191 | 403.1427369946 |
| O  | 252.9066774559 | 193.3102628800 | 401.0537383504 |
| P  | 251.7598967747 | 192.8950721181 | 402.0548015183 |
| O  | 251.0190063651 | 194.0802725304 | 402.5890798649 |
| O  | 250.7500510943 | 191.9193878546 | 401.2423852763 |
| O  | 252.1486716527 | 193.1530915491 | 405.3543475252 |
| C  | 253.7714845979 | 192.2962047454 | 400.4341047243 |
| C  | 253.4394310697 | 192.2609127443 | 398.9488464617 |
| O  | 253.6696357876 | 193.6054043472 | 398.4951374357 |
| C  | 254.1689582899 | 191.1868093788 | 398.1788402027 |
| S  | 253.9349092942 | 189.5066466661 | 398.6316938382 |
| C  | 254.9003439722 | 191.4984609361 | 397.0879431871 |
| S  | 255.5987258138 | 190.2706227707 | 396.0780070576 |
| C  | 255.2389272313 | 192.9175868028 | 396.7368320881 |
| N  | 256.4558516761 | 193.3153606261 | 397.4653728101 |
| C  | 256.6730837665 | 194.7048319660 | 397.5784191771 |
| C  | 257.9548560095 | 195.1437070969 | 397.9959458736 |
| O  | 258.9375207118 | 194.4083411845 | 398.2359285094 |
| N  | 258.0649126302 | 196.5286126724 | 398.1202267621 |
| C  | 257.0445958689 | 197.3840817975 | 397.8418992551 |
| N  | 257.3346896404 | 198.7257284495 | 397.9330341699 |
| N  | 255.8282152422 | 196.9821568084 | 397.5379766393 |
| C  | 255.6574782622 | 195.6326325745 | 397.3971756109 |
| N  | 254.4048558847 | 195.2099832441 | 396.9941971871 |
| C  | 254.0717014547 | 193.8208976839 | 397.1284495326 |
| P  | 262.3967838756 | 187.9520246137 | 394.5372920400 |
| O  | 262.4936002939 | 189.5126596881 | 394.1696002172 |
| O  | 261.1106267919 | 187.5400425198 | 393.6228212011 |
| O  | 263.5984990371 | 187.1275115352 | 394.2972376240 |
| O  | 261.8923187962 | 187.7859709746 | 396.0566857884 |
| C  | 260.5576531493 | 188.1539200185 | 396.4879768898 |
| C  | 260.0424232731 | 187.1811170689 | 397.5443659328 |
| O  | 260.6473517028 | 187.5460228836 | 398.7981484105 |
| C  | 258.5365716147 | 187.2581076025 | 397.7279665706 |
| S  | 257.5458888671 | 187.6897123644 | 396.3670593236 |
| C  | 257.9426518646 | 187.0556245947 | 398.9326637407 |
| S  | 256.1929459186 | 187.2456562705 | 399.0735942693 |
| C  | 258.7112799417 | 186.6372153067 | 400.1668918155 |

|   |                |                |                |
|---|----------------|----------------|----------------|
| N | 258.2961142330 | 187.3928891697 | 401.3492441974 |
| C | 259.1660081086 | 187.3114831002 | 402.4557466075 |
| C | 258.7087137488 | 187.3787900471 | 403.8004962924 |
| O | 257.5177755389 | 187.4025962233 | 404.2275217013 |
| N | 259.7258577769 | 187.4398714843 | 404.7633497317 |
| C | 261.0530766681 | 187.3353147904 | 404.4761603797 |
| N | 261.9435298785 | 187.4181397638 | 405.4918204038 |
| N | 261.4854674030 | 187.1972251131 | 403.2341901172 |
| C | 260.5480436116 | 187.1961574519 | 402.2548017170 |
| N | 261.0342385321 | 187.0265456957 | 400.9900908910 |
| C | 260.2545500822 | 186.6601462038 | 399.8397178275 |
| P | 263.9360938079 | 190.4301765276 | 394.0134845133 |
| O | 263.5341039353 | 191.7842915375 | 393.5029729277 |
| O | 264.6552301016 | 190.2271394250 | 395.3228191148 |
| O | 264.6723676267 | 189.6066800457 | 392.8170008327 |
| H | 253.6357716825 | 191.3161272397 | 400.9023975748 |
| H | 254.7903902189 | 192.6261506908 | 400.6029483859 |
| H | 257.2811700657 | 192.8398634412 | 397.0964880898 |
| H | 259.0174128725 | 196.9040701187 | 398.1888670224 |
| H | 256.6740183961 | 199.3102568369 | 397.4412841287 |
| H | 258.3143359322 | 198.9610663154 | 397.8043642520 |
| H | 253.6443303913 | 195.8592690420 | 397.1881304645 |
| H | 260.5999668683 | 189.1509225784 | 396.9177151675 |
| H | 259.8784969391 | 188.1517596028 | 395.6374592674 |
| H | 260.3516478447 | 186.1612570238 | 397.2652649121 |
| H | 258.4677669807 | 185.5787547163 | 400.3631337694 |
| H | 257.9832867206 | 188.3557838403 | 401.1838732243 |
| H | 261.5896090820 | 187.1935674081 | 406.4112932115 |
| H | 262.9055605229 | 187.1198347293 | 405.2746014285 |
| H | 262.0388435446 | 187.0675827200 | 400.8716345930 |
| H | 260.5313968429 | 185.6396849291 | 399.5100156415 |
| H | 259.4398118207 | 187.6425062330 | 405.7203831587 |
| H | 260.6029023110 | 188.3082322468 | 393.3243722455 |
| H | 251.1922204315 | 191.3105351987 | 400.6265498384 |
| H | 264.7185296253 | 190.1810995260 | 392.0406653862 |
| H | 251.7858083115 | 193.9163062079 | 404.8765059348 |
| H | 252.3554495789 | 192.0499976452 | 398.8624833011 |
| H | 255.3785241817 | 193.0208374128 | 395.6497697834 |
| H | 253.2377007109 | 193.5853876516 | 396.4602408685 |
| C | 253.8150000000 | 181.3190000000 | 393.8550000000 |
| C | 252.5635933948 | 180.9619200096 | 393.0411455483 |
| C | 251.2924136426 | 181.5392567415 | 393.6346272352 |
| C | 251.1883209024 | 182.9124939455 | 393.9071696204 |
| C | 250.1850407162 | 180.7357139369 | 393.9278908511 |

|   |                |                |                |
|---|----------------|----------------|----------------|
| C | 250.0170084678 | 183.4616336784 | 394.4232713056 |
| C | 248.9991086997 | 181.2743865084 | 394.4310701798 |
| C | 248.9051576147 | 182.6457230784 | 394.6590548898 |
| O | 247.7139761836 | 183.1529328453 | 395.1236257006 |
| H | 252.4651771627 | 179.8712066598 | 392.9573858822 |
| H | 252.6993286298 | 181.3411976425 | 392.0189715138 |
| H | 250.2424658789 | 179.6641162861 | 393.7420414949 |
| H | 252.0351784267 | 183.5657553153 | 393.7114693535 |
| H | 248.1320356955 | 180.6507692574 | 394.6307564533 |
| H | 249.9486125264 | 184.5284168740 | 394.6156763396 |
| H | 247.5568126365 | 184.0015698219 | 394.6837448426 |
| H | 253.9448728155 | 182.4055731306 | 393.9064819374 |
| H | 254.7073920000 | 180.9467450000 | 393.3967840000 |
| H | 253.7456650000 | 180.9723260000 | 394.8649060000 |
| C | 250.7220000000 | 189.7720000000 | 397.2660000000 |
| C | 251.7060000000 | 190.2220000000 | 396.2070000000 |
| O | 251.8460855099 | 191.4536789285 | 396.0043258419 |
| C | 250.5334320536 | 188.2793908903 | 397.6265878490 |
| C | 249.4880064492 | 187.6392645514 | 396.6773338319 |
| C | 250.1692513383 | 188.1582049743 | 399.1147987371 |
| C | 248.9594543960 | 186.2568851019 | 397.0843719751 |
| N | 252.1860000000 | 189.2760000000 | 395.4020000000 |
| C | 253.0110000000 | 189.6170000000 | 394.2560000000 |
| C | 252.3720000000 | 189.5290000000 | 392.8820000000 |
| O | 251.1337542020 | 189.4649005166 | 392.7382464083 |
| N | 253.2200000000 | 189.6570000000 | 391.8670000000 |
| C | 252.7880000000 | 189.7520000000 | 390.4780000000 |
| C | 252.6390000000 | 188.3760000000 | 389.8630000000 |
| O | 253.3225173485 | 188.0320722934 | 388.8944469139 |
| N | 251.7410000000 | 187.5940000000 | 390.4440000000 |
| C | 251.5650000000 | 186.1910000000 | 390.0800000000 |
| C | 251.1683527749 | 185.3603629361 | 391.3215764107 |
| C | 249.8981715310 | 185.7546619615 | 392.0276564188 |
| C | 249.7700239885 | 186.7604511115 | 392.9567451116 |
| C | 248.6086729847 | 185.1154488867 | 391.9520748070 |
| N | 248.4734935754 | 186.7988334616 | 393.4434091607 |
| C | 247.7372952018 | 185.7923747880 | 392.8572446605 |
| C | 248.1222455641 | 183.9996933329 | 391.2543545765 |
| C | 246.4115833211 | 185.3905234103 | 393.0596750058 |
| C | 246.8105381674 | 183.5902444251 | 391.4600565801 |
| C | 245.9633524384 | 184.2790698333 | 392.3501786687 |
| H | 251.4867731752 | 187.7642036450 | 397.5118892238 |
| H | 249.2508463242 | 188.7174084921 | 399.3488036300 |
| H | 250.9919492328 | 188.5329550742 | 399.7330114857 |

|   |                |                |                |
|---|----------------|----------------|----------------|
| H | 250.0234420331 | 187.1176926872 | 399.4140004712 |
| H | 248.6271841710 | 188.3238387199 | 396.5926444905 |
| H | 249.9308716450 | 187.5850903348 | 395.6746290845 |
| H | 248.3104395051 | 186.3176487404 | 397.9642409383 |
| H | 248.3772036029 | 185.7991285902 | 396.2764391776 |
| H | 249.7661780909 | 185.5621722741 | 397.3290826731 |
| H | 251.0143234639 | 190.3194898419 | 398.1709467884 |
| H | 253.3475240312 | 190.6455658069 | 394.3923828407 |
| H | 253.9134481071 | 189.0096531866 | 394.2710669606 |
| H | 252.2354934217 | 188.3287653699 | 395.7614102992 |
| H | 251.8380090879 | 190.2998194681 | 390.4426058709 |
| H | 254.2416448566 | 189.5553629758 | 391.9915333739 |
| H | 252.0005305671 | 185.4471207208 | 392.0273258201 |
| H | 251.1089330924 | 184.3041961653 | 391.0319806177 |
| H | 250.4890966891 | 187.4914349381 | 393.2957512629 |
| H | 248.1437928306 | 187.4532843058 | 394.1344314745 |
| H | 248.7764068192 | 183.4508653637 | 390.5817983828 |
| H | 246.4326426929 | 182.7141077003 | 390.9393467997 |
| H | 245.7621750816 | 185.9185544606 | 393.7538640261 |
| H | 244.9455511258 | 183.9282892177 | 392.4996059276 |
| H | 252.5550950117 | 185.8433079035 | 389.7580291914 |
| H | 251.1664289548 | 187.9879656016 | 391.1820958367 |
| H | 253.5574980297 | 190.2825925813 | 389.9161495367 |
| H | 250.9368910000 | 186.0076260000 | 389.2333870000 |
| H | 249.7488630000 | 190.1330500000 | 397.0061030000 |
| C | 257.4180000000 | 180.5500000000 | 392.8130000000 |
| C | 257.7617099699 | 181.6817782123 | 391.8153783433 |
| C | 256.4984823997 | 182.2301500237 | 391.1886449033 |
| C | 255.7844411609 | 183.2513711603 | 391.8303856779 |
| C | 255.9581349463 | 181.6637950605 | 390.0274019811 |
| C | 254.5570163168 | 183.6875829210 | 391.3330618694 |
| C | 254.7321366524 | 182.0988747848 | 389.5229344883 |
| C | 254.0255200748 | 183.1100417834 | 390.1782215609 |
| H | 258.2770473671 | 182.4837809580 | 392.3574424802 |
| H | 258.4523419864 | 181.3176725272 | 391.0437581367 |
| H | 256.5042078784 | 180.8713543828 | 389.5171046717 |
| H | 256.1800196076 | 183.7091837853 | 392.7342950673 |
| H | 254.3298818525 | 181.6513144488 | 388.6161361725 |
| H | 254.0370696733 | 184.4889782835 | 391.8469697026 |
| H | 253.0717443868 | 183.4533427278 | 389.7847433879 |
| H | 258.2762774149 | 180.3571225111 | 393.4712520696 |
| H | 256.6123450000 | 180.8882630000 | 393.4305750000 |
| H | 257.1886380000 | 179.6229030000 | 392.3305230000 |
| C | 256.5880000000 | 185.6260000000 | 388.1370000000 |

|   |                |                |                |
|---|----------------|----------------|----------------|
| C | 256.6669305720 | 186.8821193891 | 389.0303769045 |
| C | 256.5225674609 | 186.5101241849 | 390.5103867836 |
| C | 257.9614868232 | 187.6710864175 | 388.7873805979 |
| H | 255.8178550296 | 187.5297602479 | 388.7726076227 |
| H | 257.9651785643 | 188.5954568919 | 389.3779787793 |
| H | 258.8445353126 | 187.0831482997 | 389.0754471834 |
| H | 258.0780633183 | 187.9484703088 | 387.7310213474 |
| H | 256.5749369367 | 187.3929668725 | 391.1493219912 |
| H | 257.3081581425 | 185.8064101174 | 390.8216038253 |
| H | 255.5599867892 | 186.0332934096 | 390.7048191516 |
| H | 255.6154414088 | 185.1420327084 | 388.3106063337 |
| H | 256.5957310000 | 185.9043160000 | 387.1038590000 |
| H | 257.3113660000 | 184.8932020000 | 388.4279430000 |
| C | 257.8290000000 | 191.8650000000 | 391.3050000000 |
| C | 258.1912094330 | 190.5231945433 | 391.9274661403 |
| C | 256.9458612704 | 189.7398021317 | 392.3193107753 |
| O | 255.9563188705 | 189.7100097931 | 391.5631000593 |
| N | 257.0433023930 | 189.0529771295 | 393.4643615975 |
| H | 258.8431214030 | 190.6484335098 | 392.7932715562 |
| H | 258.7283565800 | 189.9028489896 | 391.1958487625 |
| H | 257.6675297707 | 189.4115925539 | 394.1909107340 |
| H | 256.2677273385 | 188.4639578367 | 393.7662442528 |
| H | 257.1015509819 | 191.6865717487 | 390.5035767777 |
| H | 258.6802010000 | 192.3357680000 | 390.8592030000 |
| H | 257.3472600000 | 192.5084820000 | 392.0112270000 |
| C | 257.2040000000 | 182.8230000000 | 398.2410000000 |
| C | 256.2080000000 | 182.9730000000 | 399.3890000000 |
| O | 256.2894022204 | 183.9253973917 | 400.1668080560 |
| C | 257.0281171353 | 183.9067693354 | 397.1660052247 |
| C | 258.1711451577 | 183.9833002023 | 396.1662305951 |
| C | 259.4557697147 | 183.4835163559 | 396.4142698018 |
| C | 257.9710998308 | 184.6949142450 | 394.9724658993 |
| C | 260.5165005073 | 183.7187382739 | 395.5357582347 |
| C | 259.0189162666 | 184.9384057892 | 394.0882221177 |
| C | 260.3083883809 | 184.4685289591 | 394.3777504250 |
| O | 261.3782957814 | 184.7011576513 | 393.5611979946 |
| N | 255.2930000000 | 182.0110000000 | 399.5380000000 |
| C | 254.2780000000 | 182.0760000000 | 400.5800000000 |
| C | 253.0560000000 | 182.8560000000 | 400.1430000000 |
| O | 252.1616594241 | 183.0761867666 | 400.9602125268 |
| N | 253.0020000000 | 183.1650000000 | 398.8590000000 |
| C | 251.9230000000 | 184.0210000000 | 398.3810000000 |
| C | 252.4608408591 | 184.9475077614 | 397.2970995874 |
| C | 253.1020814240 | 186.1974454613 | 397.8744650658 |

|   |                |                |                |
|---|----------------|----------------|----------------|
| O | 253.0034946798 | 186.5281102049 | 399.0388032435 |
| O | 253.7002518856 | 186.8906133824 | 396.9216110569 |
| H | 256.9334149976 | 184.8780271809 | 397.6640126312 |
| H | 256.0831131169 | 183.7562245004 | 396.6264354706 |
| H | 256.9840076711 | 185.0895910650 | 394.7535671180 |
| H | 259.6617772286 | 182.9164637532 | 397.3185650623 |
| H | 258.8451576473 | 185.5194124664 | 393.1850963792 |
| H | 261.5188810347 | 183.3576316445 | 395.7483675899 |
| H | 261.2565434142 | 185.5618492795 | 393.1325827783 |
| H | 258.1824608964 | 182.9380570219 | 398.7191849287 |
| H | 254.6954276770 | 182.5891091691 | 401.4498111236 |
| H | 253.9694189788 | 181.0672827715 | 400.8700190877 |
| H | 255.2814880257 | 181.2354408986 | 398.8916260924 |
| H | 251.6579483162 | 185.2727737636 | 396.6241293353 |
| H | 253.1819971612 | 184.4465131409 | 396.6379996293 |
| H | 251.5669161766 | 184.6062640798 | 399.2327200633 |
| H | 253.8201792328 | 183.0555705954 | 398.2810613964 |
| H | 257.1746610000 | 181.8511420000 | 397.7943120000 |
| H | 251.0853860000 | 183.5187120000 | 397.9439530000 |
| C | 252.3740000000 | 194.4250000000 | 391.2270000000 |
| C | 251.5047591166 | 193.9013434258 | 392.3658822353 |
| O | 251.1880082086 | 194.9397569566 | 393.3284619313 |
| C | 252.1747265032 | 192.7119677940 | 393.0373262289 |
| H | 250.5229461752 | 193.6137443355 | 391.9687324666 |
| H | 251.5186519451 | 192.1535202410 | 393.7010975902 |
| H | 253.0364822573 | 193.0493955658 | 393.6300902835 |
| H | 252.5603561249 | 192.0184068667 | 392.2877112361 |
| H | 251.9920132761 | 195.1045920329 | 393.8426232474 |
| H | 252.2600649967 | 193.7359943940 | 390.3774444215 |
| H | 253.4126370000 | 194.3660190000 | 391.4773090000 |
| H | 252.0451240000 | 195.3825470000 | 390.8808150000 |
| C | 252.9230000000 | 197.6780000000 | 399.7280000000 |
| C | 251.9290000000 | 197.6090000000 | 398.5540000000 |
| O | 251.9939806400 | 196.6780766898 | 397.7257462416 |
| C | 252.7978124272 | 196.4111379927 | 400.5852917934 |
| O | 251.4363686610 | 196.4001273061 | 401.0212653392 |
| C | 253.7793308675 | 196.4274906690 | 401.7581231569 |
| N | 251.0510000000 | 198.6040000000 | 398.4340000000 |
| C | 250.2740000000 | 198.7450000000 | 397.2000000000 |
| C | 248.8837399353 | 198.0714680801 | 397.2995373960 |
| C | 248.3531104956 | 197.4169079235 | 396.0068774590 |
| C | 249.2734445502 | 196.3534285638 | 395.3531548515 |
| N | 249.9771969060 | 195.5500149904 | 396.3499725523 |
| C | 250.1926908497 | 194.2326587709 | 396.3404122320 |



|   |                |                |                |
|---|----------------|----------------|----------------|
| N | 249.7217242943 | 193.4423074671 | 395.3441184905 |
| N | 250.8511581061 | 193.6603590613 | 397.3577820532 |
| H | 253.0106807400 | 195.5400999472 | 399.9523679481 |
| H | 253.7086983383 | 195.5074003366 | 402.3464869195 |
| H | 253.5700269835 | 197.2778703109 | 402.4196733705 |
| H | 254.8119436070 | 196.5119289768 | 401.3981332561 |
| H | 251.2899706129 | 195.5877057869 | 401.5371434059 |
| H | 253.9189292041 | 197.7074243258 | 399.2644069111 |
| H | 248.9533315011 | 197.2985172768 | 398.0727246860 |
| H | 248.1407173861 | 198.7915399609 | 397.6624601808 |
| H | 247.3928450455 | 196.9491195402 | 396.2547268141 |
| H | 248.1412796077 | 198.1787315058 | 395.2449310471 |
| H | 250.0120489214 | 196.8207978504 | 394.6909860729 |
| H | 248.6690081943 | 195.7011152815 | 394.7192064794 |
| H | 250.6293330587 | 196.0663230372 | 396.9578803255 |
| H | 250.1008106541 | 192.4970428287 | 395.3848905886 |
| H | 249.8446826783 | 193.8744259511 | 394.4300303959 |
| H | 251.3175856632 | 194.2383699999 | 398.0490267717 |
| H | 251.2756533791 | 192.7469907469 | 397.1354323427 |
| H | 250.8698610931 | 198.2624035381 | 396.4194807432 |
| H | 251.0083161381 | 199.3091697095 | 399.1538536497 |
| H | 252.8225450000 | 198.5275040000 | 400.3707690000 |
| H | 250.2454670000 | 199.7826420000 | 396.9404150000 |
| C | 262.4400000000 | 198.8490000000 | 397.8030000000 |
| C | 261.3740000000 | 197.9840000000 | 397.1570000000 |
| O | 260.2216588244 | 197.9874307780 | 397.6286566518 |
| N | 261.7390000000 | 197.3100000000 | 396.0760000000 |
| C | 260.9410000000 | 196.2040000000 | 395.5760000000 |
| C | 261.7590000000 | 194.9410000000 | 395.8170000000 |
| O | 262.7449837872 | 194.7432404007 | 395.0956376091 |
| C | 260.5508472772 | 196.3401328073 | 394.0915610289 |
| C | 259.7469326146 | 195.1031410464 | 393.6585962095 |
| C | 259.7622252976 | 197.6346716266 | 393.8545704616 |
| N | 261.4030000000 | 194.1810000000 | 396.8510000000 |
| C | 262.2440000000 | 193.0760000000 | 397.2940000000 |
| C | 263.7130000000 | 193.5310000000 | 397.3750000000 |
| O | 263.9557124116 | 194.5965376623 | 397.9591126824 |
| C | 262.0631811009 | 191.8450145689 | 396.4126294127 |
| C | 260.6476975597 | 191.4693155748 | 396.2571806298 |
| N | 259.7792230229 | 191.2719701002 | 397.3090131856 |
| C | 259.9312220372 | 191.1879039615 | 395.1228527589 |
| C | 258.5988743293 | 190.8592825928 | 396.7731537024 |
| N | 258.6536675954 | 190.7992626653 | 395.4483268309 |
| N | 264.6520000000 | 192.7720000000 | 396.8360000000 |

|   |                |                |                |
|---|----------------|----------------|----------------|
| C | 266.0420000000 | 193.1750000000 | 397.0130000000 |
| C | 266.3610000000 | 194.3290000000 | 396.0730000000 |
| O | 267.3188485403 | 195.0749920379 | 396.3157175237 |
| C | 267.0286051858 | 191.9997721598 | 396.8630635039 |
| O | 267.1040404636 | 191.4561627340 | 395.5641974127 |
| N | 265.6370000000 | 194.4210000000 | 394.9660000000 |
| C | 265.9150000000 | 195.4720000000 | 393.9890000000 |
| C | 265.0111104634 | 195.2493043497 | 392.7559420109 |
| O | 265.1412790817 | 193.9465960864 | 392.2080644030 |
| C | 265.3583903986 | 196.2374486995 | 391.6452159283 |
| H | 263.0009388160 | 199.4227517276 | 397.0561355757 |
| H | 261.4829075001 | 196.3659782396 | 393.5120046665 |
| H | 258.8264825960 | 195.0046397351 | 394.2499188654 |
| H | 259.4584505434 | 195.1778238655 | 392.6044406573 |
| H | 260.3246007679 | 194.1824075924 | 393.7815274991 |
| H | 260.3345485325 | 198.5173078670 | 394.1621684849 |
| H | 258.8231840377 | 197.6300125917 | 394.4245306841 |
| H | 259.5092838975 | 197.7475136597 | 392.7942796074 |
| H | 260.0228051371 | 196.1879205529 | 396.1681086510 |
| H | 262.7288420674 | 197.2481352307 | 395.8568128144 |
| H | 262.6379701815 | 191.0065147081 | 396.8263695037 |
| H | 262.4538406351 | 192.0717911327 | 395.4197934771 |
| H | 260.3016227859 | 191.2358095672 | 394.1084179527 |
| H | 257.7552978743 | 190.5647858197 | 397.3701252414 |
| H | 261.9410461536 | 192.8512263666 | 398.3222618032 |
| H | 260.5498973449 | 194.3781256675 | 397.3759594277 |
| H | 266.7655197880 | 191.2391582875 | 397.6147992974 |
| H | 268.0190946762 | 192.4040873407 | 397.1052315149 |
| H | 266.3178673318 | 190.8910575295 | 395.4329810810 |
| H | 266.1541299362 | 193.5816537228 | 398.0229527164 |
| H | 264.4687793179 | 191.8758640037 | 396.3862472666 |
| H | 263.9733584494 | 195.4196390091 | 393.0840135067 |
| H | 265.2998490091 | 197.2743089976 | 391.9983298233 |
| H | 264.6720243266 | 196.1134594677 | 390.8015227077 |
| H | 266.3765287610 | 196.0489156345 | 391.2854140180 |
| H | 264.6192837782 | 193.3108349331 | 392.7310770981 |
| H | 266.9778965839 | 195.4485606819 | 393.7262839606 |
| H | 264.7768609135 | 193.8945867455 | 394.8855615751 |
| H | 259.9902778795 | 191.3975947262 | 398.3160329384 |
| H | 262.0018150000 | 199.5151590000 | 398.5165310000 |
| H | 263.1589992723 | 198.1979183243 | 398.3169720835 |
| H | 265.6768690000 | 196.4273180000 | 394.4079990000 |
| C | 259.4900000000 | 190.5140000000 | 408.0810000000 |
| C | 258.6590000000 | 191.0440000000 | 406.9170000000 |

|   |                |                |                |
|---|----------------|----------------|----------------|
| O | 258.5400436772 | 190.3892314467 | 405.8726575877 |
| C | 260.4812549566 | 189.4252635252 | 407.6491976064 |
| O | 259.8843101669 | 188.1203624347 | 407.5601549382 |
| N | 258.0660000000 | 192.2110000000 | 407.1150000000 |
| C | 257.1360000000 | 192.7790000000 | 406.1320000000 |
| C | 257.8810000000 | 193.5140000000 | 405.0200000000 |
| O | 259.1074852770 | 193.6947720115 | 405.1086287647 |
| C | 256.2739006863 | 193.7286325734 | 406.9867085720 |
| C | 257.3044399429 | 194.2903699664 | 407.9816469149 |
| C | 258.2030269682 | 193.0772023564 | 408.3000572919 |
| N | 257.1570000000 | 193.9310000000 | 403.9930000000 |
| C | 257.7580000000 | 194.5810000000 | 402.8280000000 |
| C | 257.0920859252 | 194.0970895825 | 401.5322626598 |
| C | 257.2062384245 | 192.6080633302 | 401.2982769777 |
| N | 256.9678748228 | 192.0864301346 | 400.0362920306 |
| C | 257.4681545785 | 191.5024480147 | 402.0860503337 |
| C | 257.0885908734 | 190.7338120324 | 400.1114839682 |
| N | 257.3941826153 | 190.3447685870 | 401.3356574886 |
| H | 261.3270474013 | 189.3935829914 | 408.3516974172 |
| H | 260.8744026714 | 189.6272027411 | 406.6513170266 |
| H | 259.5499085824 | 187.8682093715 | 408.4295665918 |
| H | 260.0631625881 | 191.3300413002 | 408.5377340711 |
| H | 255.4973695912 | 193.1497319570 | 407.4999445229 |
| H | 255.7789446054 | 194.4895328124 | 406.3789179351 |
| H | 256.8563589322 | 194.7176749007 | 408.8838581430 |
| H | 257.9030271983 | 195.0670787287 | 407.4940794652 |
| H | 257.8629344744 | 192.5483016944 | 409.2013018179 |
| H | 259.2468565255 | 193.3747505269 | 408.4498730259 |
| H | 256.5355289617 | 191.9765056546 | 405.6931547568 |
| H | 256.0332802901 | 194.3997044577 | 401.5343383734 |
| H | 257.5603621251 | 194.6241088308 | 400.6906950255 |
| H | 257.7237252678 | 191.4622186845 | 403.1351107095 |
| H | 256.9085116478 | 190.0743364565 | 399.2751860355 |
| H | 258.8084016492 | 194.2908998548 | 402.8159767056 |
| H | 256.1517910358 | 193.7292216011 | 403.9617496879 |
| H | 256.7402468546 | 192.6047773126 | 399.1733916021 |
| H | 257.7516640000 | 195.6461680000 | 402.9293770000 |
| H | 258.8826200000 | 190.1061770000 | 408.8618140000 |
| C | 262.5170000000 | 191.6280000000 | 404.4240000000 |
| C | 261.4195273910 | 190.7912610889 | 403.7061034990 |
| C | 261.0470455038 | 191.3209405411 | 402.3514220802 |
| N | 260.6955862942 | 192.6451199179 | 402.1482918334 |
| C | 260.9385035276 | 190.7400034507 | 401.1089016096 |
| C | 260.3728925993 | 192.8051221128 | 400.8309961917 |

|   |                |                |                |
|---|----------------|----------------|----------------|
| N | 260.5205853904 | 191.6705124308 | 400.1714469954 |
| H | 260.5205148546 | 190.7306496238 | 404.3366433022 |
| H | 261.7790296144 | 189.7677349121 | 403.5655047057 |
| H | 261.0886501472 | 189.7029302378 | 400.8411465843 |
| H | 260.0449062796 | 193.7377517380 | 400.3922088245 |
| H | 262.8571594626 | 191.0808959365 | 405.3134352034 |
| H | 260.5726374638 | 193.3154392428 | 402.8968267239 |
| H | 262.1236480000 | 192.5623940000 | 404.7661720000 |
| H | 263.3516530000 | 191.7181200000 | 403.7605750000 |
| C | 247.8970000000 | 194.0110000000 | 404.4930000000 |
| C | 248.2020000000 | 195.4880000000 | 404.7370000000 |
| O | 247.4356305146 | 196.1675465888 | 405.4263702565 |
| C | 246.7935033607 | 193.8165447900 | 403.4481702848 |
| O | 247.1966848642 | 194.2729142428 | 402.1630017715 |
| N | 249.3140000000 | 195.9620000000 | 404.1770000000 |
| C | 249.8020000000 | 197.3150000000 | 404.4650000000 |
| H | 245.9140494777 | 194.4083511379 | 403.7244346764 |
| H | 246.4968958120 | 192.7540295118 | 403.4246059553 |
| H | 248.0534571680 | 193.8691730634 | 401.9634260836 |
| H | 248.7974205724 | 193.4925164159 | 404.1245116857 |
| H | 249.0923258967 | 197.7718077535 | 405.1563875480 |
| H | 249.8752459633 | 195.3596520079 | 403.5858354191 |
| H | 250.7886165797 | 197.2671855464 | 404.9422670409 |
| H | 249.8831630000 | 197.9216560000 | 403.5873430000 |
| H | 247.6469520000 | 193.5211100000 | 405.4108150000 |
| C | 248.0800000000 | 189.8890000000 | 402.3840000000 |
| C | 249.0950000000 | 189.0790000000 | 403.1730000000 |
| O | 248.7615071676 | 188.1245080397 | 403.8747114099 |
| N | 250.3660000000 | 189.4520000000 | 403.0170000000 |
| C | 251.5130000000 | 188.7690000000 | 403.5980000000 |
| C | 251.3880000000 | 188.5090000000 | 405.0890000000 |
| O | 251.8603146857 | 187.5023320440 | 405.6367980724 |
| N | 250.8690000000 | 189.5060000000 | 405.7980000000 |
| C | 250.6660000000 | 189.4000000000 | 407.2250000000 |
| H | 248.3907836075 | 190.9347843343 | 402.2619320434 |
| H | 248.0297666682 | 189.4686746962 | 401.3704261054 |
| H | 252.3942764236 | 189.3981981616 | 403.4462918147 |
| H | 251.6971049937 | 187.8148426415 | 403.1052706190 |
| H | 250.5522244809 | 190.2909872431 | 402.4906347684 |
| H | 251.6166897720 | 189.3225926796 | 407.7656487399 |
| H | 250.1695077113 | 190.3104679794 | 407.5733560965 |
| H | 250.5426030167 | 190.3290153064 | 405.3135065566 |
| H | 247.0858870000 | 189.8764540000 | 402.7795790000 |
| H | 250.0641850000 | 188.5601270000 | 407.5030850000 |

|   |                |                |                |
|---|----------------|----------------|----------------|
| C | 252.9370000000 | 183.9060000000 | 405.2630000000 |
| C | 253.9953393915 | 185.0087713497 | 405.0933771874 |
| C | 253.9451163300 | 185.6811539080 | 403.7580656003 |
| N | 254.8949190468 | 186.5963920363 | 403.3270364579 |
| C | 252.9414955796 | 185.7469360384 | 402.8209183914 |
| C | 254.4184786724 | 187.1585257900 | 402.1740507276 |
| N | 253.2347633189 | 186.6801851424 | 401.8513921200 |
| H | 253.8351360927 | 185.7801730474 | 405.8519549993 |
| H | 254.9992499631 | 184.5894931350 | 405.2734953399 |
| H | 252.0241040503 | 185.1762434582 | 402.7895429628 |
| H | 254.9929263984 | 187.8756593102 | 401.6041643398 |
| H | 253.0318651310 | 183.1989691833 | 404.4256911562 |
| H | 255.8468763997 | 186.7416259419 | 403.6635405042 |
| H | 253.0716360000 | 183.3276930000 | 406.1531320000 |
| H | 251.9378550000 | 184.2828830000 | 405.1954110000 |
| C | 256.1350000000 | 184.2680000000 | 410.0930000000 |
| C | 254.8553806033 | 185.0187203736 | 409.6702820098 |
| C | 254.9121653038 | 185.6245965094 | 408.2473938196 |
| C | 255.8268217625 | 186.8564973777 | 408.0781008501 |
| N | 255.9042987246 | 187.4047594035 | 406.7131835319 |
| C | 255.2437036863 | 188.5027190167 | 406.2842492684 |
| N | 254.0967267902 | 188.8882884156 | 406.9146635569 |
| N | 255.7290327041 | 189.2213052226 | 405.2853160842 |
| H | 254.6216330954 | 185.8060271938 | 410.4020179474 |
| H | 254.0054771042 | 184.3247639495 | 409.6929910682 |
| H | 253.8972402028 | 185.9110016703 | 407.9507294731 |
| H | 255.2281527555 | 184.8482572978 | 407.5415647099 |
| H | 255.4862851969 | 187.6600017494 | 408.7418298118 |
| H | 256.8549426130 | 186.6040879895 | 408.3687164818 |
| H | 256.6726672505 | 187.1253918342 | 406.1010023229 |
| H | 253.3904284308 | 188.1508993493 | 406.9478890328 |
| H | 253.7061992708 | 189.7388351398 | 406.5029995073 |
| H | 255.1351289671 | 189.9468937590 | 404.8824542720 |
| H | 256.6079781486 | 188.9443939717 | 404.8433410681 |
| H | 256.9567099738 | 184.9973173875 | 410.1879359463 |
| H | 256.0745740000 | 183.8105880000 | 411.0584130000 |
| H | 256.4546020000 | 183.6142020000 | 409.3085880000 |
| C | 258.2840000000 | 182.3630000000 | 407.6130000000 |
| C | 259.1096293005 | 183.2921987907 | 406.6870560592 |
| C | 259.2682166878 | 182.7344988326 | 405.2590449042 |
| C | 259.8065810452 | 183.8256062530 | 404.3353402587 |
| O | 260.8323489033 | 184.4400927356 | 404.6184289591 |
| N | 259.0746392345 | 184.0778082666 | 403.2148784587 |
| H | 258.5808572065 | 184.2542318481 | 406.6128407580 |

|   |                |                |                |
|---|----------------|----------------|----------------|
| H | 260.1009027512 | 183.5243377136 | 407.0906275627 |
| H | 259.9755884814 | 181.8954008012 | 405.2540513095 |
| H | 258.3066143782 | 182.3490906233 | 404.8942221392 |
| H | 258.1532235466 | 183.6939261443 | 403.0641065184 |
| H | 259.3001988323 | 184.9138807516 | 402.6888923521 |
| H | 258.8592512696 | 181.4965761055 | 407.9580470764 |
| H | 257.9764080000 | 182.9526100000 | 408.4512410000 |
| H | 257.4941570000 | 182.0178150000 | 406.9790470000 |
| C | 266.7500000000 | 184.8280000000 | 405.9900000000 |
| C | 266.9001875939 | 184.5479974432 | 404.4817004945 |
| C | 266.4174775764 | 185.7113903933 | 403.5857507581 |
| C | 264.9645794501 | 186.1065344424 | 403.8346952915 |
| O | 264.6231634275 | 186.5853577585 | 404.9284147153 |
| N | 264.0917555582 | 185.8975186927 | 402.8299803704 |
| H | 266.3637684371 | 183.6299097564 | 404.2068881230 |
| H | 267.9564518199 | 184.3705984585 | 404.2393833242 |
| H | 267.0183670876 | 186.6030707162 | 403.8027126243 |
| H | 266.5793156615 | 185.4612021407 | 402.5302704752 |
| H | 263.1309758081 | 186.2495461706 | 402.9410626553 |
| H | 264.4089794759 | 185.5841268102 | 401.9252196840 |
| H | 265.7114548768 | 184.6909610663 | 406.3035068529 |
| H | 267.3694890000 | 184.1783430000 | 406.5723060000 |
| H | 266.9695250000 | 185.8595460000 | 406.1706120000 |
| C | 265.3830000000 | 185.7480000000 | 399.2270000000 |
| C | 264.4432234788 | 186.2104994924 | 398.0930859064 |
| C | 264.8541069539 | 187.6007320199 | 397.5558814541 |
| C | 264.6230370190 | 188.7576434566 | 398.5261880931 |
| O | 265.5167189575 | 189.5105769344 | 398.9010784052 |
| N | 263.3347395642 | 188.8863325209 | 398.9856785060 |
| H | 263.3964413576 | 186.2272269043 | 398.4247728153 |
| H | 264.4848677360 | 185.4981162160 | 397.2602560740 |
| H | 265.9203955044 | 187.6138911876 | 397.3087559397 |
| H | 264.3153968390 | 187.8159412485 | 396.6318279161 |
| H | 263.1220572000 | 189.7207664897 | 399.5164072680 |
| H | 262.5546802817 | 188.3947791027 | 398.5670682980 |
| H | 265.3426477412 | 186.4730018130 | 400.0544393488 |
| H | 266.3824140000 | 185.7920590000 | 398.8473550000 |
| H | 265.1501260000 | 184.7833370000 | 399.6271200000 |
| C | 264.6900000000 | 186.5740000000 | 390.9080000000 |
| C | 266.0210000000 | 186.4580000000 | 391.6570000000 |
| O | 266.9661311045 | 185.8584337608 | 391.1227612069 |
| N | 266.1040000000 | 187.0410000000 | 392.8470000000 |
| C | 267.3460000000 | 187.0190000000 | 393.6280000000 |
| H | 264.0510522500 | 187.3746603424 | 391.2913326616 |

|    |                |                |                |
|----|----------------|----------------|----------------|
| H  | 264.1458942140 | 185.6266796446 | 390.9893510852 |
| H  | 268.1859766895 | 186.8796061215 | 392.9459567354 |
| H  | 265.2703876944 | 187.4185107360 | 393.2832713776 |
| H  | 267.4446587913 | 187.9554945615 | 394.1844293371 |
| H  | 264.9291130000 | 186.7390320000 | 389.8781990000 |
| H  | 267.2858400000 | 186.1921450000 | 394.3044550000 |
| O  | 253.9780346699 | 186.6675604659 | 392.9438138891 |
| O  | 255.1533876990 | 187.4622201972 | 394.9670406283 |
| O  | 254.6826034628 | 184.9449291301 | 394.6331302771 |
| Cl | 254.0610250083 | 186.3164659590 | 394.4230783310 |

## The TS for the O-Cl cleavage of chlorate optimized using the bigger model

|    |                |                |                |
|----|----------------|----------------|----------------|
| Mo | 255.2937440000 | 188.1294480000 | 397.0070700000 |
| P  | 253.3062710000 | 192.3555910000 | 404.4788230000 |
| O  | 254.2422140000 | 193.4300780000 | 404.0120700000 |
| O  | 253.7587060000 | 191.0867450000 | 405.1340410000 |
| O  | 252.4231590000 | 191.8184010000 | 403.0809650000 |
| O  | 252.9036120000 | 193.2826530000 | 401.0329040000 |
| P  | 251.7761110000 | 192.8254520000 | 402.0390870000 |
| O  | 251.0494600000 | 193.9850400000 | 402.6409590000 |
| O  | 250.7548580000 | 191.8851220000 | 401.1997000000 |
| O  | 252.0525960000 | 192.9487190000 | 405.3316610000 |
| C  | 253.7835340000 | 192.2952800000 | 400.3967120000 |
| C  | 253.4381120000 | 192.2518310000 | 398.9170090000 |
| O  | 253.6464330000 | 193.5952430000 | 398.4565010000 |
| C  | 254.1702530000 | 191.1788510000 | 398.1457210000 |
| S  | 253.9331530000 | 189.5026180000 | 398.6107610000 |
| C  | 254.8960580000 | 191.4906180000 | 397.0523520000 |
| S  | 255.5900200000 | 190.2636450000 | 396.0346400000 |
| C  | 255.2161360000 | 192.9141740000 | 396.7016630000 |
| N  | 256.4292890000 | 193.3194790000 | 397.4300680000 |
| C  | 256.6367430000 | 194.7088320000 | 397.5395000000 |
| C  | 257.9112870000 | 195.1555560000 | 397.9686790000 |
| O  | 258.8917280000 | 194.4229750000 | 398.2217040000 |
| N  | 258.0160630000 | 196.5411240000 | 398.0864460000 |
| C  | 256.9845810000 | 197.3882590000 | 397.8294610000 |
| N  | 257.2573190000 | 198.7305200000 | 397.9564350000 |
| N  | 255.7729810000 | 196.9788140000 | 397.5175790000 |
| C  | 255.6150760000 | 195.6285370000 | 397.3602850000 |
| N  | 254.3676030000 | 195.1993900000 | 396.9506780000 |

|   |                |                |                |
|---|----------------|----------------|----------------|
| C | 254.0422040000 | 193.8093450000 | 397.0914450000 |
| P | 262.3620040000 | 187.9930540000 | 394.5170060000 |
| O | 262.4724890000 | 189.5535410000 | 394.1518100000 |
| O | 261.0805020000 | 187.5805610000 | 393.5957780000 |
| O | 263.5542410000 | 187.1547470000 | 394.2843650000 |
| O | 261.8535240000 | 187.8341440000 | 396.0348750000 |
| C | 260.5105780000 | 188.1765540000 | 396.4541110000 |
| C | 260.0050390000 | 187.1961790000 | 397.5040080000 |
| O | 260.6155880000 | 187.5569090000 | 398.7539170000 |
| C | 258.5011360000 | 187.2677260000 | 397.6956420000 |
| S | 257.5110410000 | 187.6703870000 | 396.3286830000 |
| C | 257.9174750000 | 187.0719200000 | 398.9056030000 |
| S | 256.1691660000 | 187.2553190000 | 399.0524840000 |
| C | 258.7007720000 | 186.6426670000 | 400.1326070000 |
| N | 258.3075440000 | 187.3863470000 | 401.3289640000 |
| C | 259.1975750000 | 187.3073630000 | 402.4167280000 |
| C | 258.7618700000 | 187.3840200000 | 403.7679860000 |
| O | 257.5807250000 | 187.4200370000 | 404.2119300000 |
| N | 259.7910900000 | 187.4482920000 | 404.7115700000 |
| C | 261.1123820000 | 187.3376830000 | 404.4091630000 |
| N | 262.0090610000 | 187.4323930000 | 405.4195530000 |
| N | 261.5316420000 | 187.1927720000 | 403.1617910000 |
| C | 260.5759430000 | 187.1860700000 | 402.1959290000 |
| N | 261.0411320000 | 187.0059950000 | 400.9263740000 |
| C | 260.2371550000 | 186.6581660000 | 399.7885120000 |
| P | 263.9321590000 | 190.4456420000 | 393.9981260000 |
| O | 263.5364440000 | 191.8099130000 | 393.5110950000 |
| O | 264.6621410000 | 190.2102230000 | 395.2958490000 |
| O | 264.6576130000 | 189.6306200000 | 392.7882440000 |
| H | 253.6798990000 | 191.3127840000 | 400.8649910000 |
| H | 254.7950290000 | 192.6496650000 | 400.5535650000 |
| H | 257.2550690000 | 192.8505800000 | 397.0565160000 |
| H | 258.9656220000 | 196.9225230000 | 398.1615270000 |
| H | 256.5936600000 | 199.3207720000 | 397.4770540000 |
| H | 258.2327260000 | 198.9857270000 | 397.8426870000 |
| H | 253.6059030000 | 195.8437330000 | 397.1513110000 |
| H | 260.5292290000 | 189.1728300000 | 396.8828780000 |
| H | 259.8387060000 | 188.1630960000 | 395.5996870000 |
| H | 260.3170090000 | 186.1787390000 | 397.2162350000 |
| H | 258.4518270000 | 185.5852840000 | 400.3211770000 |
| H | 257.9680270000 | 188.3405540000 | 401.1832100000 |
| H | 261.6771230000 | 187.2093740000 | 406.3472480000 |
| H | 262.9739570000 | 187.1483300000 | 405.2025050000 |
| H | 262.0403190000 | 187.0729030000 | 400.7782150000 |



|   |                |                |                |
|---|----------------|----------------|----------------|
| H | 260.5019050000 | 185.6415250000 | 399.4410100000 |
| H | 259.5125970000 | 187.6496940000 | 405.6707200000 |
| H | 260.5431350000 | 188.3403320000 | 393.3288110000 |
| H | 251.1913610000 | 191.2516690000 | 400.6048770000 |
| H | 264.6678240000 | 190.1977880000 | 392.0052710000 |
| H | 251.6835900000 | 193.7228630000 | 404.8751200000 |
| H | 252.3567250000 | 192.0293480000 | 398.8450240000 |
| H | 255.3550830000 | 193.0192820000 | 395.6154040000 |
| H | 253.2084790000 | 193.5658340000 | 396.4250460000 |
| C | 253.8150000000 | 181.3190000000 | 393.8550000000 |
| C | 252.5509510000 | 180.9780500000 | 393.0556580000 |
| C | 251.2937540000 | 181.5629680000 | 393.6681230000 |
| C | 251.1910170000 | 182.9390950000 | 393.9237400000 |
| C | 250.1932620000 | 180.7589190000 | 393.9910800000 |
| C | 250.0286100000 | 183.4918570000 | 394.4558490000 |
| C | 249.0166450000 | 181.3008020000 | 394.5111730000 |
| C | 248.9241780000 | 182.6761440000 | 394.7259380000 |
| O | 247.7427730000 | 183.1886210000 | 395.2079520000 |
| H | 252.4399730000 | 179.8899460000 | 392.9670440000 |
| H | 252.6763320000 | 181.3610780000 | 392.0345070000 |
| H | 250.2499140000 | 179.6867650000 | 393.8143890000 |
| H | 252.0299710000 | 183.5915950000 | 393.7004510000 |
| H | 248.1543400000 | 180.6791220000 | 394.7309310000 |
| H | 249.9629210000 | 184.5604840000 | 394.6322380000 |
| H | 247.5805780000 | 184.0269340000 | 394.7533650000 |
| H | 253.9491600000 | 182.4024890000 | 393.9072610000 |
| H | 254.7073920000 | 180.9467450000 | 393.3967840000 |
| H | 253.7456650000 | 180.9723260000 | 394.8649060000 |
| C | 250.7220000000 | 189.7720000000 | 397.2660000000 |
| C | 251.7060000000 | 190.2220000000 | 396.2070000000 |
| O | 251.8433070000 | 191.4527730000 | 396.0035430000 |
| C | 250.5315130000 | 188.2866230000 | 397.6393930000 |
| C | 249.4874210000 | 187.6385240000 | 396.6981810000 |
| C | 250.1705410000 | 188.1805550000 | 399.1285230000 |
| C | 248.9772620000 | 186.2533310000 | 397.1091310000 |
| N | 252.1860000000 | 189.2760000000 | 395.4020000000 |
| C | 253.0110000000 | 189.6170000000 | 394.2560000000 |
| C | 252.3720000000 | 189.5290000000 | 392.8820000000 |
| O | 251.1354750000 | 189.4611570000 | 392.7335590000 |
| N | 253.2200000000 | 189.6570000000 | 391.8670000000 |
| C | 252.7880000000 | 189.7520000000 | 390.4780000000 |
| C | 252.6390000000 | 188.3760000000 | 389.8630000000 |
| O | 253.3248730000 | 188.0306510000 | 388.8962370000 |
| N | 251.7410000000 | 187.5940000000 | 390.4440000000 |

|   |                |                |                |
|---|----------------|----------------|----------------|
| C | 251.5650000000 | 186.1910000000 | 390.0800000000 |
| C | 251.1707360000 | 185.3711240000 | 391.3253670000 |
| C | 249.8954980000 | 185.7557310000 | 392.0253600000 |
| C | 249.7438060000 | 186.7675240000 | 392.9450680000 |
| C | 248.6229050000 | 185.0809780000 | 391.9570650000 |
| N | 248.4506050000 | 186.7675540000 | 393.4416870000 |
| C | 247.7379640000 | 185.7424050000 | 392.8599240000 |
| C | 248.1595900000 | 183.9486930000 | 391.2694500000 |
| C | 246.4220390000 | 185.3110020000 | 393.0713100000 |
| C | 246.8571930000 | 183.5103810000 | 391.4818990000 |
| C | 245.9957010000 | 184.1854230000 | 392.3701880000 |
| H | 251.4832830000 | 187.7691030000 | 397.5298410000 |
| H | 249.2532250000 | 188.7414380000 | 399.3580860000 |
| H | 250.9960190000 | 188.5616090000 | 399.7376820000 |
| H | 250.0267760000 | 187.1436860000 | 399.4373170000 |
| H | 248.6211310000 | 188.3149140000 | 396.6169550000 |
| H | 249.9243800000 | 187.5876360000 | 395.6932040000 |
| H | 248.3317570000 | 186.3074720000 | 397.9903380000 |
| H | 248.4013680000 | 185.7896390000 | 396.3020960000 |
| H | 249.7992410000 | 185.5802270000 | 397.3555650000 |
| H | 251.0102680000 | 190.3255250000 | 398.1681390000 |
| H | 253.3492520000 | 190.6433390000 | 394.3907840000 |
| H | 253.9104310000 | 189.0052300000 | 394.2701560000 |
| H | 252.2421030000 | 188.3300350000 | 395.7637680000 |
| H | 251.8384880000 | 190.2988130000 | 390.4425990000 |
| H | 254.2398480000 | 189.5561500000 | 391.9949060000 |
| H | 252.0005770000 | 185.4742120000 | 392.0300360000 |
| H | 251.1232000000 | 184.3116550000 | 391.0497610000 |
| H | 250.4431410000 | 187.5203060000 | 393.2769510000 |
| H | 248.0987690000 | 187.4293820000 | 394.1136880000 |
| H | 248.8212710000 | 183.4119360000 | 390.5958640000 |
| H | 246.4968720000 | 182.6263940000 | 390.9637400000 |
| H | 245.7621080000 | 185.8314020000 | 393.7606040000 |
| H | 244.9854980000 | 183.8160650000 | 392.5207570000 |
| H | 252.5548640000 | 185.8435660000 | 389.7604920000 |
| H | 251.1687830000 | 187.9879700000 | 391.1829380000 |
| H | 253.5563300000 | 190.2820710000 | 389.9153720000 |
| H | 250.9368910000 | 186.0076260000 | 389.2333870000 |
| H | 249.7488630000 | 190.1330500000 | 397.0061030000 |
| C | 257.4180000000 | 180.5500000000 | 392.8130000000 |
| C | 257.7155820000 | 181.6746500000 | 391.7917310000 |
| C | 256.4428510000 | 182.1942610000 | 391.1564320000 |
| C | 255.7130160000 | 183.2150340000 | 391.7817550000 |
| C | 255.9248150000 | 181.6282980000 | 389.9829400000 |

|   |                |                |                |
|---|----------------|----------------|----------------|
| C | 254.4948590000 | 183.6508230000 | 391.2595640000 |
| C | 254.7089730000 | 182.0641660000 | 389.4520240000 |
| C | 253.9879330000 | 183.0761920000 | 390.0918680000 |
| H | 258.2174580000 | 182.4969580000 | 392.3142990000 |
| H | 258.4091270000 | 181.3147990000 | 391.0221260000 |
| H | 256.4825020000 | 180.8399220000 | 389.4810430000 |
| H | 256.0913740000 | 183.6780390000 | 392.6893340000 |
| H | 254.3275940000 | 181.6183820000 | 388.5366280000 |
| H | 253.9679060000 | 184.4536490000 | 391.7631030000 |
| H | 253.0455110000 | 183.4228670000 | 389.6768790000 |
| H | 258.2903530000 | 180.3790810000 | 393.4538280000 |
| H | 256.6123450000 | 180.8882630000 | 393.4305750000 |
| H | 257.1886380000 | 179.6229030000 | 392.3305230000 |
| C | 256.5880000000 | 185.6260000000 | 388.1370000000 |
| C | 256.6638850000 | 186.8714080000 | 389.0439060000 |
| C | 256.4981160000 | 186.4772330000 | 390.5153660000 |
| C | 257.9608270000 | 187.6636350000 | 388.8313990000 |
| H | 255.8191190000 | 187.5248520000 | 388.7890920000 |
| H | 257.9522230000 | 188.5729500000 | 389.4445430000 |
| H | 258.8375660000 | 187.0686750000 | 389.1208680000 |
| H | 258.0915800000 | 187.9628530000 | 387.7840110000 |
| H | 256.5218850000 | 187.3507590000 | 391.1668240000 |
| H | 257.2863230000 | 185.7789800000 | 390.8304450000 |
| H | 255.5409090000 | 185.9806910000 | 390.6771080000 |
| H | 255.6167840000 | 185.1407950000 | 388.3070850000 |
| H | 256.5957310000 | 185.9043160000 | 387.1038590000 |
| H | 257.3113660000 | 184.8932020000 | 388.4279430000 |
| C | 257.8290000000 | 191.8650000000 | 391.3050000000 |
| C | 258.2018380000 | 190.5350620000 | 391.9463820000 |
| C | 256.9727540000 | 189.7232240000 | 392.3276120000 |
| O | 255.9718090000 | 189.7117280000 | 391.5900440000 |
| N | 257.1039330000 | 188.9767570000 | 393.4348920000 |
| H | 258.8356390000 | 190.6790430000 | 392.8213320000 |
| H | 258.7660510000 | 189.9186830000 | 391.2319940000 |
| H | 257.7145610000 | 189.3275510000 | 394.1727800000 |
| H | 256.3228250000 | 188.3945930000 | 393.7362460000 |
| H | 257.1033460000 | 191.6730750000 | 390.5073940000 |
| H | 258.6802010000 | 192.3357680000 | 390.8592030000 |
| H | 257.3472600000 | 192.5084820000 | 392.0112270000 |
| C | 257.2040000000 | 182.8230000000 | 398.2410000000 |
| C | 256.2080000000 | 182.9730000000 | 399.3890000000 |
| O | 256.2914390000 | 183.9198200000 | 400.1712850000 |
| C | 257.0281140000 | 183.9137630000 | 397.1705760000 |
| C | 258.1650000000 | 184.0174710000 | 396.1672320000 |

|   |                |                |                |
|---|----------------|----------------|----------------|
| C | 259.4609580000 | 183.5487590000 | 396.4189620000 |
| C | 257.9483360000 | 184.7093640000 | 394.9642180000 |
| C | 260.5117730000 | 183.7909590000 | 395.5309170000 |
| C | 258.9877470000 | 184.9636670000 | 394.0720420000 |
| C | 260.2859470000 | 184.5179490000 | 394.3593870000 |
| O | 261.3488140000 | 184.7433540000 | 393.5323510000 |
| N | 255.2930000000 | 182.0110000000 | 399.5380000000 |
| C | 254.2780000000 | 182.0760000000 | 400.5800000000 |
| C | 253.0560000000 | 182.8560000000 | 400.1430000000 |
| O | 252.1588660000 | 183.0681840000 | 400.9581310000 |
| N | 253.0020000000 | 183.1650000000 | 398.8590000000 |
| C | 251.9230000000 | 184.0210000000 | 398.3810000000 |
| C | 252.4626030000 | 184.9388900000 | 397.2975030000 |
| C | 253.0960520000 | 186.1878880000 | 397.8727240000 |
| O | 253.0394220000 | 186.4968640000 | 399.0442180000 |
| O | 253.6463520000 | 186.9023300000 | 396.9097120000 |
| H | 256.9254880000 | 184.8756650000 | 397.6824690000 |
| H | 256.0843130000 | 183.7641310000 | 396.6312150000 |
| H | 256.9544240000 | 185.0811790000 | 394.7423710000 |
| H | 259.6811520000 | 182.9998820000 | 397.3299880000 |
| H | 258.7959280000 | 185.5292870000 | 393.1639790000 |
| H | 261.5201460000 | 183.4489570000 | 395.7412940000 |
| H | 261.2259640000 | 185.5983100000 | 393.0929270000 |
| H | 258.1814540000 | 182.9363020000 | 398.7192850000 |
| H | 254.6964500000 | 182.5875450000 | 401.4489780000 |
| H | 253.9698010000 | 181.0677980000 | 400.8678530000 |
| H | 255.2741300000 | 181.2420770000 | 398.8849640000 |
| H | 251.6683070000 | 185.2557460000 | 396.6115800000 |
| H | 253.1930420000 | 184.4374160000 | 396.6513560000 |
| H | 251.5653500000 | 184.6054660000 | 399.2299510000 |
| H | 253.8239630000 | 183.0661370000 | 398.2858370000 |
| H | 257.1746610000 | 181.8511420000 | 397.7943120000 |
| H | 251.0853860000 | 183.5187120000 | 397.9439530000 |
| C | 252.3740000000 | 194.4250000000 | 391.2270000000 |
| C | 251.5179360000 | 193.8987510000 | 392.3754540000 |
| O | 251.1744010000 | 194.9375910000 | 393.3280000000 |
| C | 252.2170290000 | 192.7347010000 | 393.0590220000 |
| H | 250.5436440000 | 193.5811070000 | 391.9847500000 |
| H | 251.5779620000 | 192.1823780000 | 393.7432590000 |
| H | 253.0797000000 | 193.1010410000 | 393.6319830000 |
| H | 252.6032210000 | 192.0347450000 | 392.3164590000 |
| H | 251.9724780000 | 195.1273100000 | 393.8426770000 |
| H | 252.2566820000 | 193.7330010000 | 390.3820410000 |
| H | 253.4126370000 | 194.3660190000 | 391.4773090000 |

|   |                |                |                |
|---|----------------|----------------|----------------|
| H | 252.0451240000 | 195.3825470000 | 390.8808150000 |
| C | 252.9230000000 | 197.6780000000 | 399.7280000000 |
| C | 251.9290000000 | 197.6090000000 | 398.5540000000 |
| O | 251.9821520000 | 196.6735720000 | 397.7315520000 |
| C | 252.8122470000 | 196.4030360000 | 400.5787610000 |
| O | 251.4515190000 | 196.3612640000 | 401.0174270000 |
| C | 253.7898790000 | 196.4209290000 | 401.7531060000 |
| N | 251.0510000000 | 198.6040000000 | 398.4340000000 |
| C | 250.2740000000 | 198.7450000000 | 397.2000000000 |
| C | 248.8805600000 | 198.0831140000 | 397.3154860000 |
| C | 248.3358370000 | 197.4121320000 | 396.0402140000 |
| C | 249.2383270000 | 196.3292920000 | 395.4010240000 |
| N | 249.9237230000 | 195.5208950000 | 396.4056870000 |
| C | 250.1538520000 | 194.2053780000 | 396.3698990000 |
| N | 249.6922090000 | 193.4350880000 | 395.3541690000 |
| N | 250.8073130000 | 193.6171630000 | 397.3795920000 |
| H | 253.0367350000 | 195.5412410000 | 399.9386180000 |
| H | 253.7128500000 | 195.4992890000 | 402.3373120000 |
| H | 253.5747390000 | 197.2690880000 | 402.4136610000 |
| H | 254.8226060000 | 196.5069360000 | 401.3970070000 |
| H | 251.3284450000 | 195.5529080000 | 401.5451460000 |
| H | 253.9174090000 | 197.7127560000 | 399.2637110000 |
| H | 248.9482960000 | 197.3226940000 | 398.1000200000 |
| H | 248.1462870000 | 198.8139700000 | 397.6720760000 |
| H | 247.3734210000 | 196.9587550000 | 396.3023710000 |
| H | 248.1274850000 | 198.1613160000 | 395.2660130000 |
| H | 249.9835210000 | 196.7793510000 | 394.7351250000 |
| H | 248.6233320000 | 195.6814170000 | 394.7740770000 |
| H | 250.5785690000 | 196.0337830000 | 397.0107930000 |
| H | 250.0605810000 | 192.4865430000 | 395.3828300000 |
| H | 249.8299800000 | 193.8767110000 | 394.4469800000 |
| H | 251.2640170000 | 194.1868460000 | 398.0831810000 |
| H | 251.2464730000 | 192.7158880000 | 397.1381210000 |
| H | 250.8629140000 | 198.2544700000 | 396.4209710000 |
| H | 251.0169720000 | 199.3151340000 | 399.1476150000 |
| H | 252.8225450000 | 198.5275040000 | 400.3707690000 |
| H | 250.2454670000 | 199.7826420000 | 396.9404150000 |
| C | 262.4400000000 | 198.8490000000 | 397.8030000000 |
| C | 261.3740000000 | 197.9840000000 | 397.1570000000 |
| O | 260.2218310000 | 197.9837120000 | 397.6278960000 |
| N | 261.7390000000 | 197.3100000000 | 396.0760000000 |
| C | 260.9410000000 | 196.2040000000 | 395.5760000000 |
| C | 261.7590000000 | 194.9410000000 | 395.8170000000 |
| O | 262.7411700000 | 194.7408540000 | 395.0934770000 |

|   |                |                |                |
|---|----------------|----------------|----------------|
| C | 260.5461270000 | 196.3460530000 | 394.0952730000 |
| C | 259.7282150000 | 195.1172190000 | 393.6666790000 |
| C | 259.7666610000 | 197.6460720000 | 393.8660620000 |
| N | 261.4030000000 | 194.1810000000 | 396.8510000000 |
| C | 262.2440000000 | 193.0760000000 | 397.2940000000 |
| C | 263.7130000000 | 193.5310000000 | 397.3750000000 |
| O | 263.9566360000 | 194.5978290000 | 397.9535060000 |
| C | 262.0587720000 | 191.8418730000 | 396.4242810000 |
| C | 260.6418400000 | 191.4820440000 | 396.2658980000 |
| N | 259.7682480000 | 191.2746730000 | 397.3111110000 |
| C | 259.9251490000 | 191.2323460000 | 395.1240460000 |
| C | 258.5859920000 | 190.8830480000 | 396.7641050000 |
| N | 258.6425030000 | 190.8473560000 | 395.4376160000 |
| N | 264.6520000000 | 192.7720000000 | 396.8360000000 |
| C | 266.0420000000 | 193.1750000000 | 397.0130000000 |
| C | 266.3610000000 | 194.3290000000 | 396.0730000000 |
| O | 267.3196350000 | 195.0726320000 | 396.3163660000 |
| C | 267.0171830000 | 191.9975860000 | 396.8290470000 |
| O | 267.0851030000 | 191.4996750000 | 395.5117240000 |
| N | 265.6370000000 | 194.4210000000 | 394.9660000000 |
| C | 265.9150000000 | 195.4720000000 | 393.9890000000 |
| C | 265.0319400000 | 195.2399650000 | 392.7454320000 |
| O | 265.1932340000 | 193.9421080000 | 392.1954700000 |
| C | 265.3768580000 | 196.2383580000 | 391.6439040000 |
| H | 263.0010950000 | 199.4192240000 | 397.0550940000 |
| H | 261.4745310000 | 196.3657080000 | 393.5112110000 |
| H | 258.8196000000 | 195.0219980000 | 394.2750540000 |
| H | 259.4216880000 | 195.2022490000 | 392.6193090000 |
| H | 260.3032530000 | 194.1937280000 | 393.7738170000 |
| H | 260.3500330000 | 198.5229590000 | 394.1648840000 |
| H | 258.8363570000 | 197.6476980000 | 394.4485670000 |
| H | 259.5007910000 | 197.7577620000 | 392.8096730000 |
| H | 260.0240580000 | 196.1891400000 | 396.1692110000 |
| H | 262.7279530000 | 197.2484150000 | 395.8558790000 |
| H | 262.6261850000 | 191.0027050000 | 396.8442440000 |
| H | 262.4536240000 | 192.0575780000 | 395.4321280000 |
| H | 260.3001450000 | 191.2977850000 | 394.1129290000 |
| H | 257.7443010000 | 190.5766250000 | 397.3575150000 |
| H | 261.9439350000 | 192.8582000000 | 398.3238420000 |
| H | 260.5477170000 | 194.3737280000 | 397.3711340000 |
| H | 266.7442970000 | 191.2156480000 | 397.5544320000 |
| H | 268.0108950000 | 192.3815870000 | 397.0859980000 |
| H | 266.3059160000 | 190.9266840000 | 395.3726140000 |
| H | 266.1618840000 | 193.5704180000 | 398.0253330000 |

|   |                |                |                |
|---|----------------|----------------|----------------|
| H | 264.4678280000 | 191.8795990000 | 396.3824220000 |
| H | 263.9873990000 | 195.3908840000 | 393.0603680000 |
| H | 265.2936750000 | 197.2716980000 | 392.0002580000 |
| H | 264.7066610000 | 196.1029820000 | 390.7899850000 |
| H | 266.4032720000 | 196.0697880000 | 391.3001780000 |
| H | 264.6745750000 | 193.2980100000 | 392.7113440000 |
| H | 266.9792110000 | 195.4497030000 | 393.7352940000 |
| H | 264.7715040000 | 193.9035540000 | 394.8903470000 |
| H | 259.9774190000 | 191.3697370000 | 398.3212650000 |
| H | 262.0018150000 | 199.5151590000 | 398.5165310000 |
| H | 263.1562130000 | 198.1962420000 | 398.3169380000 |
| H | 265.6768690000 | 196.4273180000 | 394.4079990000 |
| C | 259.4900000000 | 190.5140000000 | 408.0810000000 |
| C | 258.6590000000 | 191.0440000000 | 406.9170000000 |
| O | 258.5482550000 | 190.3976950000 | 405.8684040000 |
| C | 260.4792970000 | 189.4269280000 | 407.6449840000 |
| O | 259.8804390000 | 188.1294660000 | 407.5055140000 |
| N | 258.0660000000 | 192.2110000000 | 407.1150000000 |
| C | 257.1360000000 | 192.7790000000 | 406.1320000000 |
| C | 257.8810000000 | 193.5140000000 | 405.0200000000 |
| O | 259.1044080000 | 193.7014930000 | 405.1127300000 |
| C | 256.2794270000 | 193.7314600000 | 406.9848440000 |
| C | 257.3115500000 | 194.2914950000 | 407.9753330000 |
| C | 258.1997100000 | 193.0757710000 | 408.2986790000 |
| N | 257.1570000000 | 193.9310000000 | 403.9930000000 |
| C | 257.7580000000 | 194.5810000000 | 402.8280000000 |
| C | 257.1034640000 | 194.0987790000 | 401.5280970000 |
| C | 257.2222270000 | 192.6127820000 | 401.2904160000 |
| N | 256.9855530000 | 192.0817530000 | 400.0322850000 |
| C | 257.4677830000 | 191.5114670000 | 402.0915240000 |
| C | 257.0863120000 | 190.7277230000 | 400.1232620000 |
| N | 257.3831290000 | 190.3473120000 | 401.3525490000 |
| H | 261.3073720000 | 189.3721550000 | 408.3658360000 |
| H | 260.8978680000 | 189.6543140000 | 406.6639000000 |
| H | 259.5131490000 | 187.8571440000 | 408.3552650000 |
| H | 260.0640960000 | 191.3284600000 | 408.5366560000 |
| H | 255.5051500000 | 193.1556230000 | 407.5030360000 |
| H | 255.7837680000 | 194.4917100000 | 406.3786310000 |
| H | 256.8669390000 | 194.7275680000 | 408.8739090000 |
| H | 257.9150540000 | 195.0600220000 | 407.4827100000 |
| H | 257.8498170000 | 192.5512440000 | 409.1977400000 |
| H | 259.2430870000 | 193.3675740000 | 408.4559930000 |
| H | 256.5339260000 | 191.9772610000 | 405.6954730000 |
| H | 256.0445980000 | 194.3972940000 | 401.5268030000 |

|   |                |                |                |
|---|----------------|----------------|----------------|
| H | 257.5735000000 | 194.6306550000 | 400.6916940000 |
| H | 257.7186680000 | 191.4793180000 | 403.1410830000 |
| H | 256.9004290000 | 190.0621480000 | 399.2932500000 |
| H | 258.8075360000 | 194.2905680000 | 402.8241480000 |
| H | 256.1553030000 | 193.7204310000 | 403.9600270000 |
| H | 256.7660270000 | 192.5931490000 | 399.1668810000 |
| H | 257.7516640000 | 195.6461680000 | 402.9293770000 |
| H | 258.8826200000 | 190.1061770000 | 408.8618140000 |
| C | 262.5170000000 | 191.6280000000 | 404.4240000000 |
| C | 261.4130520000 | 190.7982210000 | 403.7124970000 |
| C | 261.0334000000 | 191.3073880000 | 402.3532100000 |
| N | 260.7202640000 | 192.6344870000 | 402.1122280000 |
| C | 260.8872390000 | 190.6912600000 | 401.1297320000 |
| C | 260.3865900000 | 192.7649110000 | 400.7948640000 |
| N | 260.4886810000 | 191.6063570000 | 400.1690690000 |
| H | 260.5187150000 | 190.7487270000 | 404.3481270000 |
| H | 261.7644220000 | 189.7721270000 | 403.5806140000 |
| H | 261.0073280000 | 189.6448330000 | 400.8892160000 |
| H | 260.0786340000 | 193.6935150000 | 400.3345080000 |
| H | 262.8547200000 | 191.0788200000 | 405.3112340000 |
| H | 260.6317900000 | 193.3343090000 | 402.8359100000 |
| H | 262.1236480000 | 192.5623940000 | 404.7661720000 |
| H | 263.3516530000 | 191.7181200000 | 403.7605750000 |
| C | 247.8970000000 | 194.0110000000 | 404.4930000000 |
| C | 248.2020000000 | 195.4880000000 | 404.7370000000 |
| O | 247.4373070000 | 196.1667450000 | 405.4276680000 |
| C | 246.7923370000 | 193.8284160000 | 403.4484350000 |
| O | 247.1888270000 | 194.3125450000 | 402.1711660000 |
| N | 249.3140000000 | 195.9620000000 | 404.1770000000 |
| C | 249.8020000000 | 197.3150000000 | 404.4650000000 |
| H | 245.9112360000 | 194.4102530000 | 403.7369240000 |
| H | 246.5008280000 | 192.7661330000 | 403.4052720000 |
| H | 248.0351560000 | 193.8991700000 | 401.9490790000 |
| H | 248.7949840000 | 193.4948430000 | 404.1188450000 |
| H | 249.0917870000 | 197.7710510000 | 405.1553160000 |
| H | 249.8703480000 | 195.3629010000 | 403.5790020000 |
| H | 250.7886070000 | 197.2662920000 | 404.9405900000 |
| H | 249.8831630000 | 197.9216560000 | 403.5873430000 |
| H | 247.6469520000 | 193.5211100000 | 405.4108150000 |
| C | 248.0800000000 | 189.8890000000 | 402.3840000000 |
| C | 249.0950000000 | 189.0790000000 | 403.1730000000 |
| O | 248.7591250000 | 188.1271680000 | 403.8757110000 |
| N | 250.3660000000 | 189.4520000000 | 403.0170000000 |
| C | 251.5130000000 | 188.7690000000 | 403.5980000000 |



|   |               |               |               |
|---|---------------|---------------|---------------|
| C | 251.388000000 | 188.509000000 | 405.089000000 |
| O | 251.849755000 | 187.496716000 | 405.633477000 |
| N | 250.869000000 | 189.506000000 | 405.798000000 |
| C | 250.666000000 | 189.400000000 | 407.225000000 |
| H | 248.392687000 | 190.932571000 | 402.256595000 |
| H | 248.026415000 | 189.462560000 | 401.374091000 |
| H | 252.396356000 | 189.390131000 | 403.441333000 |
| H | 251.689646000 | 187.811059000 | 403.109470000 |
| H | 250.554017000 | 190.279923000 | 402.476282000 |
| H | 251.618493000 | 189.319226000 | 407.761928000 |
| H | 250.171890000 | 190.311125000 | 407.570930000 |
| H | 250.570523000 | 190.341877000 | 405.318696000 |
| H | 247.085887000 | 189.876454000 | 402.779579000 |
| H | 250.064185000 | 188.560127000 | 407.503085000 |
| C | 252.937000000 | 183.906000000 | 405.263000000 |
| C | 253.992318000 | 185.005655000 | 405.081354000 |
| C | 253.930301000 | 185.662936000 | 403.740656000 |
| N | 254.854057000 | 186.601954000 | 403.301986000 |
| C | 252.931559000 | 185.683758000 | 402.795037000 |
| C | 254.368015000 | 187.135435000 | 402.139274000 |
| N | 253.201899000 | 186.613886000 | 401.816343000 |
| H | 253.837539000 | 185.780949000 | 405.835768000 |
| H | 254.996303000 | 184.589257000 | 405.259492000 |
| H | 252.036525000 | 185.080377000 | 402.762015000 |
| H | 254.921397000 | 187.863008000 | 401.563001000 |
| H | 253.030332000 | 183.196525000 | 404.428543000 |
| H | 255.773039000 | 186.813708000 | 403.684197000 |
| H | 253.071636000 | 183.327693000 | 406.153132000 |
| H | 251.937855000 | 184.282883000 | 405.195411000 |
| C | 256.135000000 | 184.268000000 | 410.093000000 |
| C | 254.858912000 | 185.014314000 | 409.665697000 |
| C | 254.922115000 | 185.600206000 | 408.238104000 |
| C | 255.871487000 | 186.800149000 | 408.055619000 |
| N | 255.957428000 | 187.344991000 | 406.691258000 |
| C | 255.294005000 | 188.443588000 | 406.269488000 |
| N | 254.137359000 | 188.809471000 | 406.891577000 |
| N | 255.786203000 | 189.185865000 | 405.294331000 |
| H | 254.628802000 | 185.810730000 | 410.387025000 |
| H | 254.007534000 | 184.323731000 | 409.696173000 |
| H | 253.914565000 | 185.910348000 | 407.943618000 |
| H | 255.211221000 | 184.807838000 | 407.539886000 |
| H | 255.560669000 | 187.612260000 | 408.722478000 |
| H | 256.891966000 | 186.515511000 | 408.337841000 |
| H | 256.740161000 | 187.082516000 | 406.091762000 |

|   |                |                |                |
|---|----------------|----------------|----------------|
| H | 253.4344700000 | 188.0700620000 | 406.9100090000 |
| H | 253.7417090000 | 189.6585470000 | 406.4830950000 |
| H | 255.1861630000 | 189.9049540000 | 404.8888150000 |
| H | 256.6755860000 | 188.9297770000 | 404.8635440000 |
| H | 256.9557140000 | 184.9961020000 | 410.1876220000 |
| H | 256.0745740000 | 183.8105880000 | 411.0584130000 |
| H | 256.4546020000 | 183.6142020000 | 409.3085880000 |
| C | 258.2840000000 | 182.3630000000 | 407.6130000000 |
| C | 259.0955830000 | 183.3023290000 | 406.6846550000 |
| C | 259.2269250000 | 182.7704740000 | 405.2456870000 |
| C | 259.7652400000 | 183.8557990000 | 404.3155940000 |
| O | 260.7843100000 | 184.4780760000 | 404.6029190000 |
| N | 259.0485190000 | 184.0823510000 | 403.1802210000 |
| H | 258.5645010000 | 184.2641510000 | 406.6357780000 |
| H | 260.0931980000 | 183.5289140000 | 407.0709940000 |
| H | 259.9199500000 | 181.9206870000 | 405.2194180000 |
| H | 258.2554720000 | 182.4024260000 | 404.8915180000 |
| H | 258.1258230000 | 183.6994090000 | 403.0367160000 |
| H | 259.2756370000 | 184.9064230000 | 402.6374080000 |
| H | 258.8653630000 | 181.5005450000 | 407.9537700000 |
| H | 257.9764080000 | 182.9526100000 | 408.4512410000 |
| H | 257.4941570000 | 182.0178150000 | 406.9790470000 |
| C | 266.7500000000 | 184.8280000000 | 405.9900000000 |
| C | 266.9052350000 | 184.5234780000 | 404.4888160000 |
| C | 266.4410420000 | 185.6630790000 | 403.5562180000 |
| C | 264.9954980000 | 186.0823100000 | 403.7894450000 |
| O | 264.6711330000 | 186.6176840000 | 404.8602870000 |
| N | 264.1106900000 | 185.8293020000 | 402.8049290000 |
| H | 266.3643890000 | 183.6031160000 | 404.2339110000 |
| H | 267.9609550000 | 184.3307410000 | 404.2592980000 |
| H | 267.0510490000 | 186.5531370000 | 403.7481660000 |
| H | 266.6039100000 | 185.3772180000 | 402.5108530000 |
| H | 263.1537420000 | 186.1984270000 | 402.8989170000 |
| H | 264.4226660000 | 185.4797340000 | 401.9127070000 |
| H | 265.7112000000 | 184.6911190000 | 406.3028320000 |
| H | 267.3694890000 | 184.1783430000 | 406.5723060000 |
| H | 266.9695250000 | 185.8595460000 | 406.1706120000 |
| C | 265.3830000000 | 185.7480000000 | 399.2270000000 |
| C | 264.4295640000 | 186.2151670000 | 398.1123850000 |
| C | 264.8063150000 | 187.6221720000 | 397.6038480000 |
| C | 264.5707590000 | 188.7452830000 | 398.6072900000 |
| O | 265.4582270000 | 189.5054820000 | 398.9802360000 |
| N | 263.2929750000 | 188.8309530000 | 399.1126430000 |
| H | 263.3871170000 | 186.2058340000 | 398.4543260000 |

|    |                |                |                |
|----|----------------|----------------|----------------|
| H  | 264.4749420000 | 185.5220950000 | 397.2647670000 |
| H  | 265.8678580000 | 187.6625270000 | 397.3441920000 |
| H  | 264.2523520000 | 187.8505560000 | 396.6921920000 |
| H  | 263.0862730000 | 189.6687420000 | 399.6407410000 |
| H  | 262.5059030000 | 188.3970010000 | 398.6438880000 |
| H  | 265.3502320000 | 186.4639810000 | 400.0604840000 |
| H  | 266.3824140000 | 185.7920590000 | 398.8473550000 |
| H  | 265.1501260000 | 184.7833370000 | 399.6271200000 |
| C  | 264.6900000000 | 186.5740000000 | 390.9080000000 |
| C  | 266.0210000000 | 186.4580000000 | 391.6570000000 |
| O  | 266.9664090000 | 185.8613630000 | 391.1221500000 |
| N  | 266.1040000000 | 187.0410000000 | 392.8470000000 |
| C  | 267.3460000000 | 187.0190000000 | 393.6280000000 |
| H  | 264.0513870000 | 187.3733240000 | 391.2937570000 |
| H  | 264.1470450000 | 185.6268150000 | 390.9897140000 |
| H  | 268.1854470000 | 186.8786640000 | 392.9466540000 |
| H  | 265.2721690000 | 187.4188260000 | 393.2858590000 |
| H  | 267.4423330000 | 187.9543030000 | 394.1844880000 |
| H  | 264.9291130000 | 186.7390320000 | 389.8781990000 |
| H  | 267.2858400000 | 186.1921450000 | 394.3044550000 |
| O  | 253.9936460000 | 186.6059390000 | 392.9321250000 |
| O  | 255.1186120000 | 187.5206390000 | 394.9883180000 |
| O  | 254.6572100000 | 184.9321170000 | 394.6923290000 |
| Cl | 254.0127500000 | 186.2827650000 | 394.4184390000 |

**The intermediate resulted from the O-Cl cleavage of chlorate  
optimized using the bigger model**

|    |                |                |                |
|----|----------------|----------------|----------------|
| Mo | 255.3273912696 | 188.1493704448 | 396.9647251504 |
| P  | 253.3459730212 | 192.5020703414 | 404.5027221867 |
| O  | 254.3309246364 | 193.4811700622 | 403.9307945094 |
| O  | 253.7531354235 | 191.2394139468 | 405.1989257614 |
| O  | 252.3427353291 | 191.9552817512 | 403.1914610027 |
| O  | 252.8633523285 | 193.3163736043 | 401.0915573115 |
| P  | 251.7158062154 | 192.9183062002 | 402.0983907706 |
| O  | 250.9878445442 | 194.1139526332 | 402.6243728996 |
| O  | 250.6956665832 | 191.9485996132 | 401.2924489951 |
| O  | 252.1939309702 | 193.2319919999 | 405.3860092501 |
| C  | 253.7199449280 | 192.2920518181 | 400.4844467433 |
| C  | 253.4165384882 | 192.2868164737 | 398.9924297390 |
| O  | 253.6832832908 | 193.6329404241 | 398.5703600651 |
| C  | 254.1490492769 | 191.2141468038 | 398.2226787329 |

|   |                |                |                |
|---|----------------|----------------|----------------|
| S | 253.8229837330 | 189.5406004942 | 398.6191192476 |
| C | 254.9259034593 | 191.5454285890 | 397.1691755096 |
| S | 255.5929743775 | 190.3843300724 | 396.0854630125 |
| C | 255.2608016870 | 192.9639307371 | 396.8167598558 |
| N | 256.4868302781 | 193.3516333826 | 397.5249234236 |
| C | 256.7043037516 | 194.7387758359 | 397.6551495297 |
| C | 257.9850350733 | 195.1692087716 | 398.0770951536 |
| O | 258.9663374778 | 194.4263748313 | 398.2986198302 |
| N | 258.0956965722 | 196.5508122675 | 398.2295833579 |
| C | 257.0801098231 | 197.4118552885 | 397.9488483245 |
| N | 257.3758121863 | 198.7513507950 | 398.0403776062 |
| N | 255.8628697594 | 197.0151697940 | 397.6398882580 |
| C | 255.6878065190 | 195.6679151625 | 397.4889745726 |
| N | 254.4347476537 | 195.2503141150 | 397.0895720564 |
| C | 254.0947487990 | 193.8646112742 | 397.2101931921 |
| P | 262.3706501875 | 187.9483707978 | 394.5168341054 |
| O | 262.4790047093 | 189.5124975139 | 394.1653087196 |
| O | 261.0498468528 | 187.5771222344 | 393.6353979972 |
| O | 263.5615079093 | 187.1173614115 | 394.2493235647 |
| O | 261.8952934087 | 187.7612356252 | 396.0452099907 |
| C | 260.5852329628 | 188.1564246109 | 396.5150768962 |
| C | 260.0664394370 | 187.1734307936 | 397.5629258845 |
| O | 260.6651945131 | 187.5285241624 | 398.8199490630 |
| C | 258.5590069840 | 187.2583908880 | 397.7393882194 |
| S | 257.5753743308 | 187.5333767757 | 396.3497475418 |
| C | 257.9613396791 | 187.0913684631 | 398.9525087650 |
| S | 256.2524908415 | 187.3908628855 | 399.1257799251 |
| C | 258.7178641723 | 186.6507612051 | 400.1859379883 |
| N | 258.3056675684 | 187.4050140139 | 401.3686881797 |
| C | 259.1677941662 | 187.3021987976 | 402.4800557848 |
| C | 258.7045923295 | 187.3640697412 | 403.8234710683 |
| O | 257.5133171744 | 187.3974861808 | 404.2464725987 |
| N | 259.7186618127 | 187.4064413889 | 404.7898498769 |
| C | 261.0468437819 | 187.3051451695 | 404.5044146280 |
| N | 261.9342649001 | 187.3786870873 | 405.5208986177 |
| N | 261.4828484487 | 187.1765706206 | 403.2619903487 |
| C | 260.5489383442 | 187.1809033944 | 402.2816339757 |
| N | 261.0379678177 | 187.0137684981 | 401.0161381742 |
| C | 260.2617338545 | 186.6477129858 | 399.8640677406 |
| P | 263.9290960476 | 190.4245199602 | 394.0303049797 |
| O | 263.5372091448 | 191.7830295011 | 393.5242586824 |
| O | 264.6299452800 | 190.2101717634 | 395.3481348875 |
| O | 264.6754967713 | 189.6043655754 | 392.8391474695 |
| H | 253.5511195334 | 191.3081329558 | 400.9344746596 |

|   |                |                |                |
|---|----------------|----------------|----------------|
| H | 254.7430225474 | 192.5948020032 | 400.6804719856 |
| H | 257.3081390228 | 192.8756145674 | 397.1479213313 |
| H | 259.0493416695 | 196.9220704679 | 398.2899924501 |
| H | 256.7115429768 | 199.3375688365 | 397.5552508505 |
| H | 258.3546698679 | 198.9814046741 | 397.8944400200 |
| H | 253.6727461864 | 195.9052329339 | 397.2550232668 |
| H | 260.6675437509 | 189.1396862441 | 396.9709960432 |
| H | 259.8891204356 | 188.2006006465 | 395.6794063848 |
| H | 260.3698520382 | 186.1547493717 | 397.2744341505 |
| H | 258.4458276930 | 185.5962881555 | 400.3653848113 |
| H | 258.0092493662 | 188.3744846407 | 401.2088561475 |
| H | 261.5782205086 | 187.1657896110 | 406.4421064887 |
| H | 262.8983019891 | 187.0862694336 | 405.3036818916 |
| H | 262.0430705017 | 187.0459494349 | 400.9018039700 |
| H | 260.5284587586 | 185.6237643812 | 399.5384190277 |
| H | 259.4311094960 | 187.6070690529 | 405.7468606651 |
| H | 260.6157358285 | 188.3643998168 | 393.2769173575 |
| H | 251.1255121967 | 191.3556727585 | 400.6531777360 |
| H | 264.7450044099 | 190.1843317789 | 392.0686354929 |
| H | 251.8409262974 | 194.0004330016 | 404.9093185016 |
| H | 252.3329695014 | 192.0895302930 | 398.8799049862 |
| H | 255.3839504147 | 193.0631210911 | 395.7271173200 |
| H | 253.2657751193 | 193.6346759097 | 396.5339121835 |
| C | 253.8150000000 | 181.3190000000 | 393.8550000000 |
| C | 252.5638720701 | 180.9617139077 | 393.0410709039 |
| C | 251.2928701996 | 181.5507229717 | 393.6249962770 |
| C | 251.2139039128 | 182.9204571643 | 393.9276522603 |
| C | 250.1622661257 | 180.7643909400 | 393.8715898643 |
| C | 250.0392708663 | 183.4815677727 | 394.4229486319 |
| C | 248.9749633065 | 181.3173394144 | 394.3571267093 |
| C | 248.9040242183 | 182.6853606320 | 394.6102830723 |
| O | 247.7096218995 | 183.2116155920 | 395.0533004462 |
| H | 252.4574592622 | 179.8710295738 | 392.9593259747 |
| H | 252.7037932855 | 181.3375440209 | 392.0178596599 |
| H | 250.2021816333 | 179.6960491081 | 393.6622874492 |
| H | 252.0832568659 | 183.5567054107 | 393.7814475016 |
| H | 248.0897802243 | 180.7084112194 | 394.5204563635 |
| H | 249.9895073901 | 184.5455416338 | 394.6361997615 |
| H | 247.5616518350 | 184.0483086597 | 394.5879450036 |
| H | 253.9428532183 | 182.4057378035 | 393.9089519727 |
| H | 254.7073920000 | 180.9467450000 | 393.3967840000 |
| H | 253.7456650000 | 180.9723260000 | 394.8649060000 |
| C | 250.7220000000 | 189.7720000000 | 397.2660000000 |
| C | 251.7060000000 | 190.2220000000 | 396.2070000000 |

|   |                |                |                |
|---|----------------|----------------|----------------|
| O | 251.8665345477 | 191.4546521394 | 396.0177645737 |
| C | 250.5357542974 | 188.2739811753 | 397.6160691758 |
| C | 249.4912939491 | 187.6380739919 | 396.6608154954 |
| C | 250.1658845456 | 188.1411016866 | 399.1020294685 |
| C | 248.9559757605 | 186.2556836504 | 397.0591609120 |
| N | 252.1860000000 | 189.2760000000 | 395.4020000000 |
| C | 253.0110000000 | 189.6170000000 | 394.2560000000 |
| C | 252.3720000000 | 189.5290000000 | 392.8820000000 |
| O | 251.1328415466 | 189.4859549923 | 392.7417293868 |
| N | 253.2200000000 | 189.6570000000 | 391.8670000000 |
| C | 252.7880000000 | 189.7520000000 | 390.4780000000 |
| C | 252.6390000000 | 188.3760000000 | 389.8630000000 |
| O | 253.3168685885 | 188.0387405289 | 388.8869188460 |
| N | 251.7410000000 | 187.5940000000 | 390.4440000000 |
| C | 251.5650000000 | 186.1910000000 | 390.0800000000 |
| C | 251.1417284756 | 185.3539726404 | 391.3097424794 |
| C | 249.8721816842 | 185.7677408362 | 392.0057500129 |
| C | 249.7551226740 | 186.7776561873 | 392.9311386373 |
| C | 248.5705965530 | 185.1537993451 | 391.9224837858 |
| N | 248.4542723464 | 186.8441868708 | 393.4074092139 |
| C | 247.7039260618 | 185.8503912608 | 392.8178260212 |
| C | 248.0664779881 | 184.0466283861 | 391.2238677901 |
| C | 246.3685901781 | 185.4754928607 | 393.0083634894 |
| C | 246.7457334793 | 183.6626216391 | 391.4190460018 |
| C | 245.9042095065 | 184.3704291066 | 392.2992838712 |
| H | 251.4915341969 | 187.7600306554 | 397.4962039860 |
| H | 249.2389701573 | 188.6872766814 | 399.3320879859 |
| H | 250.9768553460 | 188.5256667915 | 399.7297580418 |
| H | 250.0274233227 | 187.0975027394 | 399.3946696999 |
| H | 248.6331956171 | 188.3259145967 | 396.5786842065 |
| H | 249.9327193304 | 187.5862188681 | 395.6575535452 |
| H | 248.3119885570 | 186.3130271119 | 397.9430763455 |
| H | 248.3669466667 | 185.8096604023 | 396.2500947579 |
| H | 249.7583892007 | 185.5514834310 | 397.2909920131 |
| H | 251.0128232732 | 190.3149199371 | 398.1730365931 |
| H | 253.3661278913 | 190.6375243229 | 394.3969156607 |
| H | 253.8878245133 | 188.9684073611 | 394.2603415487 |
| H | 252.1802404036 | 188.3144600541 | 395.7180244608 |
| H | 251.8375510183 | 190.2989284179 | 390.4448489098 |
| H | 254.2333828559 | 189.5159542629 | 391.9922027564 |
| H | 251.9675742139 | 185.4214305377 | 392.0223280934 |
| H | 251.0620227999 | 184.3040019999 | 391.0025867118 |
| H | 250.4909973524 | 187.4862619048 | 393.2793861176 |
| H | 248.1273770071 | 187.5081296092 | 394.0905258942 |

|   |                |                |                |
|---|----------------|----------------|----------------|
| H | 248.7139768335 | 183.4835181671 | 390.5583484069 |
| H | 246.3565164023 | 182.7920310591 | 390.8972438492 |
| H | 245.7242199656 | 186.0171883010 | 393.6969261117 |
| H | 244.8787168393 | 184.0394240880 | 392.4416847215 |
| H | 252.5560636358 | 185.8366550664 | 389.7698354648 |
| H | 251.1953126691 | 187.9741102866 | 391.2093118465 |
| H | 253.5564711559 | 190.2834939920 | 389.9152765898 |
| H | 250.9368910000 | 186.0076260000 | 389.2333870000 |
| H | 249.7488630000 | 190.1330500000 | 397.0061030000 |
| C | 257.4180000000 | 180.5500000000 | 392.8130000000 |
| C | 257.7539374745 | 181.6820163373 | 391.8126552678 |
| C | 256.4905495135 | 182.2292477928 | 391.1826376068 |
| C | 255.7687524732 | 183.2453791011 | 391.8236273593 |
| C | 255.9615699217 | 181.6698417370 | 390.0125688765 |
| C | 254.5496378732 | 183.6912751863 | 391.3143672753 |
| C | 254.7417182181 | 182.1104680572 | 389.4978402537 |
| C | 254.0319180523 | 183.1223326401 | 390.1493949602 |
| H | 258.2670418344 | 182.4862961645 | 392.3533878467 |
| H | 258.4460925231 | 181.3197192022 | 391.0411617056 |
| H | 256.5112108380 | 180.8785574969 | 389.5038272458 |
| H | 256.1428840362 | 183.6915460152 | 392.7412732336 |
| H | 254.3467707463 | 181.6665666150 | 388.5858047688 |
| H | 254.0263264562 | 184.4877718183 | 391.8330664416 |
| H | 253.0830402765 | 183.4703994274 | 389.7478651689 |
| H | 258.2789607383 | 180.3592391997 | 393.4687119089 |
| H | 256.6123450000 | 180.8882630000 | 393.4305750000 |
| H | 257.1886380000 | 179.6229030000 | 392.3305230000 |
| C | 256.5880000000 | 185.6260000000 | 388.1370000000 |
| C | 256.6761829415 | 186.8799446224 | 389.0333854327 |
| C | 256.5677814728 | 186.4999591913 | 390.5156731983 |
| C | 257.9622375066 | 187.6752300616 | 388.7644082291 |
| H | 255.8189119483 | 187.5248538250 | 388.7965418117 |
| H | 257.9757315929 | 188.5992786026 | 389.3558706622 |
| H | 258.8538215675 | 187.0901715446 | 389.0320894272 |
| H | 258.0552333640 | 187.9546977548 | 387.7061506037 |
| H | 256.6581394835 | 187.3778841864 | 391.1580125889 |
| H | 257.3504610777 | 185.7798570794 | 390.7966535151 |
| H | 255.6026860802 | 186.0414295647 | 390.7406024036 |
| H | 255.6156118036 | 185.1441018016 | 388.3148558532 |
| H | 256.5957310000 | 185.9043160000 | 387.1038590000 |
| H | 257.3113660000 | 184.8932020000 | 388.4279430000 |
| C | 257.8290000000 | 191.8650000000 | 391.3050000000 |
| C | 258.1993542650 | 190.5259999275 | 391.9308770576 |
| C | 256.9548578185 | 189.7399649336 | 392.3196082453 |

|   |                |                |                |
|---|----------------|----------------|----------------|
| O | 255.9748523176 | 189.7018126201 | 391.5565673762 |
| N | 257.0430182706 | 189.0621717302 | 393.4739529629 |
| H | 258.8518931990 | 190.6571577066 | 392.7961656732 |
| H | 258.7388227530 | 189.9072971486 | 391.1997191376 |
| H | 257.6618005419 | 189.4166731681 | 394.2077179264 |
| H | 256.2584373164 | 188.4861329904 | 393.7708507857 |
| H | 257.1018913443 | 191.6808625886 | 390.5051658791 |
| H | 258.6802010000 | 192.3357680000 | 390.8592030000 |
| H | 257.3472600000 | 192.5084820000 | 392.0112270000 |
| C | 257.2040000000 | 182.8230000000 | 398.2410000000 |
| C | 256.2080000000 | 182.9730000000 | 399.3890000000 |
| O | 256.2815390090 | 183.9339700334 | 400.1581120872 |
| C | 256.9858270833 | 183.8994151308 | 397.1654345768 |
| C | 258.0917872555 | 183.9798924753 | 396.1278088340 |
| C | 259.3997001290 | 183.5367417429 | 396.3616305793 |
| C | 257.8303396320 | 184.6435966549 | 394.9175191345 |
| C | 260.4305435492 | 183.7882607653 | 395.4537343322 |
| C | 258.8526507076 | 184.9095168491 | 394.0080509811 |
| C | 260.1664688836 | 184.5022474796 | 394.2847895994 |
| O | 261.2125140289 | 184.7539993111 | 393.4409517668 |
| N | 255.2930000000 | 182.0110000000 | 399.5380000000 |
| C | 254.2780000000 | 182.0760000000 | 400.5800000000 |
| C | 253.0560000000 | 182.8560000000 | 400.1430000000 |
| O | 252.1684938211 | 183.0865698710 | 400.9651373238 |
| N | 253.0020000000 | 183.1650000000 | 398.8590000000 |
| C | 251.9230000000 | 184.0210000000 | 398.3810000000 |
| C | 252.4774342191 | 184.9847411576 | 397.3451683735 |
| C | 253.1740945732 | 186.1679554980 | 397.9955486438 |
| O | 253.1552026914 | 186.4218955974 | 399.1800021275 |
| O | 253.7431543707 | 186.9180389358 | 397.0625427751 |
| H | 256.9026017454 | 184.8709754054 | 397.6665735166 |
| H | 256.0241420391 | 183.7424568920 | 396.6576712408 |
| H | 256.8153630216 | 184.9787586292 | 394.7063677914 |
| H | 259.6452874724 | 183.0037487210 | 397.2769352370 |
| H | 258.6375726251 | 185.4530132117 | 393.0904002703 |
| H | 261.4507491518 | 183.4698921904 | 395.6497286334 |
| H | 261.0795636704 | 185.6247317330 | 393.0374730356 |
| H | 258.1865180956 | 182.9523324468 | 398.7060755466 |
| H | 254.6940178904 | 182.5904243111 | 401.4496874891 |
| H | 253.9709827561 | 181.0669383344 | 400.8704935877 |
| H | 255.2932680752 | 181.2266066392 | 398.9021636244 |
| H | 251.6831505211 | 185.3787727220 | 396.7014283726 |
| H | 253.1738024435 | 184.5003606953 | 396.6479001230 |
| H | 251.5550004673 | 184.5771483886 | 399.2479317939 |



|   |                |                |                |
|---|----------------|----------------|----------------|
| H | 253.8037017445 | 183.0197594471 | 398.2660327620 |
| H | 257.1746610000 | 181.8511420000 | 397.7943120000 |
| H | 251.0853860000 | 183.5187120000 | 397.9439530000 |
| C | 252.3740000000 | 194.4250000000 | 391.2270000000 |
| C | 251.4955866777 | 193.8964736925 | 392.3562881291 |
| O | 251.1711154948 | 194.9327200708 | 393.3200768018 |
| C | 252.1557871697 | 192.7024935199 | 393.0295533444 |
| H | 250.5169223157 | 193.6133700998 | 391.9486386893 |
| H | 251.4882003921 | 192.1331159649 | 393.6728322448 |
| H | 253.0036051180 | 193.0373408417 | 393.6434788689 |
| H | 252.5594111824 | 192.0164742864 | 392.2823543546 |
| H | 251.9722604111 | 195.0957532192 | 393.8389892912 |
| H | 252.2641750554 | 193.7387169149 | 390.3745964791 |
| H | 253.4126370000 | 194.3660190000 | 391.4773090000 |
| H | 252.0451240000 | 195.3825470000 | 390.8808150000 |
| C | 252.9230000000 | 197.6780000000 | 399.7280000000 |
| C | 251.9290000000 | 197.6090000000 | 398.5540000000 |
| O | 251.9968458324 | 196.6791431393 | 397.7241513971 |
| C | 252.7876494171 | 196.4157657501 | 400.5909944168 |
| O | 251.4249329841 | 196.4171768621 | 401.0240271612 |
| C | 253.7662297409 | 196.4313478328 | 401.7659443066 |
| N | 251.0510000000 | 198.6040000000 | 398.4340000000 |
| C | 250.2740000000 | 198.7450000000 | 397.2000000000 |
| C | 248.8862484297 | 198.0660931648 | 397.2970115063 |
| C | 248.3569377620 | 197.4146849951 | 396.0020325604 |
| C | 249.2794483778 | 196.3566537584 | 395.3427056904 |
| N | 249.9842010046 | 195.5469038080 | 396.3341720192 |
| C | 250.1911013989 | 194.2279421288 | 396.3240208128 |
| N | 249.7109164689 | 193.4396668190 | 395.3312786653 |
| N | 250.8521358621 | 193.6525539412 | 397.3386698231 |
| H | 252.9951712692 | 195.5397559039 | 399.9639738663 |
| H | 253.6921276776 | 195.5124379362 | 402.3553996974 |
| H | 253.5576374575 | 197.2837284752 | 402.4251343982 |
| H | 254.7998667209 | 196.5123158853 | 401.4079007821 |
| H | 251.2713324517 | 195.6114218310 | 401.5475922534 |
| H | 253.9207524391 | 197.7041622267 | 399.2685000859 |
| H | 248.9598233168 | 197.2899694739 | 398.0666903171 |
| H | 248.1405331283 | 198.7813682710 | 397.6637696381 |
| H | 247.3985028771 | 196.9426697596 | 396.2487913781 |
| H | 248.1420056112 | 198.1786230850 | 395.2430945820 |
| H | 250.0185478667 | 196.8292680767 | 394.6848418850 |
| H | 248.6773462852 | 195.7082026166 | 394.7028556248 |
| H | 250.6369837862 | 196.0598572738 | 396.9435481875 |
| H | 250.0790527337 | 192.4906404538 | 395.3712661652 |

|   |                |                |                |
|---|----------------|----------------|----------------|
| H | 249.8315489706 | 193.8685472546 | 394.4151482731 |
| H | 251.3110595455 | 194.2313951091 | 398.0338636322 |
| H | 251.2765708468 | 192.7371819161 | 397.1131780993 |
| H | 250.8717360359 | 198.2642303224 | 396.4197089066 |
| H | 251.0031464743 | 199.3050789640 | 399.1575345262 |
| H | 252.8225450000 | 198.5275040000 | 400.3707690000 |
| H | 250.2454670000 | 199.7826420000 | 396.9404150000 |
| C | 262.4400000000 | 198.8490000000 | 397.8030000000 |
| C | 261.3740000000 | 197.9840000000 | 397.1570000000 |
| O | 260.2183477020 | 197.9918090944 | 397.6199981183 |
| N | 261.7390000000 | 197.3100000000 | 396.0760000000 |
| C | 260.9410000000 | 196.2040000000 | 395.5760000000 |
| C | 261.7590000000 | 194.9410000000 | 395.8170000000 |
| O | 262.7421308455 | 194.7393334116 | 395.0931707660 |
| C | 260.5568384793 | 196.3410382934 | 394.0896929010 |
| C | 259.7633498551 | 195.1005775060 | 393.6467674626 |
| C | 259.7624823553 | 197.6317366687 | 393.8517653784 |
| N | 261.4030000000 | 194.1810000000 | 396.8510000000 |
| C | 262.2440000000 | 193.0760000000 | 397.2940000000 |
| C | 263.7130000000 | 193.5310000000 | 397.3750000000 |
| O | 263.9541675188 | 194.5960824205 | 397.9602980664 |
| C | 262.0522372641 | 191.8430617485 | 396.4201908800 |
| C | 260.6365011352 | 191.4499082098 | 396.2988339068 |
| N | 259.7905886864 | 191.2507935561 | 397.3697360036 |
| C | 259.9095810598 | 191.1260563959 | 395.1824725231 |
| C | 258.6147737942 | 190.7914384429 | 396.8613882041 |
| N | 258.6503732948 | 190.7060883545 | 395.5371729560 |
| N | 264.6520000000 | 192.7720000000 | 396.8360000000 |
| C | 266.0420000000 | 193.1750000000 | 397.0130000000 |
| C | 266.3610000000 | 194.3290000000 | 396.0730000000 |
| O | 267.3184214333 | 195.0751223593 | 396.3164845539 |
| C | 267.0280870046 | 191.9998028576 | 396.8616699975 |
| O | 267.0833898953 | 191.4425752511 | 395.5673311499 |
| N | 265.6370000000 | 194.4210000000 | 394.9660000000 |
| C | 265.9150000000 | 195.4720000000 | 393.9890000000 |
| C | 265.0093277038 | 195.2501662875 | 392.7569663505 |
| O | 265.1337265590 | 193.9457142609 | 392.2117913710 |
| C | 265.3595349385 | 196.2344021613 | 391.6438523836 |
| H | 262.9988014423 | 199.4235158102 | 397.0551407681 |
| H | 261.4920028632 | 196.3743054490 | 393.5155921619 |
| H | 258.8420403192 | 194.9913714763 | 394.2350602956 |
| H | 259.4768156421 | 195.1800434956 | 392.5923555331 |
| H | 260.3484917672 | 194.1837797511 | 393.7646348338 |
| H | 260.3259319202 | 198.5160881371 | 394.1705160312 |

|   |                |                |                |
|---|----------------|----------------|----------------|
| H | 258.8175564918 | 197.6180452093 | 394.4115862448 |
| H | 259.5202506218 | 197.7490547875 | 392.7895308915 |
| H | 260.0214403049 | 196.1896560574 | 396.1668635321 |
| H | 262.7290776699 | 197.2468475936 | 395.8579891672 |
| H | 262.6413223417 | 191.0090835786 | 396.8227572548 |
| H | 262.4222400885 | 192.0685476904 | 395.4189446509 |
| H | 260.2625708526 | 191.1601761376 | 394.1617895994 |
| H | 257.7874903475 | 190.4943389970 | 397.4797303387 |
| H | 261.9437701367 | 192.8563348070 | 398.3243031283 |
| H | 260.5613824524 | 194.3898462403 | 397.3900280307 |
| H | 266.7776094856 | 191.2462895246 | 397.6239892696 |
| H | 268.0213277126 | 192.4083986943 | 397.0847344900 |
| H | 266.3009435265 | 190.8683790961 | 395.4572738288 |
| H | 266.1550882799 | 193.5817014455 | 398.0228242249 |
| H | 264.4669339458 | 191.8759467863 | 396.3866390492 |
| H | 263.9725323886 | 195.4251644932 | 393.0856348200 |
| H | 265.3102244985 | 197.2720658488 | 391.9959456707 |
| H | 264.6691455338 | 196.1147616110 | 390.8028308091 |
| H | 266.3748036485 | 196.0376237741 | 391.2805581066 |
| H | 264.6106215906 | 193.3127069278 | 392.7366869065 |
| H | 266.9776511314 | 195.4485005025 | 393.7253304606 |
| H | 264.7802540928 | 193.8896741691 | 394.8824236351 |
| H | 260.0146980214 | 191.4023647652 | 398.3726473249 |
| H | 262.0018150000 | 199.5151590000 | 398.5165310000 |
| H | 263.1610058798 | 198.1994882354 | 398.3161107128 |
| H | 265.6768690000 | 196.4273180000 | 394.4079990000 |
| C | 259.4900000000 | 190.5140000000 | 408.0810000000 |
| C | 258.6590000000 | 191.0440000000 | 406.9170000000 |
| O | 258.5401780559 | 190.3896919617 | 405.8720679492 |
| C | 260.4792352074 | 189.4229357382 | 407.6487180908 |
| O | 259.8834589483 | 188.1156178247 | 407.5804127982 |
| N | 258.0660000000 | 192.2110000000 | 407.1150000000 |
| C | 257.1360000000 | 192.7790000000 | 406.1320000000 |
| C | 257.8810000000 | 193.5140000000 | 405.0200000000 |
| O | 259.1084533068 | 193.6914458091 | 405.1057259938 |
| C | 256.2720081701 | 193.7270045202 | 406.9861923437 |
| C | 257.3003180191 | 194.2884517893 | 407.9836751261 |
| C | 258.2017095430 | 193.0767850579 | 408.3007039402 |
| N | 257.1570000000 | 193.9310000000 | 403.9930000000 |
| C | 257.7580000000 | 194.5810000000 | 402.8280000000 |
| C | 257.0801399118 | 194.1022382113 | 401.5410730058 |
| C | 257.1810568570 | 192.6129325788 | 401.3192011059 |
| N | 256.9159056836 | 192.0897513182 | 400.0653209092 |
| C | 257.4459967696 | 191.5085297344 | 402.1082889501 |

|   |                |                |                 |
|---|----------------|----------------|-----------------|
| C | 257.0232961666 | 190.7378333712 | 400.1442174686  |
| N | 257.3468419466 | 190.3482756235 | 401.3639523732  |
| H | 261.3336176362 | 189.3997747144 | 408.3407878272  |
| H | 260.8593762823 | 189.6152196628 | 406.6440473261  |
| H | 259.5704584458 | 187.8676021036 | 408.4589703583  |
| H | 260.0638598677 | 191.3299030804 | 408.5369404063  |
| H | 255.4943269703 | 193.1471670380 | 407.4965385672  |
| H | 255.7785430809 | 194.4885733526 | 406.3778783464  |
| H | 256.8501065547 | 194.7125348100 | 408.8862929367  |
| H | 257.8975214348 | 195.0680550481 | 407.4988851529  |
| H | 257.8633829475 | 192.5463986248 | 409.2015913119  |
| H | 259.2449937840 | 193.3763833170 | 408.4499777268  |
| H | 256.5370167983 | 191.9757392470 | 405.6925012325  |
| H | 256.0234385189 | 194.4112439123 | 401.5502475809  |
| H | 257.5468842469 | 194.6207143777 | 400.69398884345 |
| H | 257.7189815377 | 191.4686675176 | 403.1527433200  |
| H | 256.8211434076 | 190.0786299874 | 399.3145346215  |
| H | 258.8072916706 | 194.2891577598 | 402.8104239629  |
| H | 256.1513736638 | 193.7303327303 | 403.9608307223  |
| H | 256.7040839943 | 192.6137505568 | 399.2002018305  |
| H | 257.7516640000 | 195.6461680000 | 402.9293770000  |
| H | 258.8826200000 | 190.1061770000 | 408.8618140000  |
| C | 262.5170000000 | 191.6280000000 | 404.4240000000  |
| C | 261.4216753688 | 190.7861970446 | 403.7117130637  |
| C | 261.0472887602 | 191.3208687325 | 402.3610330874  |
| N | 260.6749462922 | 192.6410321568 | 402.1717684836  |
| C | 260.9615110733 | 190.7534483052 | 401.1111460294  |
| C | 260.3618835482 | 192.8128835081 | 400.8544213902  |
| N | 260.5347116438 | 191.6885184620 | 400.1828820625  |
| H | 260.5239476907 | 190.7230247820 | 404.3437485437  |
| H | 261.7837349722 | 189.7635280919 | 403.5692038033  |
| H | 261.1377036911 | 189.7234760178 | 400.8315334653  |
| H | 260.0222087275 | 193.7446088537 | 400.4229549465  |
| H | 262.8605024810 | 191.0847126658 | 405.3147678683  |
| H | 260.5332158101 | 193.2986729317 | 402.9289453045  |
| H | 262.1236480000 | 192.5623940000 | 404.7661720000  |
| H | 263.3516530000 | 191.7181200000 | 403.7605750000  |
| C | 247.8970000000 | 194.0110000000 | 404.4930000000  |
| C | 248.2020000000 | 195.4880000000 | 404.7370000000  |
| O | 247.4346072218 | 196.1674482641 | 405.4255271261  |
| C | 246.7961949386 | 193.8157074164 | 403.4456561565  |
| O | 247.2041560101 | 194.2695031088 | 402.1609860487  |
| N | 249.3140000000 | 195.9620000000 | 404.1770000000  |
| C | 249.8020000000 | 197.3150000000 | 404.4650000000  |

|   |                |                |                |
|---|----------------|----------------|----------------|
| H | 245.9161779096 | 194.4084496550 | 403.7180018247 |
| H | 246.4989662274 | 192.7533181898 | 403.4228162349 |
| H | 248.0644765166 | 193.8700334492 | 401.9682921197 |
| H | 248.7981832005 | 193.4934851893 | 404.1254735081 |
| H | 249.0926825849 | 197.7723332411 | 405.1564822324 |
| H | 249.8780275979 | 195.3569955021 | 403.5920143284 |
| H | 250.7887830642 | 197.2675732459 | 404.9422684035 |
| H | 249.8831630000 | 197.9216560000 | 403.5873430000 |
| H | 247.6469520000 | 193.5211100000 | 405.4108150000 |
| C | 248.0800000000 | 189.8890000000 | 402.3840000000 |
| C | 249.0950000000 | 189.0790000000 | 403.1730000000 |
| O | 248.7626657716 | 188.1226794817 | 403.8727968746 |
| N | 250.3660000000 | 189.4520000000 | 403.0170000000 |
| C | 251.5130000000 | 188.7690000000 | 403.5980000000 |
| C | 251.3880000000 | 188.5090000000 | 405.0890000000 |
| O | 251.8678536936 | 187.5066725760 | 405.6385583032 |
| N | 250.8690000000 | 189.5060000000 | 405.7980000000 |
| C | 250.6660000000 | 189.4000000000 | 407.2250000000 |
| H | 248.3903944776 | 190.9346242650 | 402.2612199387 |
| H | 248.0298803263 | 189.4675697746 | 401.3708583827 |
| H | 252.3949030782 | 189.3972985830 | 403.4462339394 |
| H | 251.6957294971 | 187.8172724962 | 403.1035691955 |
| H | 250.5491527435 | 190.3001194545 | 402.5053591933 |
| H | 251.6162549500 | 189.3236181565 | 407.7658662340 |
| H | 250.1690096283 | 190.3103058485 | 407.5731491203 |
| H | 250.5195946721 | 190.3170316328 | 405.3096649881 |
| H | 247.0858870000 | 189.8764540000 | 402.7795790000 |
| H | 250.0641850000 | 188.5601270000 | 407.5030850000 |
| C | 252.9370000000 | 183.9060000000 | 405.2630000000 |
| C | 254.0000167286 | 185.0033377075 | 405.0993385390 |
| C | 253.9520780471 | 185.6907048185 | 403.7728934695 |
| N | 254.9127695341 | 186.5989221864 | 403.3547420876 |
| C | 252.9407486433 | 185.7956186924 | 402.8481340785 |
| C | 254.4345805368 | 187.1989905769 | 402.2228177506 |
| N | 253.2390763706 | 186.7506043057 | 401.9023645785 |
| H | 253.8462146732 | 185.7698247197 | 405.8640967948 |
| H | 255.0017265269 | 184.5761935072 | 405.2736773456 |
| H | 252.0124918073 | 185.2429258288 | 402.8136043500 |
| H | 255.0157027733 | 187.9231502334 | 401.6691181128 |
| H | 253.0310494459 | 183.1996803238 | 404.4250150400 |
| H | 255.8678589103 | 186.7258054385 | 403.6888617089 |
| H | 253.0716360000 | 183.3276930000 | 406.1531320000 |
| H | 251.9378550000 | 184.2828830000 | 405.1954110000 |
| C | 256.1350000000 | 184.2680000000 | 410.0930000000 |

|   |                |                |                |
|---|----------------|----------------|----------------|
| C | 254.8535316440 | 185.0171749916 | 409.6729738052 |
| C | 254.9086171047 | 185.6299856892 | 408.2530161150 |
| C | 255.8080562365 | 186.8740265173 | 408.0924871997 |
| N | 255.8892825492 | 187.4235542862 | 406.7278290517 |
| C | 255.2327199156 | 188.5225455206 | 406.2974472118 |
| N | 254.0885622381 | 188.9139186304 | 406.9291199387 |
| N | 255.7177500126 | 189.2374066114 | 405.2948053630 |
| H | 254.6167768775 | 185.7999047078 | 410.4086181312 |
| H | 254.0060273278 | 184.3202455469 | 409.6920901382 |
| H | 253.8916145815 | 185.9051576203 | 407.9528546278 |
| H | 255.2374280575 | 184.8604027510 | 407.5456275686 |
| H | 255.4505854910 | 187.6732423295 | 408.7521785124 |
| H | 256.8370032049 | 186.6362828520 | 408.3925875375 |
| H | 256.6551738556 | 187.1381105697 | 406.1155736260 |
| H | 253.3794077073 | 188.1788444369 | 406.9602279169 |
| H | 253.7033925563 | 189.7687778047 | 406.5216143026 |
| H | 255.1258995550 | 189.9653166842 | 404.8933304954 |
| H | 256.5959925436 | 188.9611241694 | 404.8529090996 |
| H | 256.9559938340 | 184.9981984198 | 410.1876879433 |
| H | 256.0745740000 | 183.8105880000 | 411.0584130000 |
| H | 256.4546020000 | 183.6142020000 | 409.3085880000 |
| C | 258.2840000000 | 182.3630000000 | 407.6130000000 |
| C | 259.1135178420 | 183.2882150531 | 406.6876692579 |
| C | 259.2960769067 | 182.7137543046 | 405.2687444778 |
| C | 259.8248815997 | 183.8022156974 | 404.3375674334 |
| O | 260.8582050006 | 184.4116395989 | 404.6030868175 |
| N | 259.0719851478 | 184.0628843655 | 403.2326801421 |
| H | 258.5773718780 | 184.2446361812 | 406.5956222199 |
| H | 260.0974184258 | 183.5327222797 | 407.1022260003 |
| H | 260.0185514043 | 181.8881422832 | 405.2822737733 |
| H | 258.3449578548 | 182.3069884460 | 404.9000097422 |
| H | 258.1492415607 | 183.6779083311 | 403.0939423382 |
| H | 259.2917325282 | 184.8984213798 | 402.7038911972 |
| H | 258.8574700375 | 181.4959470044 | 407.9596190101 |
| H | 257.9764080000 | 182.9526100000 | 408.4512410000 |
| H | 257.4941570000 | 182.0178150000 | 406.9790470000 |
| C | 266.7500000000 | 184.8280000000 | 405.9900000000 |
| C | 266.9012487586 | 184.5546850016 | 404.4805814096 |
| C | 266.4187412117 | 185.7246012200 | 403.5927106729 |
| C | 264.9643594780 | 186.1123407901 | 403.8412757513 |
| O | 264.6179126872 | 186.5795626787 | 404.9385147660 |
| N | 264.0949663397 | 185.9099941566 | 402.8322949988 |
| H | 266.3649416814 | 183.6384958860 | 404.1994844164 |
| H | 267.9575883115 | 184.3795049521 | 404.2375087908 |

|    |                |                |                |
|----|----------------|----------------|----------------|
| H  | 267.0162406334 | 186.6160929084 | 403.8197466484 |
| H  | 266.5840269277 | 185.4845763862 | 402.5354745855 |
| H  | 263.1307153002 | 186.2495365633 | 402.9499396668 |
| H  | 264.4143682166 | 185.6038323694 | 401.9258401435 |
| H  | 265.7113804189 | 184.6902254354 | 406.3026730286 |
| H  | 267.3694890000 | 184.1783430000 | 406.5723060000 |
| H  | 266.9695250000 | 185.8595460000 | 406.1706120000 |
| C  | 265.3830000000 | 185.7480000000 | 399.2270000000 |
| C  | 264.4472414064 | 186.2022966803 | 398.0859500132 |
| C  | 264.8740818008 | 187.5770584435 | 397.5213453115 |
| C  | 264.6540075235 | 188.7559401378 | 398.4677165645 |
| O  | 265.5555805053 | 189.5024541236 | 398.8355460239 |
| N  | 263.3646533595 | 188.9124619014 | 398.9140077653 |
| H  | 263.4009057050 | 186.2371054913 | 398.4181360563 |
| H  | 264.4798516280 | 185.4736665485 | 397.2669312078 |
| H  | 265.9413042667 | 187.5732244536 | 397.2778564800 |
| H  | 264.3396345497 | 187.7803860961 | 396.5917493998 |
| H  | 263.1568695546 | 189.7542513463 | 399.4342959873 |
| H  | 262.5848822565 | 188.4053410641 | 398.5166742346 |
| H  | 265.3399136572 | 186.4766642973 | 400.0508946944 |
| H  | 266.3824140000 | 185.7920590000 | 398.8473550000 |
| H  | 265.1501260000 | 184.7833370000 | 399.6271200000 |
| C  | 264.6900000000 | 186.5740000000 | 390.9080000000 |
| C  | 266.0210000000 | 186.4580000000 | 391.6570000000 |
| O  | 266.9668865627 | 185.8593800924 | 391.1235051212 |
| N  | 266.1040000000 | 187.0410000000 | 392.8470000000 |
| C  | 267.3460000000 | 187.0190000000 | 393.6280000000 |
| H  | 264.0513121002 | 187.3745196068 | 391.2918290440 |
| H  | 264.1452455868 | 185.6271966116 | 390.9897487126 |
| H  | 268.1857596101 | 186.8792516883 | 392.9458113708 |
| H  | 265.2697514008 | 187.4184687428 | 393.2815299533 |
| H  | 267.4450413658 | 187.9555138069 | 394.1844271402 |
| H  | 264.9291130000 | 186.7390320000 | 389.8781990000 |
| H  | 267.2858400000 | 186.1921450000 | 394.3044550000 |
| O  | 253.6696241460 | 186.7307422911 | 392.8642092795 |
| O  | 255.2237074713 | 187.7810705226 | 395.2512479967 |
| O  | 254.3865058348 | 184.7101649640 | 394.4915189113 |
| Cl | 253.5519780416 | 186.0567663863 | 394.3007555324 |
